# Supplementary material for: Theoretical studies on CuCl-catalyzed C–H activation/C–O coupling reactions: oxidant and catalyst effects
Source: Royal Society of Chemistry journal article supplement (doi:10.1039/c6ob00581k), 2016-01-01
Supplement: c6ob00581k1.pdf [file c6ob00581k1.pdf]

*Supporting Information*

**Theoretical Studies on the CuCl-Catalyzed C–H Activation/C–O Coupling**

**Reactions: Oxidant and Substituent Effect**

Lu-Lu Zhang, Shi-Jun Li, Lei Zhang, De-Cai Fang\*

College of Chemistry, Beijing Normal University, Beijing 100875, China

[dcfang@bnu.edu.cn](mailto:dcfang@bnu.edu.cn)

**Table S1-1.** Some optimized Cartesian Coordinates of stationary points for the entire catalytic cycle, involved in the discussion on TBHP (**OX-a**) as oxidant, computed at IDSCRF (PCM)-B3LYP/DZVP level in formamide with bond lengths in Å.

| Species    | Cartesian coordinates |              |              |              |
|------------|-----------------------|--------------|--------------|--------------|
| <b>1a</b>  | 6                     | 0.246234000  | 0.823069000  | 0.160252000  |
|            | 8                     | 0.457848000  | 1.832221000  | -0.493749000 |
|            | 8                     | 1.160290000  | -0.131593000 | 0.396310000  |
|            | 6                     | 2.477116000  | 0.056246000  | -0.205882000 |
|            | 6                     | 3.333809000  | -1.134052000 | 0.184414000  |
|            | 1                     | 2.891670000  | 0.998960000  | 0.161716000  |
|            | 1                     | 2.350423000  | 0.134332000  | -1.289221000 |
|            | 1                     | 4.330197000  | -1.022525000 | -0.255175000 |
|            | 1                     | 3.443736000  | -1.200978000 | 1.270965000  |
|            | 1                     | 2.899746000  | -2.069079000 | -0.182219000 |
|            | 6                     | -1.984227000 | -0.323651000 | -0.149066000 |
|            | 8                     | -1.581457000 | -0.723685000 | -1.232626000 |
|            | 6                     | -3.389828000 | -0.586769000 | 0.342697000  |
|            | 1                     | -3.377566000 | -0.992794000 | 1.359860000  |
|            | 1                     | -3.944689000 | 0.358378000  | 0.382577000  |
|            | 1                     | -3.901233000 | -1.277209000 | -0.329995000 |
|            | 6                     | -1.088660000 | 0.486941000  | 0.792520000  |
|            | 1                     | -1.603146000 | 1.415553000  | 1.059604000  |
|            | 1                     | -0.949246000 | -0.090889000 | 1.712799000  |
|            | <b>CuCl</b>           | 29           | 0.000000000  | 0.000000000  |
| 17         |                       | 0.000000000  | 0.000000000  | -1.356359000 |
| <b>CAT</b> | 6                     | 1.371842000  | -0.069308000 | -0.365902000 |
|            | 8                     | 0.502100000  | -0.880291000 | -0.072658000 |
|            | 8                     | 2.678681000  | -0.290254000 | -0.246095000 |
|            | 6                     | 3.086990000  | -1.606694000 | 0.259314000  |
|            | 6                     | 4.602541000  | -1.624706000 | 0.303478000  |
|            | 1                     | 2.681314000  | -2.366163000 | -0.413874000 |

|               |    |              |              |              |
|---------------|----|--------------|--------------|--------------|
|               | 1  | 2.640882000  | -1.740482000 | 1.248008000  |
|               | 1  | 4.937663000  | -2.596792000 | 0.678827000  |
|               | 1  | 5.028213000  | -1.475966000 | -0.693122000 |
|               | 1  | 4.986865000  | -0.847923000 | 0.970923000  |
|               | 6  | 0.144775000  | 2.118340000  | -0.026261000 |
|               | 8  | -0.935483000 | 1.654752000  | 0.354621000  |
|               | 6  | 0.562994000  | 3.503909000  | 0.363167000  |
|               | 1  | 0.764713000  | 4.094060000  | -0.539056000 |
|               | 1  | -0.207658000 | 3.987178000  | 0.964584000  |
|               | 1  | 1.505655000  | 3.457142000  | 0.922232000  |
|               | 6  | 1.082795000  | 1.319432000  | -0.921404000 |
|               | 1  | 0.565893000  | 1.181618000  | -1.880905000 |
|               | 1  | 2.011336000  | 1.860363000  | -1.103753000 |
|               | 29 | -1.794503000 | -0.099953000 | 0.107065000  |
|               | 17 | -3.291076000 | -1.669052000 | -0.071768000 |
| <b>TBHP</b>   | 6  | 0.392997000  | 1.270210000  | 0.889315000  |
|               | 6  | 0.390026000  | -0.000003000 | 0.028214000  |
|               | 1  | 0.370302000  | 2.162958000  | 0.255982000  |
|               | 1  | -0.474387000 | 1.294979000  | 1.553665000  |
|               | 1  | 1.297932000  | 1.305997000  | 1.504683000  |
|               | 6  | 0.392936000  | -1.270551000 | 0.888819000  |
|               | 6  | 1.567318000  | 0.000157000  | -0.957100000 |
|               | 1  | 0.369918000  | -2.163041000 | 0.255134000  |
|               | 1  | 1.298010000  | -1.306757000 | 1.503957000  |
|               | 1  | -0.474295000 | -1.295421000 | 1.553365000  |
|               | 1  | 2.509558000  | 0.000157000  | -0.401018000 |
|               | 1  | 1.544098000  | -0.888775000 | -1.595221000 |
|               | 1  | 1.543998000  | 0.889217000  | -1.595038000 |
|               | 8  | -0.749937000 | 0.000202000  | -0.869576000 |
|               | 8  | -1.975619000 | -0.000038000 | -0.049653000 |
|               | 1  | -2.640349000 | 0.000496000  | -0.777161000 |
| <b>COM1-a</b> | 6  | -0.682758000 | -0.952760000 | 1.850620000  |
|               | 8  | -0.142515000 | 0.155209000  | 1.874683000  |
|               | 6  | -2.080177000 | -0.635664000 | -0.234633000 |
|               | 8  | -1.763820000 | 0.495257000  | -0.587112000 |
|               | 6  | -1.166765000 | -1.569179000 | 0.541984000  |
|               | 1  | -1.656095000 | -2.528527000 | 0.711481000  |
|               | 1  | -0.267786000 | -1.724405000 | -0.069896000 |
|               | 29 | 0.118935000  | 1.549456000  | 0.381735000  |
|               | 17 | 0.380048000  | 3.714368000  | -0.057819000 |
|               | 8  | 1.636711000  | 0.455438000  | -0.952465000 |
|               | 1  | 1.392142000  | 0.584901000  | -1.901873000 |
|               | 8  | -3.263016000 | -1.193613000 | -0.490823000 |
|               | 6  | -4.223182000 | -0.392909000 | -1.257910000 |

|              |    |              |              |              |
|--------------|----|--------------|--------------|--------------|
|              | 1  | -3.759428000 | -0.132517000 | -2.212805000 |
|              | 1  | -4.416468000 | 0.527369000  | -0.700853000 |
|              | 6  | -5.474045000 | -1.231864000 | -1.435085000 |
|              | 1  | -5.914147000 | -1.492745000 | -0.468172000 |
|              | 1  | -5.256820000 | -2.153064000 | -1.983580000 |
|              | 1  | -6.212125000 | -0.658523000 | -2.004908000 |
|              | 6  | -0.859836000 | -1.758392000 | 3.105381000  |
|              | 1  | -0.385247000 | -2.739742000 | 2.985562000  |
|              | 1  | -0.433016000 | -1.237377000 | 3.963276000  |
|              | 1  | -1.927716000 | -1.946053000 | 3.271699000  |
|              | 8  | 1.828703000  | -0.997811000 | -0.894072000 |
|              | 6  | 3.241669000  | -1.290484000 | -0.637777000 |
|              | 6  | 3.665030000  | -0.677198000 | 0.700644000  |
|              | 1  | 3.031454000  | -1.045962000 | 1.513431000  |
|              | 1  | 4.702844000  | -0.944096000 | 0.924632000  |
|              | 1  | 3.592097000  | 0.412988000  | 0.669729000  |
|              | 6  | 4.105729000  | -0.786430000 | -1.798073000 |
|              | 1  | 4.079454000  | 0.304826000  | -1.862197000 |
|              | 1  | 5.146750000  | -1.090867000 | -1.650326000 |
|              | 1  | 3.758331000  | -1.203429000 | -2.749090000 |
|              | 6  | 3.230480000  | -2.823259000 | -0.576456000 |
|              | 1  | 2.888901000  | -3.252055000 | -1.523567000 |
|              | 1  | 4.243743000  | -3.186256000 | -0.380218000 |
|              | 1  | 2.577841000  | -3.179947000 | 0.226427000  |
| <b>TS1-a</b> | 6  | -0.482825000 | -0.743827000 | 1.979215000  |
|              | 8  | -0.123346000 | 0.437023000  | 1.992819000  |
|              | 6  | -2.018551000 | -0.632283000 | -0.025749000 |
|              | 8  | -1.979573000 | 0.580027000  | -0.222412000 |
|              | 6  | -0.935203000 | -1.418033000 | 0.693456000  |
|              | 1  | -1.266634000 | -2.441438000 | 0.872080000  |
|              | 1  | -0.056315000 | -1.436615000 | 0.026621000  |
|              | 29 | -0.020430000 | 1.679873000  | 0.288410000  |
|              | 17 | 0.186774000  | 3.747366000  | -0.433139000 |
|              | 8  | 1.233986000  | 0.590345000  | -0.675150000 |
|              | 1  | 1.337209000  | 0.921338000  | -1.594787000 |
|              | 8  | -3.012377000 | -1.414632000 | -0.433425000 |
|              | 6  | -4.100719000 | -0.776717000 | -1.184985000 |
|              | 1  | -3.664638000 | -0.286976000 | -2.059251000 |
|              | 1  | -4.549877000 | -0.014376000 | -0.543589000 |
|              | 6  | -5.086425000 | -1.864544000 | -1.564578000 |
|              | 1  | -5.499239000 | -2.350626000 | -0.675846000 |
|              | 1  | -4.613136000 | -2.623466000 | -2.194317000 |
|              | 1  | -5.912491000 | -1.417744000 | -2.126832000 |
|              | 6  | -0.463167000 | -1.570554000 | 3.231393000  |

|               |    |              |              |              |
|---------------|----|--------------|--------------|--------------|
|               | 1  | 0.136615000  | -2.473913000 | 3.068769000  |
|               | 1  | -0.063150000 | -0.997661000 | 4.068746000  |
|               | 1  | -1.481590000 | -1.909615000 | 3.458104000  |
|               | 8  | 1.854639000  | -1.180164000 | -1.171698000 |
|               | 6  | 3.170636000  | -1.338722000 | -0.673923000 |
|               | 6  | 3.200544000  | -1.251444000 | 0.860220000  |
|               | 1  | 2.545326000  | -2.011012000 | 1.300828000  |
|               | 1  | 4.213853000  | -1.413179000 | 1.243747000  |
|               | 1  | 2.860417000  | -0.263632000 | 1.182544000  |
|               | 6  | 4.136909000  | -0.326486000 | -1.310908000 |
|               | 1  | 3.874009000  | 0.689374000  | -1.002107000 |
|               | 1  | 5.169949000  | -0.523362000 | -1.004300000 |
|               | 1  | 4.083672000  | -0.383039000 | -2.403223000 |
|               | 6  | 3.522883000  | -2.777797000 | -1.137445000 |
|               | 1  | 3.495024000  | -2.853320000 | -2.228348000 |
|               | 1  | 4.533617000  | -3.025407000 | -0.795602000 |
|               | 1  | 2.823569000  | -3.505230000 | -0.715027000 |
| <b>INT1-a</b> | 6  | -1.452325000 | 0.248693000  | -0.297437000 |
|               | 8  | -0.564592000 | -0.607982000 | -0.245724000 |
|               | 8  | -2.734857000 | -0.044095000 | -0.191426000 |
|               | 6  | -3.100377000 | -1.461159000 | -0.023476000 |
|               | 6  | -4.612043000 | -1.527947000 | 0.060386000  |
|               | 1  | -2.614186000 | -1.823440000 | 0.885235000  |
|               | 1  | -2.703520000 | -2.010411000 | -0.880509000 |
|               | 1  | -4.914210000 | -2.572285000 | 0.186838000  |
|               | 1  | -4.985660000 | -0.956346000 | 0.914725000  |
|               | 1  | -5.075591000 | -1.144217000 | -0.852884000 |
|               | 6  | -0.061477000 | 2.314928000  | 0.293580000  |
|               | 8  | 0.981206000  | 1.689356000  | 0.473139000  |
|               | 6  | -0.245579000 | 3.708644000  | 0.823052000  |
|               | 1  | -0.571539000 | 4.376927000  | 0.017528000  |
|               | 1  | -1.045896000 | 3.705985000  | 1.573427000  |
|               | 1  | 0.679892000  | 4.074930000  | 1.268694000  |
|               | 6  | -1.220201000 | 1.730300000  | -0.511609000 |
|               | 1  | -2.145079000 | 2.281559000  | -0.336788000 |
|               | 1  | -0.956552000 | 1.866712000  | -1.571413000 |
|               | 29 | 1.514618000  | -0.349558000 | -0.249506000 |
|               | 17 | 2.090423000  | -2.240380000 | 0.828612000  |
|               | 8  | 3.003566000  | 0.158964000  | -1.217091000 |
|               | 1  | 3.540644000  | 0.773527000  | -0.673756000 |
| <b>'BuO•</b>  | 6  | 1.268352000  | -0.811643000 | -0.312448000 |
|               | 6  | -0.000674000 | -0.029292000 | 0.081095000  |
|               | 1  | 2.165787000  | -0.252874000 | -0.030774000 |
|               | 1  | 1.288036000  | -1.778920000 | 0.200362000  |

|               |    |              |              |              |
|---------------|----|--------------|--------------|--------------|
|               | 1  | 1.292911000  | -0.997203000 | -1.391264000 |
|               | 6  | -1.289089000 | -0.778348000 | -0.312268000 |
|               | 6  | 0.018221000  | 1.388325000  | -0.585480000 |
|               | 1  | -2.171955000 | -0.197223000 | -0.029534000 |
|               | 1  | -1.319576000 | -0.962381000 | -1.391200000 |
|               | 1  | -1.333491000 | -1.745291000 | 0.199692000  |
|               | 1  | 0.015506000  | 1.245142000  | -1.670704000 |
|               | 1  | -0.865663000 | 1.962772000  | -0.297600000 |
|               | 1  | 0.917704000  | 1.938496000  | -0.298615000 |
|               | 8  | 0.003735000  | 0.271653000  | 1.435530000  |
| <b>DMF</b>    | 6  | -0.860602000 | -0.646490000 | -0.000341000 |
|               | 8  | -1.967627000 | -0.091532000 | 0.000615000  |
|               | 7  | 0.340560000  | -0.020553000 | -0.001706000 |
|               | 1  | -0.765612000 | -1.746767000 | -0.000575000 |
|               | 6  | 0.435085000  | 1.435304000  | 0.000142000  |
|               | 1  | 0.971005000  | 1.780742000  | 0.891943000  |
|               | 1  | 0.975311000  | 1.782488000  | -0.888323000 |
|               | 1  | -0.570852000 | 1.854614000  | -0.001839000 |
|               | 6  | 1.591480000  | -0.770795000 | 0.000604000  |
|               | 1  | 2.187146000  | -0.528612000 | -0.887204000 |
|               | 1  | 2.182450000  | -0.531566000 | 0.892399000  |
|               | 1  | 1.381866000  | -1.842889000 | -0.001814000 |
| <b>INT2-a</b> | 6  | -1.749307000 | 0.848127000  | 0.057390000  |
|               | 8  | -1.296882000 | -0.071376000 | -0.625072000 |
|               | 8  | -2.853921000 | 1.507669000  | -0.269596000 |
|               | 6  | -3.532036000 | 1.115701000  | -1.511994000 |
|               | 6  | -4.743305000 | 2.014230000  | -1.667700000 |
|               | 1  | -3.804134000 | 0.060806000  | -1.427494000 |
|               | 1  | -2.820640000 | 1.229858000  | -2.333702000 |
|               | 1  | -5.271457000 | 1.744947000  | -2.587822000 |
|               | 1  | -5.433840000 | 1.894632000  | -0.827847000 |
|               | 1  | -4.448743000 | 3.065462000  | -1.735798000 |
|               | 6  | -0.843542000 | 0.276372000  | 2.372510000  |
|               | 8  | -0.357685000 | -0.799484000 | 2.046140000  |
|               | 6  | -1.155152000 | 0.618135000  | 3.805927000  |
|               | 1  | -0.674971000 | 1.565057000  | 4.079328000  |
|               | 1  | -2.235782000 | 0.768942000  | 3.918270000  |
|               | 1  | -0.820575000 | -0.179148000 | 4.471029000  |
|               | 6  | -1.131306000 | 1.368766000  | 1.336156000  |
|               | 1  | -1.749072000 | 2.164163000  | 1.754362000  |
|               | 1  | -0.154837000 | 1.792093000  | 1.067377000  |
|               | 29 | 0.393738000  | -1.318660000 | -0.238089000 |
|               | 17 | -0.797938000 | -3.198658000 | -0.857472000 |
|               | 8  | 1.998587000  | -2.241367000 | 0.099528000  |

|              |   |              |              |              |
|--------------|---|--------------|--------------|--------------|
|              | 1 | 1.823718000  | -3.191049000 | -0.046477000 |
|              | 8 | 1.449590000  | 0.499045000  | -0.388090000 |
|              | 6 | 2.707220000  | 0.475916000  | -0.362185000 |
|              | 1 | 3.226977000  | -0.472086000 | -0.181327000 |
|              | 7 | 3.477960000  | 1.550126000  | -0.549871000 |
|              | 6 | 2.911216000  | 2.871728000  | -0.818751000 |
|              | 1 | 3.325579000  | 3.267043000  | -1.751898000 |
|              | 1 | 1.829217000  | 2.788501000  | -0.908966000 |
|              | 1 | 3.159036000  | 3.560010000  | -0.003419000 |
|              | 6 | 4.936535000  | 1.454392000  | -0.486160000 |
|              | 1 | 5.376138000  | 1.766982000  | -1.439100000 |
|              | 1 | 5.321873000  | 2.100748000  | 0.309453000  |
|              | 1 | 5.232879000  | 0.424403000  | -0.279717000 |
| <b>TS2-a</b> | 6 | -2.138332000 | 0.803217000  | -1.270645000 |
|              | 6 | -2.070477000 | -0.063457000 | 0.000015000  |
|              | 1 | -1.312545000 | 1.521589000  | -1.294751000 |
|              | 1 | -2.073446000 | 0.172599000  | -2.163414000 |
|              | 1 | -3.077185000 | 1.366534000  | -1.312529000 |
|              | 6 | -3.219539000 | -1.097089000 | -0.000294000 |
|              | 6 | -2.138408000 | 0.802575000  | 1.271106000  |
|              | 1 | -3.165354000 | -1.733387000 | 0.888278000  |
|              | 1 | -4.184073000 | -0.577606000 | -0.000080000 |
|              | 1 | -3.165417000 | -1.732783000 | -0.889302000 |
|              | 1 | -3.077195000 | 1.365984000  | 1.313168000  |
|              | 1 | -2.073704000 | 0.171494000  | 2.163564000  |
|              | 1 | -1.312534000 | 1.520833000  | 1.295686000  |
|              | 8 | -0.889822000 | -0.868273000 | -0.000139000 |
|              | 6 | 1.255636000  | 0.542744000  | -0.000044000 |
|              | 8 | 1.219288000  | 1.768866000  | -0.000068000 |
|              | 7 | 2.332770000  | -0.253547000 | 0.000063000  |
|              | 1 | 0.168026000  | -0.117051000 | -0.000052000 |
|              | 6 | 3.687143000  | 0.312134000  | 0.000060000  |
|              | 1 | 4.229495000  | -0.023102000 | 0.890701000  |
|              | 1 | 4.229097000  | -0.021937000 | -0.891265000 |
|              | 1 | 3.624476000  | 1.399751000  | 0.000785000  |
|              | 6 | 2.226103000  | -1.714204000 | -0.000075000 |
|              | 1 | 2.716898000  | -2.122881000 | -0.890139000 |
|              | 1 | 2.716912000  | -2.123031000 | 0.889914000  |
|              | 1 | 1.178673000  | -2.012443000 | -0.000092000 |
| <b>BuOH</b>  | 6 | 0.597655000  | 1.309498000  | -0.519537000 |
|              | 6 | -0.004497000 | -0.000626000 | 0.014271000  |
|              | 1 | 0.066243000  | 2.171505000  | -0.103173000 |
|              | 1 | 1.655873000  | 1.393706000  | -0.243083000 |
|              | 1 | 0.533185000  | 1.357952000  | -1.612138000 |

|                     |    |              |              |              |
|---------------------|----|--------------|--------------|--------------|
|                     | 6  | 0.757637000  | -1.217436000 | -0.535165000 |
|                     | 6  | -1.494404000 | -0.090346000 | -0.331233000 |
|                     | 1  | 0.338469000  | -2.144190000 | -0.129699000 |
|                     | 1  | 0.700593000  | -1.261099000 | -1.628299000 |
|                     | 1  | 1.817736000  | -1.171447000 | -0.256938000 |
|                     | 1  | -1.641728000 | -0.093264000 | -1.415723000 |
|                     | 1  | -1.928348000 | -1.008025000 | 0.079386000  |
|                     | 1  | -2.035979000 | 0.763415000  | 0.089347000  |
|                     | 8  | 0.046595000  | -0.008481000 | 1.463548000  |
|                     | 1  | 0.982849000  | 0.052757000  | 1.741917000  |
| <b>(CH3)2N(O)C•</b> | 6  | -0.866784000 | -0.657189000 | 0.000035000  |
|                     | 8  | -1.999088000 | -0.204362000 | -0.000022000 |
|                     | 7  | 0.316820000  | -0.046052000 | 0.000005000  |
|                     | 6  | 1.557404000  | -0.821603000 | -0.000013000 |
|                     | 6  | 0.435735000  | 1.420976000  | 0.000002000  |
|                     | 1  | 0.979306000  | 1.752357000  | -0.891459000 |
|                     | 1  | -0.561960000 | 1.860148000  | 0.000500000  |
|                     | 1  | 0.980154000  | 1.752233000  | 0.890984000  |
|                     | 1  | 2.151709000  | -0.587505000 | 0.890304000  |
|                     | 1  | 1.316031000  | -1.885369000 | 0.000122000  |
|                     | 1  | 2.151600000  | -0.587704000 | -0.890456000 |
| <b>TS3-a</b>        | 6  | 0.869889000  | 1.634918000  | -0.272443000 |
|                     | 8  | -0.245525000 | 1.385116000  | -0.734158000 |
|                     | 8  | 1.817877000  | 2.235227000  | -1.004798000 |
|                     | 6  | 1.471895000  | 2.599882000  | -2.380993000 |
|                     | 6  | 2.680546000  | 3.287716000  | -2.986443000 |
|                     | 1  | 0.597820000  | 3.254978000  | -2.348176000 |
|                     | 1  | 1.202549000  | 1.686359000  | -2.917769000 |
|                     | 1  | 2.448804000  | 3.576523000  | -4.016516000 |
|                     | 1  | 2.941566000  | 4.190749000  | -2.426993000 |
|                     | 1  | 3.548297000  | 2.621705000  | -3.005059000 |
|                     | 6  | 0.429746000  | 1.068820000  | 2.205140000  |
|                     | 8  | -0.738479000 | 0.703668000  | 2.037868000  |
|                     | 6  | 0.995181000  | 1.256544000  | 3.594420000  |
|                     | 1  | 1.950117000  | 0.729725000  | 3.699819000  |
|                     | 1  | 1.195868000  | 2.320537000  | 3.768688000  |
|                     | 1  | 0.285982000  | 0.894413000  | 4.340073000  |
|                     | 6  | 1.377014000  | 1.305002000  | 1.083114000  |
|                     | 1  | 2.247717000  | 1.904086000  | 1.354116000  |
|                     | 1  | 1.967338000  | 0.081919000  | 0.957960000  |
|                     | 29 | -2.047246000 | 0.615607000  | 0.090995000  |
|                     | 17 | -3.034345000 | 2.718312000  | -0.005945000 |
|                     | 8  | -3.599772000 | -0.264576000 | 0.698438000  |
|                     | 1  | -4.286903000 | 0.418444000  | 0.819623000  |

|             |    |              |              |              |
|-------------|----|--------------|--------------|--------------|
|             | 6  | 2.498074000  | -1.214762000 | 1.030855000  |
|             | 8  | 1.831306000  | -1.978792000 | 1.706654000  |
|             | 7  | 3.648786000  | -1.403427000 | 0.389256000  |
|             | 6  | 4.321075000  | -2.713730000 | 0.438977000  |
|             | 1  | 4.430152000  | -3.108156000 | -0.576259000 |
|             | 1  | 5.312920000  | -2.599353000 | 0.887913000  |
|             | 1  | 3.726210000  | -3.402641000 | 1.037336000  |
|             | 6  | 4.321392000  | -0.352776000 | -0.379164000 |
|             | 1  | 5.309036000  | -0.154768000 | 0.049749000  |
|             | 1  | 4.444407000  | -0.677960000 | -1.417248000 |
|             | 1  | 3.737644000  | 0.566306000  | -0.366700000 |
|             | 6  | -1.996249000 | -2.239944000 | -0.582185000 |
|             | 8  | -1.282373000 | -1.208225000 | -0.639471000 |
|             | 7  | -1.629163000 | -3.431539000 | -1.065553000 |
|             | 1  | -2.987285000 | -2.189259000 | -0.115683000 |
|             | 6  | -0.338159000 | -3.632826000 | -1.722156000 |
|             | 1  | 0.244466000  | -4.384037000 | -1.178151000 |
|             | 1  | -0.493119000 | -3.982832000 | -2.748386000 |
|             | 1  | 0.206768000  | -2.690206000 | -1.737347000 |
|             | 6  | -2.509258000 | -4.594522000 | -0.959637000 |
|             | 1  | -2.749274000 | -4.978587000 | -1.956846000 |
|             | 1  | -2.019256000 | -5.387839000 | -0.385056000 |
|             | 1  | -3.436324000 | -4.314541000 | -0.455952000 |
| <b>INT3</b> | 6  | 1.370023000  | 0.571039000  | -0.000244000 |
|             | 8  | 0.611423000  | -0.455421000 | -0.001363000 |
|             | 8  | 2.687980000  | 0.375730000  | 0.000080000  |
|             | 6  | 3.193702000  | -0.998341000 | -0.000514000 |
|             | 6  | 4.708144000  | -0.912600000 | 0.000799000  |
|             | 1  | 2.810404000  | -1.505732000 | -0.889430000 |
|             | 1  | 2.808956000  | -1.507029000 | 0.887029000  |
|             | 1  | 5.124921000  | -1.924734000 | 0.000348000  |
|             | 1  | 5.073866000  | -0.389849000 | -0.887846000 |
|             | 1  | 5.072390000  | -0.391252000 | 0.890877000  |
|             | 6  | -0.373346000 | 2.292563000  | 0.000352000  |
|             | 8  | -1.393359000 | 1.486236000  | 0.000604000  |
|             | 6  | -0.776163000 | 3.751766000  | -0.000355000 |
|             | 6  | 0.960873000  | 1.928360000  | 0.000403000  |
|             | 1  | 1.732995000  | 2.687987000  | 0.000669000  |
|             | 29 | -1.293105000 | -0.413234000 | -0.000113000 |
|             | 17 | -1.403058000 | -2.609768000 | 0.000112000  |
|             | 8  | -3.105897000 | -0.343172000 | 0.000550000  |
|             | 1  | -3.490626000 | -1.247565000 | 0.000184000  |
|             | 1  | -1.391439000 | 3.958475000  | 0.880875000  |
|             | 1  | 0.096314000  | 4.407072000  | 0.002156000  |



|             |              |              |              |              |
|-------------|--------------|--------------|--------------|--------------|
|             | 1            | -1.386303000 | 3.958761000  | -0.885126000 |
| <b>TS4</b>  | 6            | 1.988573000  | -0.585628000 | 0.420671000  |
|             | 8            | 1.397592000  | 0.031869000  | -0.494751000 |
|             | 8            | 3.067350000  | -1.342028000 | 0.143923000  |
|             | 6            | 3.509860000  | -1.395743000 | -1.244113000 |
|             | 6            | 4.749846000  | -2.269931000 | -1.290627000 |
|             | 1            | 3.714505000  | -0.376765000 | -1.584441000 |
|             | 1            | 2.698720000  | -1.805451000 | -1.852480000 |
|             | 1            | 5.108747000  | -2.333826000 | -2.322893000 |
|             | 1            | 5.550669000  | -1.851004000 | -0.673905000 |
|             | 1            | 4.531174000  | -3.283082000 | -0.940039000 |
|             | 6            | 0.519695000  | 0.032096000  | 2.331259000  |
|             | 8            | -0.403869000 | 0.673241000  | 1.670442000  |
|             | 6            | 0.256230000  | 0.003098000  | 3.824682000  |
|             | 6            | 1.639147000  | -0.592330000 | 1.814440000  |
|             | 1            | 2.302132000  | -1.122423000 | 2.488090000  |
|             | 29           | -0.225268000 | 1.333977000  | -0.101391000 |
|             | 17           | -0.203022000 | 2.263190000  | -2.103832000 |
|             | 8            | -0.280133000 | 3.022470000  | 0.648655000  |
|             | 1            | -0.232848000 | 3.687473000  | -0.071906000 |
|             | 1            | 0.988217000  | -0.612988000 | 4.350046000  |
|             | 1            | 0.292740000  | 1.024409000  | 4.217870000  |
|             | 1            | -0.748812000 | -0.386792000 | 4.012784000  |
|             | 6            | -2.374826000 | -0.780943000 | -0.032815000 |
|             | 8            | -1.555015000 | -0.235188000 | -0.807692000 |
|             | 7            | -3.257772000 | -1.715018000 | -0.403588000 |
|             | 1            | -2.408164000 | -0.511552000 | 1.031055000  |
|             | 6            | -4.190517000 | -2.303201000 | 0.557615000  |
|             | 1            | -4.030867000 | -1.868661000 | 1.546250000  |
|             | 1            | -5.222874000 | -2.109488000 | 0.247856000  |
| 1           | -4.036848000 | -3.385823000 | 0.617213000  |              |
| 6           | -3.338559000 | -2.189254000 | -1.785190000 |              |
| 1           | -2.588248000 | -1.676637000 | -2.385295000 |              |
| 1           | -3.159029000 | -3.269097000 | -1.818028000 |              |
| 1           | -4.334748000 | -1.984642000 | -2.191721000 |              |
| <b>INT4</b> | 6            | 2.017572000  | -0.558337000 | 0.272085000  |
|             | 8            | 1.035850000  | -0.695286000 | -0.469754000 |
|             | 8            | 3.229419000  | -1.081673000 | -0.033343000 |
|             | 6            | 3.327032000  | -1.821002000 | -1.282064000 |
|             | 6            | 4.759957000  | -2.304226000 | -1.418695000 |
|             | 1            | 3.039771000  | -1.158385000 | -2.103841000 |
|             | 1            | 2.617431000  | -2.653273000 | -1.251988000 |
|             | 1            | 4.866384000  | -2.866545000 | -2.352015000 |
|             | 1            | 5.458767000  | -1.462545000 | -1.443602000 |

|            |    |              |              |              |
|------------|----|--------------|--------------|--------------|
|            | 1  | 5.034833000  | -2.962089000 | -0.588597000 |
|            | 6  | 0.935294000  | 0.745053000  | 2.119848000  |
|            | 8  | -0.252640000 | 0.719870000  | 1.588716000  |
|            | 6  | 1.053579000  | 1.488441000  | 3.430556000  |
|            | 6  | 2.046252000  | 0.139444000  | 1.549204000  |
|            | 1  | 3.003239000  | 0.198793000  | 2.056724000  |
|            | 29 | -0.531663000 | 1.240033000  | -0.260982000 |
|            | 17 | -1.072332000 | 2.104384000  | -2.256173000 |
|            | 8  | 0.904709000  | 2.357897000  | -0.125238000 |
|            | 1  | 0.929829000  | 2.960356000  | -0.901245000 |
|            | 1  | 0.279217000  | 1.141754000  | 4.122148000  |
|            | 1  | 2.034234000  | 1.357494000  | 3.893574000  |
|            | 1  | 0.880990000  | 2.555536000  | 3.252348000  |
|            | 6  | -2.049695000 | -1.088524000 | 0.203797000  |
|            | 8  | -2.118982000 | 0.069021000  | -0.298799000 |
|            | 7  | -3.073829000 | -1.934340000 | 0.228956000  |
|            | 1  | -1.114529000 | -1.444144000 | 0.644919000  |
|            | 6  | -2.939469000 | -3.269383000 | 0.817063000  |
|            | 1  | -1.925314000 | -3.410660000 | 1.194331000  |
|            | 1  | -3.647421000 | -3.384429000 | 1.643811000  |
|            | 1  | -3.148754000 | -4.032021000 | 0.060384000  |
|            | 6  | -4.383277000 | -1.581630000 | -0.326345000 |
|            | 1  | -4.347034000 | -0.569703000 | -0.726007000 |
|            | 1  | -4.644371000 | -2.282996000 | -1.125202000 |
|            | 1  | -5.142918000 | -1.639892000 | 0.459634000  |
| <b>TS5</b> | 6  | -2.517400000 | 0.581724000  | 0.005816000  |
|            | 8  | -1.781840000 | -0.453072000 | -0.070353000 |
|            | 8  | -3.837936000 | 0.403881000  | 0.147397000  |
|            | 6  | -4.346882000 | -0.963720000 | 0.221557000  |
|            | 6  | -5.850255000 | -0.871838000 | 0.404960000  |
|            | 1  | -3.861702000 | -1.469839000 | 1.060395000  |
|            | 1  | -4.078214000 | -1.484454000 | -0.701311000 |
|            | 1  | -6.267713000 | -1.882115000 | 0.463609000  |
|            | 1  | -6.103197000 | -0.341478000 | 1.327807000  |
|            | 1  | -6.319303000 | -0.354896000 | -0.437485000 |
|            | 6  | -0.786314000 | 2.318466000  | -0.250215000 |
|            | 8  | 0.223937000  | 1.525106000  | -0.404522000 |
|            | 6  | -0.422342000 | 3.788454000  | -0.311818000 |
|            | 6  | -2.105839000 | 1.938635000  | -0.047236000 |
|            | 1  | -2.874529000 | 2.695264000  | 0.052894000  |
|            | 29 | 0.146990000  | -0.401362000 | -0.249172000 |
|            | 17 | 0.235829000  | -2.634172000 | -0.593499000 |
|            | 8  | 0.897563000  | -0.344399000 | 1.880727000  |
|            | 1  | 0.893785000  | -1.268399000 | 2.215188000  |

|             |    |              |              |              |
|-------------|----|--------------|--------------|--------------|
|             | 1  | 0.057938000  | 4.003882000  | -1.271528000 |
|             | 1  | -1.298671000 | 4.428030000  | -0.193150000 |
|             | 1  | 0.302316000  | 4.014425000  | 0.477036000  |
|             | 6  | 2.805423000  | -0.180636000 | 0.211568000  |
|             | 8  | 2.096367000  | -0.308111000 | -0.814574000 |
|             | 7  | 4.114960000  | -0.004022000 | 0.220354000  |
|             | 1  | 2.131199000  | -0.232648000 | 1.233993000  |
|             | 6  | 4.845260000  | 0.139448000  | 1.483938000  |
|             | 1  | 4.150757000  | 0.067796000  | 2.321516000  |
|             | 1  | 5.596705000  | -0.651725000 | 1.569476000  |
|             | 1  | 5.347060000  | 1.111738000  | 1.514144000  |
|             | 6  | 4.903797000  | 0.073776000  | -1.018165000 |
|             | 1  | 4.248548000  | -0.069497000 | -1.876300000 |
|             | 1  | 5.387421000  | 1.053433000  | -1.085207000 |
|             | 1  | 5.673648000  | -0.704038000 | -1.009912000 |
| <b>INT5</b> | 6  | -2.020419000 | 0.782445000  | 0.006746000  |
|             | 8  | -1.513763000 | -0.295094000 | 0.360068000  |
|             | 8  | -3.352074000 | 0.944351000  | -0.012370000 |
|             | 6  | -4.171472000 | -0.205043000 | 0.362495000  |
|             | 6  | -5.624673000 | 0.213625000  | 0.238889000  |
|             | 1  | -3.912298000 | -0.493123000 | 1.384871000  |
|             | 1  | -3.924130000 | -1.035859000 | -0.303929000 |
|             | 1  | -6.266662000 | -0.628792000 | 0.515370000  |
|             | 1  | -5.851732000 | 1.051284000  | 0.904984000  |
|             | 1  | -5.864837000 | 0.505981000  | -0.787630000 |
|             | 6  | -0.007281000 | 2.258532000  | -0.355671000 |
|             | 8  | 0.817308000  | 1.344067000  | 0.247917000  |
|             | 6  | 0.577039000  | 3.568902000  | -0.799422000 |
|             | 6  | -1.337326000 | 2.002154000  | -0.416185000 |
|             | 1  | -1.983344000 | 2.791392000  | -0.784774000 |
|             | 29 | -0.027463000 | -1.496271000 | -0.240300000 |
|             | 17 | 1.167355000  | -2.528759000 | -1.771055000 |
|             | 8  | 0.151735000  | -2.356367000 | 1.845867000  |
|             | 1  | -0.686724000 | -2.262313000 | 2.342997000  |
|             | 1  | 1.176953000  | 3.443165000  | -1.703243000 |
|             | 1  | -0.222633000 | 4.285186000  | -0.994857000 |
|             | 1  | 1.233901000  | 3.973181000  | -0.021512000 |
|             | 6  | 2.153644000  | 1.197901000  | -0.147232000 |
|             | 8  | 2.532414000  | 1.462690000  | -1.281447000 |
|             | 7  | 2.891048000  | 0.698539000  | 0.865898000  |
|             | 1  | 0.325724000  | -3.319450000 | 1.816156000  |
|             | 6  | 2.350308000  | 0.402531000  | 2.199416000  |
|             | 1  | 1.596715000  | 1.137447000  | 2.479845000  |
|             | 1  | 1.904848000  | -0.597552000 | 2.235436000  |

|             |    |              |              |              |
|-------------|----|--------------|--------------|--------------|
|             | 1  | 3.172770000  | 0.457298000  | 2.917044000  |
|             | 6  | 4.263141000  | 0.265646000  | 0.599536000  |
|             | 1  | 4.519558000  | 0.484575000  | -0.435378000 |
|             | 1  | 4.956090000  | 0.793305000  | 1.263371000  |
|             | 1  | 4.357136000  | -0.812063000 | 0.774892000  |
| <b>TS6</b>  | 6  | -0.563184000 | 1.750509000  | 0.331236000  |
|             | 8  | -0.362390000 | 0.668632000  | 0.883319000  |
|             | 8  | -1.785705000 | 2.314185000  | 0.245900000  |
|             | 6  | -2.893715000 | 1.579305000  | 0.844492000  |
|             | 6  | -4.154817000 | 2.394506000  | 0.622917000  |
|             | 1  | -2.679716000 | 1.437044000  | 1.907735000  |
|             | 1  | -2.953418000 | 0.596137000  | 0.368542000  |
|             | 1  | -5.007969000 | 1.868379000  | 1.063151000  |
|             | 1  | -4.077072000 | 3.378128000  | 1.095887000  |
|             | 1  | -4.351150000 | 2.533562000  | -0.444446000 |
|             | 6  | 1.762990000  | 2.335952000  | -0.409417000 |
|             | 8  | 2.342742000  | 1.209332000  | 0.149799000  |
|             | 6  | 2.766533000  | 3.242839000  | -1.049875000 |
|             | 6  | 0.446521000  | 2.606958000  | -0.309530000 |
|             | 1  | 0.086283000  | 3.539803000  | -0.731716000 |
|             | 29 | -1.147396000 | -1.774231000 | 0.074192000  |
|             | 17 | -2.255821000 | -1.834009000 | -1.781706000 |
|             | 8  | -0.218448000 | -1.970529000 | 1.808169000  |
|             | 1  | -0.211451000 | -1.099512000 | 2.262056000  |
|             | 1  | 3.239775000  | 2.729162000  | -1.895170000 |
|             | 1  | 2.306295000  | 4.166877000  | -1.404369000 |
|             | 1  | 3.559315000  | 3.487434000  | -0.333999000 |
|             | 6  | 2.170610000  | -0.017422000 | -0.476183000 |
|             | 8  | 1.633442000  | -0.120580000 | -1.574742000 |
|             | 7  | 2.710524000  | -1.023725000 | 0.247845000  |
|             | 1  | -0.624665000 | -2.608656000 | 2.434613000  |
|             | 6  | 3.256148000  | -0.880412000 | 1.597055000  |
|             | 1  | 3.284639000  | 0.165338000  | 1.891688000  |
|             | 1  | 2.636861000  | -1.437287000 | 2.309877000  |
|             | 1  | 4.273583000  | -1.286405000 | 1.626695000  |
|             | 6  | 2.622313000  | -2.390414000 | -0.263320000 |
|             | 1  | 2.326346000  | -2.371523000 | -1.310762000 |
|             | 1  | 3.599301000  | -2.876959000 | -0.172423000 |
|             | 1  | 1.885280000  | -2.963844000 | 0.311336000  |
| <b>INT6</b> | 6  | -2.501453000 | -0.200117000 | 0.080437000  |
|             | 8  | -1.893085000 | 0.055164000  | -0.963559000 |
|             | 8  | -3.786285000 | 0.154643000  | 0.257941000  |
|             | 6  | -4.434522000 | 0.872719000  | -0.834518000 |
|             | 6  | -5.855078000 | 1.179995000  | -0.397579000 |

|           |    |              |              |              |
|-----------|----|--------------|--------------|--------------|
|           | 1  | -4.406685000 | 0.240945000  | -1.726578000 |
|           | 1  | -3.861140000 | 1.781372000  | -1.037817000 |
|           | 1  | -6.370295000 | 1.719579000  | -1.198662000 |
|           | 1  | -6.411229000 | 0.260977000  | -0.189927000 |
|           | 1  | -5.864719000 | 1.806157000  | 0.499555000  |
|           | 6  | -0.831131000 | -1.572675000 | 1.377638000  |
|           | 8  | -0.074814000 | -1.804706000 | 0.245971000  |
|           | 6  | -0.383518000 | -2.251390000 | 2.638620000  |
|           | 6  | -1.988527000 | -0.884425000 | 1.276033000  |
|           | 1  | -2.630637000 | -0.845437000 | 2.149744000  |
|           | 29 | 1.567041000  | 1.761725000  | -0.328698000 |
|           | 17 | 2.557845000  | 3.182277000  | 0.963666000  |
|           | 8  | 0.663873000  | 0.602895000  | -1.615076000 |
|           | 1  | -0.265769000 | 0.349724000  | -1.360753000 |
|           | 1  | 0.558168000  | -1.824372000 | 2.992886000  |
|           | 1  | -1.138052000 | -2.145024000 | 3.419721000  |
|           | 1  | -0.217230000 | -3.317685000 | 2.447295000  |
|           | 6  | 1.299428000  | -1.597407000 | 0.286079000  |
|           | 8  | 1.812853000  | -0.824636000 | 1.091943000  |
|           | 7  | 1.937017000  | -2.309442000 | -0.666846000 |
|           | 1  | 0.613990000  | 0.984104000  | -2.518251000 |
|           | 6  | 1.246175000  | -3.131524000 | -1.662616000 |
|           | 1  | 1.891461000  | -3.974197000 | -1.925707000 |
|           | 1  | 0.311412000  | -3.517811000 | -1.261579000 |
|           | 1  | 1.036033000  | -2.551260000 | -2.569515000 |
|           | 6  | 3.345399000  | -2.017704000 | -0.935192000 |
|           | 1  | 3.760026000  | -1.433051000 | -0.116257000 |
|           | 1  | 3.900681000  | -2.956082000 | -1.027801000 |
|           | 1  | 3.446335000  | -1.452277000 | -1.869680000 |
| <b>3a</b> | 6  | 1.623880000  | 0.015014000  | -0.097296000 |
|           | 8  | 1.051714000  | -1.062346000 | -0.210207000 |
|           | 8  | 2.970145000  | 0.129385000  | 0.018499000  |
|           | 6  | 3.731368000  | -1.110565000 | 0.005443000  |
|           | 6  | 5.198949000  | -0.750499000 | 0.153593000  |
|           | 1  | 3.532003000  | -1.632108000 | -0.935341000 |
|           | 1  | 3.381164000  | -1.742951000 | 0.826604000  |
|           | 1  | 5.799999000  | -1.665556000 | 0.147434000  |
|           | 1  | 5.533853000  | -0.114518000 | -0.671466000 |
|           | 1  | 5.382609000  | -0.225832000 | 1.096128000  |
|           | 6  | -0.303365000 | 1.625405000  | -0.221193000 |
|           | 8  | -1.203526000 | 0.631246000  | -0.588007000 |
|           | 6  | -0.908073000 | 2.993275000  | -0.151855000 |
|           | 6  | 1.003790000  | 1.355435000  | -0.052142000 |
|           | 1  | 1.674064000  | 2.187736000  | 0.139197000  |

|                           |    |              |              |              |
|---------------------------|----|--------------|--------------|--------------|
|                           | 1  | -1.677659000 | 3.018592000  | 0.627683000  |
|                           | 1  | -0.154793000 | 3.752321000  | 0.067530000  |
|                           | 1  | -1.395003000 | 3.235329000  | -1.103387000 |
|                           | 6  | -1.945208000 | 0.033599000  | 0.412865000  |
|                           | 8  | -1.789512000 | 0.315072000  | 1.598913000  |
|                           | 7  | -2.831948000 | -0.860238000 | -0.085916000 |
|                           | 6  | -2.991085000 | -1.172541000 | -1.505784000 |
|                           | 1  | -2.349504000 | -0.539407000 | -2.112948000 |
|                           | 1  | -2.733736000 | -2.222313000 | -1.690677000 |
|                           | 1  | -4.033987000 | -1.013554000 | -1.803305000 |
|                           | 6  | -3.685558000 | -1.608841000 | 0.833710000  |
|                           | 1  | -3.468291000 | -1.311576000 | 1.857937000  |
|                           | 1  | -4.741060000 | -1.408488000 | 0.615229000  |
|                           | 1  | -3.504773000 | -2.684558000 | 0.723162000  |
| <b>CAT-H<sub>2</sub>O</b> | 6  | 0.249558000  | 2.122985000  | -0.261430000 |
|                           | 8  | -0.815102000 | 1.724619000  | 0.213511000  |
|                           | 6  | 1.478004000  | -0.076207000 | -0.376813000 |
|                           | 8  | 0.656046000  | -0.832434000 | 0.128697000  |
|                           | 6  | 1.109708000  | 1.199126000  | -1.121003000 |
|                           | 1  | 2.006167000  | 1.702160000  | -1.483857000 |
|                           | 1  | 0.495419000  | 0.900341000  | -1.980960000 |
|                           | 29 | -1.609602000 | -0.246183000 | 0.144847000  |
|                           | 17 | -3.022267000 | -1.415490000 | -1.128329000 |
|                           | 8  | 2.794569000  | -0.273127000 | -0.344055000 |
|                           | 6  | 3.269281000  | -1.487880000 | 0.328212000  |
|                           | 1  | 2.803706000  | -2.347773000 | -0.160027000 |
|                           | 1  | 2.933001000  | -1.451100000 | 1.367536000  |
|                           | 6  | 4.781133000  | -1.508352000 | 0.212132000  |
|                           | 1  | 5.225818000  | -0.633173000 | 0.694777000  |
|                           | 1  | 5.095815000  | -1.531443000 | -0.835270000 |
|                           | 1  | 5.166013000  | -2.405933000 | 0.706473000  |
|                           | 6  | 0.739403000  | 3.524905000  | -0.036159000 |
|                           | 1  | 0.875012000  | 4.026966000  | -1.001910000 |
|                           | 1  | 0.035302000  | 4.085605000  | 0.579977000  |
|                           | 1  | 1.724918000  | 3.500198000  | 0.444550000  |
|                           | 8  | -1.824811000 | -0.273952000 | 2.359290000  |
|                           | 1  | -1.874496000 | 0.636284000  | 2.717141000  |
|                           | 1  | -2.677806000 | -0.687815000 | 2.603408000  |
| <b>TS7</b>                | 6  | -0.709002000 | -0.449034000 | 2.168446000  |
|                           | 8  | -0.886969000 | 0.731977000  | 1.856328000  |
|                           | 6  | -1.307523000 | -1.494679000 | -0.062757000 |
|                           | 8  | -1.583858000 | -0.492577000 | -0.714769000 |
|                           | 6  | -0.365879000 | -1.507323000 | 1.129578000  |
|                           | 1  | -0.334209000 | -2.502088000 | 1.574928000  |

|               |    |              |              |              |
|---------------|----|--------------|--------------|--------------|
|               | 1  | 0.635157000  | -1.263746000 | 0.743289000  |
|               | 29 | -0.880091000 | 1.585912000  | 0.020991000  |
|               | 17 | -0.607485000 | 3.233602000  | -1.438516000 |
|               | 8  | 1.808640000  | 0.751513000  | -0.373407000 |
|               | 1  | 1.626039000  | 0.974404000  | -1.317300000 |
|               | 8  | -1.787400000 | -2.707775000 | -0.328272000 |
|               | 6  | -2.678904000 | -2.833236000 | -1.486990000 |
|               | 1  | -2.138375000 | -2.479685000 | -2.368709000 |
|               | 1  | -3.541124000 | -2.182515000 | -1.320863000 |
|               | 6  | -3.072541000 | -4.293368000 | -1.599458000 |
|               | 1  | -3.599630000 | -4.630082000 | -0.702005000 |
|               | 1  | -2.194648000 | -4.927958000 | -1.751816000 |
|               | 1  | -3.740444000 | -4.418901000 | -2.457545000 |
|               | 6  | -0.798299000 | -0.887154000 | 3.601438000  |
|               | 1  | 0.130324000  | -1.391834000 | 3.893709000  |
|               | 1  | -0.985072000 | -0.034824000 | 4.255783000  |
|               | 1  | -1.602164000 | -1.626033000 | 3.707340000  |
|               | 8  | 2.399649000  | -0.580632000 | -0.495494000 |
|               | 6  | 3.838935000  | -0.518837000 | -0.231035000 |
|               | 6  | 4.090032000  | -0.001957000 | 1.189242000  |
|               | 1  | 3.582215000  | -0.633465000 | 1.925630000  |
|               | 1  | 5.162377000  | -0.011930000 | 1.409976000  |
|               | 1  | 3.727681000  | 1.023293000  | 1.299742000  |
|               | 6  | 4.534548000  | 0.348712000  | -1.285620000 |
|               | 1  | 4.218914000  | 1.392817000  | -1.206143000 |
|               | 1  | 5.619665000  | 0.313437000  | -1.145473000 |
|               | 1  | 4.307740000  | -0.011953000 | -2.294430000 |
|               | 6  | 4.240739000  | -1.992862000 | -0.369540000 |
|               | 1  | 4.029038000  | -2.364503000 | -1.376881000 |
|               | 1  | 5.313432000  | -2.098627000 | -0.181964000 |
|               | 1  | 3.702998000  | -2.614445000 | 0.353122000  |
|               | 8  | -3.509840000 | 2.781492000  | 0.270493000  |
|               | 1  | -3.314231000 | 3.207328000  | 1.127214000  |
|               | 1  | -2.910221000 | 3.225070000  | -0.360426000 |
| <b>COM2-a</b> | 6  | -0.733325000 | -0.373143000 | 2.031941000  |
|               | 8  | -0.108497000 | 0.611320000  | 1.632130000  |
|               | 6  | -2.145322000 | -0.772335000 | -0.035991000 |
|               | 8  | -1.755415000 | 0.124893000  | -0.776703000 |
|               | 6  | -1.298117000 | -1.401542000 | 1.056881000  |
|               | 1  | -1.862376000 | -2.175744000 | 1.577223000  |
|               | 1  | -0.429750000 | -1.859200000 | 0.563562000  |
|               | 29 | 0.175826000  | 1.297722000  | -0.309655000 |
|               | 17 | 0.533049000  | 3.216958000  | -1.413587000 |
|               | 8  | 1.529645000  | -0.277955000 | -1.197951000 |

|                           |   |              |              |              |
|---------------------------|---|--------------|--------------|--------------|
|                           | 1 | 1.188402000  | -0.524959000 | -2.093056000 |
|                           | 8 | -3.358183000 | -1.317056000 | -0.103310000 |
|                           | 6 | -4.258445000 | -0.813030000 | -1.146673000 |
|                           | 1 | -3.766228000 | -0.950929000 | -2.112741000 |
|                           | 1 | -4.404360000 | 0.256886000  | -0.977854000 |
|                           | 6 | -5.553830000 | -1.594613000 | -1.043296000 |
|                           | 1 | -6.022436000 | -1.453978000 | -0.064912000 |
|                           | 1 | -5.383342000 | -2.663372000 | -1.202356000 |
|                           | 1 | -6.248387000 | -1.239365000 | -1.811115000 |
|                           | 6 | -0.939229000 | -0.622702000 | 3.498308000  |
|                           | 1 | -0.550031000 | -1.612814000 | 3.764287000  |
|                           | 1 | -0.447052000 | 0.146754000  | 4.094404000  |
|                           | 1 | -2.013699000 | -0.639635000 | 3.718593000  |
|                           | 8 | 1.634890000  | -1.590478000 | -0.551585000 |
|                           | 6 | 3.047486000  | -1.901691000 | -0.315375000 |
|                           | 6 | 3.665101000  | -0.842690000 | 0.603001000  |
|                           | 1 | 3.104802000  | -0.770543000 | 1.540484000  |
|                           | 1 | 4.700528000  | -1.108176000 | 0.839298000  |
|                           | 1 | 3.666185000  | 0.138485000  | 0.121306000  |
|                           | 6 | 3.792756000  | -2.013236000 | -1.649080000 |
|                           | 1 | 3.825673000  | -1.048438000 | -2.162607000 |
|                           | 1 | 4.823557000  | -2.338653000 | -1.476532000 |
|                           | 1 | 3.307448000  | -2.744533000 | -2.303757000 |
|                           | 6 | 2.947052000  | -3.263380000 | 0.383945000  |
|                           | 1 | 2.465792000  | -4.003297000 | -0.262941000 |
|                           | 1 | 3.951924000  | -3.621186000 | 0.627174000  |
|                           | 1 | 2.376880000  | -3.185982000 | 1.314892000  |
|                           | 8 | 0.911127000  | 4.133173000  | 1.748352000  |
|                           | 1 | 0.773251000  | 3.284564000  | 2.207952000  |
|                           | 1 | 0.809121000  | 3.910888000  | 0.800217000  |
| <b>DMF-H<sub>2</sub>O</b> | 8 | 3.700722000  | -0.216506000 | -0.073348000 |
|                           | 1 | 2.757148000  | 0.060188000  | -0.074240000 |
|                           | 1 | 3.920243000  | -0.348050000 | 0.866861000  |
|                           | 6 | 0.107678000  | -0.300023000 | -0.031164000 |
|                           | 8 | 0.985270000  | 0.582319000  | -0.040486000 |
|                           | 7 | -1.220596000 | -0.077278000 | 0.000201000  |
|                           | 1 | 0.370166000  | -1.370647000 | -0.048746000 |
|                           | 6 | -1.762646000 | 1.278754000  | 0.027321000  |
|                           | 1 | -2.402870000 | 1.446065000  | -0.846111000 |
|                           | 1 | -2.360030000 | 1.427680000  | 0.933836000  |
|                           | 1 | -0.938541000 | 1.991188000  | 0.014796000  |
|                           | 6 | -2.179443000 | -1.178543000 | 0.008813000  |
|                           | 1 | -2.797868000 | -1.139059000 | 0.912508000  |
|                           | 1 | -2.835245000 | -1.120432000 | -0.867110000 |



|  |   |              |              |              |
|--|---|--------------|--------------|--------------|
|  | 1 | -1.650299000 | -2.133617000 | -0.012352000 |
|--|---|--------------|--------------|--------------|

**Table S1-2.** Some optimized Cartesian Coordinates of stationary points for the entire catalytic cycle, involved in the discussion on m-CPBA (**OX-b**) as oxidant, computed at IDSCRF (PCM)-B3LYP/DZVP level in formamide with bond lengths in Å.

| Species | Cartesian coordinates |              |              |              |
|---------|-----------------------|--------------|--------------|--------------|
| m-CPBA  | 6                     | -1.988159000 | 0.241958000  | 0.000170000  |
|         | 8                     | -2.868705000 | 1.079518000  | -0.000037000 |
|         | 6                     | -0.520885000 | 0.524725000  | 0.000095000  |
|         | 6                     | -0.120964000 | 1.869907000  | 0.000104000  |
|         | 6                     | 0.440265000  | -0.501081000 | 0.000009000  |
|         | 6                     | 1.237638000  | 2.189913000  | 0.000038000  |
|         | 6                     | 1.790651000  | -0.155833000 | -0.000061000 |
|         | 6                     | 2.205442000  | 1.179423000  | -0.000046000 |
|         | 1                     | -0.875314000 | 2.651054000  | 0.000167000  |
|         | 1                     | 0.144121000  | -1.544916000 | -0.000009000 |
|         | 1                     | 1.552215000  | 3.230671000  | 0.000050000  |
|         | 1                     | 3.264050000  | 1.425465000  | -0.000102000 |
|         | 8                     | -2.214399000 | -1.102909000 | 0.000156000  |
|         | 8                     | -3.638395000 | -1.367069000 | -0.000011000 |
|         | 1                     | -3.599062000 | -2.358304000 | 0.000165000  |
|         | 17                    | 3.001297000  | -1.433786000 | -0.000175000 |
|         | COM1-b1               | 6            | -2.969466000 | -1.263195000 |
| 8       |                       | -2.793568000 | -0.348963000 | -0.736654000 |
| 8       |                       | -3.942212000 | -2.166398000 | -0.043912000 |
| 6       |                       | -4.836444000 | -2.049225000 | -1.201145000 |
| 6       |                       | -5.841096000 | -3.181810000 | -1.113998000 |
| 1       |                       | -4.226158000 | -2.104366000 | -2.106207000 |
| 1       |                       | -5.313696000 | -1.066825000 | -1.160421000 |
| 1       |                       | -6.524711000 | -3.120312000 | -1.966665000 |
| 1       |                       | -5.342090000 | -4.154824000 | -1.143363000 |
| 1       |                       | -6.431298000 | -3.115744000 | -0.195343000 |
| 6       |                       | -2.090805000 | -0.290749000 | 2.231115000  |
| 8       |                       | -1.840228000 | 0.838431000  | 1.814297000  |
| 6       |                       | -2.368626000 | -0.554227000 | 3.684636000  |
| 1       |                       | -1.669929000 | -1.309163000 | 4.064800000  |
| 1       |                       | -2.281829000 | 0.364204000  | 4.266599000  |
| 1       |                       | -3.375372000 | -0.975555000 | 3.794792000  |
| 6       |                       | -2.104032000 | -1.497376000 | 1.288211000  |
| 1       |                       | -1.072945000 | -1.628276000 | 0.936025000  |
| 1       |                       | -2.415180000 | -2.404049000 | 1.807421000  |
| 29      |                       | -1.491075000 | 1.467455000  | -0.248481000 |

|               |    |              |              |              |
|---------------|----|--------------|--------------|--------------|
|               | 17 | -2.003860000 | 3.422359000  | -1.212529000 |
|               | 6  | 2.696928000  | -0.069072000 | -0.573198000 |
|               | 6  | 3.790511000  | -0.239894000 | 0.293109000  |
|               | 6  | 2.672449000  | -0.715765000 | -1.820660000 |
|               | 6  | 4.842641000  | -1.059086000 | -0.111017000 |
|               | 6  | 3.752712000  | -1.506892000 | -2.213569000 |
|               | 6  | 4.845582000  | -1.688147000 | -1.359769000 |
|               | 1  | 3.814853000  | 0.233572000  | 1.268115000  |
|               | 1  | 1.815658000  | -0.588647000 | -2.476281000 |
|               | 1  | 3.745561000  | -1.993712000 | -3.185544000 |
|               | 1  | 5.684372000  | -2.311732000 | -1.658032000 |
|               | 6  | 1.483347000  | 0.695714000  | -0.191316000 |
|               | 8  | 0.350665000  | 0.340866000  | -0.511983000 |
|               | 8  | 1.531411000  | 1.837719000  | 0.546650000  |
|               | 8  | 2.856830000  | 2.429983000  | 0.618568000  |
|               | 1  | 2.904549000  | 2.624386000  | 1.591709000  |
|               | 17 | 6.202918000  | -1.301177000 | 0.978532000  |
| <b>TS1-b1</b> | 6  | -3.189467000 | -1.016426000 | -0.088825000 |
|               | 8  | -2.896745000 | 0.049623000  | -0.626588000 |
|               | 8  | -4.354211000 | -1.630708000 | -0.267049000 |
|               | 6  | -5.320933000 | -0.989088000 | -1.167067000 |
|               | 6  | -6.551098000 | -1.874230000 | -1.214180000 |
|               | 1  | -4.848366000 | -0.881147000 | -2.146561000 |
|               | 1  | -5.539217000 | 0.005934000  | -0.771397000 |
|               | 1  | -7.292531000 | -1.420183000 | -1.879172000 |
|               | 1  | -6.307237000 | -2.868490000 | -1.599532000 |
|               | 1  | -6.999078000 | -1.980250000 | -0.221910000 |
|               | 6  | -1.817963000 | -0.954910000 | 2.049983000  |
|               | 8  | -1.353355000 | 0.171425000  | 1.905632000  |
|               | 6  | -1.939891000 | -1.601699000 | 3.402698000  |
|               | 1  | -1.415675000 | -2.564851000 | 3.402570000  |
|               | 1  | -1.531671000 | -0.951986000 | 4.177930000  |
|               | 1  | -2.994737000 | -1.818614000 | 3.610828000  |
|               | 6  | -2.274164000 | -1.786045000 | 0.844481000  |
|               | 1  | -1.366534000 | -2.032709000 | 0.279153000  |
|               | 1  | -2.751609000 | -2.714322000 | 1.158896000  |
|               | 29 | -1.092747000 | 1.266024000  | -0.146609000 |
|               | 17 | -1.875040000 | 3.359626000  | -0.000368000 |
|               | 6  | 2.604788000  | -0.329305000 | -0.712356000 |
|               | 6  | 3.720777000  | -0.035346000 | 0.089403000  |
|               | 6  | 2.649487000  | -1.390217000 | -1.633996000 |
|               | 6  | 4.866841000  | -0.814846000 | -0.050140000 |
|               | 6  | 3.818561000  | -2.138414000 | -1.772162000 |
|               | 6  | 4.935836000  | -1.859102000 | -0.977416000 |

|                |    |              |              |              |
|----------------|----|--------------|--------------|--------------|
|                | 1  | 3.688713000  | 0.774092000  | 0.808941000  |
|                | 1  | 1.776384000  | -1.615653000 | -2.239664000 |
|                | 1  | 3.864631000  | -2.949121000 | -2.494920000 |
|                | 1  | 5.845269000  | -2.446317000 | -1.075498000 |
|                | 6  | 1.319376000  | 0.385731000  | -0.562954000 |
|                | 8  | 0.225132000  | -0.178596000 | -0.783138000 |
|                | 8  | 1.200144000  | 1.647033000  | -0.154874000 |
|                | 17 | 6.262983000  | -0.471050000 | 0.964684000  |
|                | 8  | 2.660034000  | 2.525254000  | -0.328639000 |
|                | 1  | 2.185418000  | 3.394250000  | -0.358946000 |
| <b>INT1-b1</b> | 6  | -3.155646000 | -0.760760000 | -0.179559000 |
|                | 8  | -2.640714000 | 0.254233000  | -0.664861000 |
|                | 8  | -4.330999000 | -1.213809000 | -0.571979000 |
|                | 6  | -5.027140000 | -0.477390000 | -1.641200000 |
|                | 6  | -6.329990000 | -1.202935000 | -1.910820000 |
|                | 1  | -4.369912000 | -0.458490000 | -2.513764000 |
|                | 1  | -5.182128000 | 0.546137000  | -1.292168000 |
|                | 1  | -6.871249000 | -0.676694000 | -2.703308000 |
|                | 1  | -6.149071000 | -2.229634000 | -2.241498000 |
|                | 1  | -6.962131000 | -1.224026000 | -1.018551000 |
|                | 6  | -2.068379000 | -0.820655000 | 2.123643000  |
|                | 8  | -1.444947000 | 0.228567000  | 1.999435000  |
|                | 6  | -2.386452000 | -1.409222000 | 3.469757000  |
|                | 1  | -2.024091000 | -2.442851000 | 3.520024000  |
|                | 1  | -1.937103000 | -0.812955000 | 4.264817000  |
|                | 1  | -3.474667000 | -1.450778000 | 3.601144000  |
|                | 6  | -2.529614000 | -1.618081000 | 0.897896000  |
|                | 1  | -1.622482000 | -2.065140000 | 0.468986000  |
|                | 1  | -3.211971000 | -2.422050000 | 1.175002000  |
|                | 29 | -0.836761000 | 1.084545000  | -0.086325000 |
|                | 17 | -1.556429000 | 3.209563000  | 0.012597000  |
|                | 6  | 2.683664000  | -0.530337000 | -0.369082000 |
|                | 6  | 3.821423000  | 0.262169000  | -0.147084000 |
|                | 6  | 2.814138000  | -1.892117000 | -0.681597000 |
|                | 6  | 5.079897000  | -0.327732000 | -0.241811000 |
|                | 6  | 4.085940000  | -2.461494000 | -0.771221000 |
|                | 6  | 5.228622000  | -1.683568000 | -0.551911000 |
|                | 1  | 3.713783000  | 1.315406000  | 0.093858000  |
|                | 1  | 1.924860000  | -2.492118000 | -0.851173000 |
|                | 1  | 4.196958000  | -3.515779000 | -1.012654000 |
|                | 1  | 6.219647000  | -2.124625000 | -0.621121000 |
|                | 6  | 1.336812000  | 0.084837000  | -0.271299000 |
|                | 8  | 0.274807000  | -0.602769000 | -0.470903000 |
|                | 8  | 1.192278000  | 1.324435000  | 0.017793000  |

|               |              |              |              |              |
|---------------|--------------|--------------|--------------|--------------|
|               | 17           | 6.514817000  | 0.655158000  | 0.034679000  |
| <b>•OH</b>    | 8            | 0.000000000  | 0.000000000  | 0.110774000  |
|               | 1            | 0.000000000  | 0.000000000  | -0.886189000 |
| <b>TS2-b1</b> | 6            | 2.937242000  | -0.698853000 | -0.201290000 |
|               | 8            | 1.971134000  | -1.265083000 | -0.732870000 |
|               | 8            | 4.112138000  | -0.605301000 | -0.822857000 |
|               | 6            | 4.228438000  | -1.217114000 | -2.153205000 |
|               | 6            | 5.652889000  | -1.002638000 | -2.626052000 |
|               | 1            | 3.495388000  | -0.740461000 | -2.808989000 |
|               | 1            | 3.977945000  | -2.276337000 | -2.058175000 |
|               | 1            | 5.770283000  | -1.453618000 | -3.616424000 |
|               | 1            | 5.888811000  | 0.062615000  | -2.705064000 |
|               | 1            | 6.369132000  | -1.473694000 | -1.946791000 |
|               | 6            | 2.001439000  | -0.396129000 | 2.181793000  |
|               | 8            | 0.902020000  | -0.914869000 | 1.950775000  |
|               | 6            | 2.418598000  | -0.069268000 | 3.594855000  |
|               | 1            | 2.775178000  | 0.964391000  | 3.663953000  |
|               | 1            | 1.582219000  | -0.222477000 | 4.278028000  |
|               | 1            | 3.253918000  | -0.716238000 | 3.888882000  |
|               | 6            | 2.962333000  | -0.014891000 | 1.113127000  |
|               | 1            | 2.588706000  | 1.273076000  | 0.855400000  |
|               | 1            | 3.980405000  | 0.149943000  | 1.468954000  |
|               | 29           | 0.098512000  | -1.703748000 | -0.001275000 |
|               | 17           | 0.440165000  | -3.922169000 | 0.241012000  |
|               | 6            | -3.149959000 | 0.385610000  | -0.460226000 |
|               | 6            | -4.387877000 | -0.206567000 | -0.162987000 |
|               | 6            | -3.085835000 | 1.715164000  | -0.904029000 |
|               | 6            | -5.548502000 | 0.548757000  | -0.316226000 |
|               | 6            | -4.262399000 | 2.452965000  | -1.049967000 |
|               | 6            | -5.503212000 | 1.875339000  | -0.757031000 |
|               | 1            | -4.431224000 | -1.235856000 | 0.179909000  |
|               | 1            | -2.120932000 | 2.159388000  | -1.130073000 |
|               | 1            | -4.222103000 | 3.484031000  | -1.392719000 |
|               | 1            | -6.420485000 | 2.447485000  | -0.869676000 |
|               | 6            | -1.903767000 | -0.407222000 | -0.300623000 |
|               | 8            | -0.758802000 | 0.090927000  | -0.572705000 |
| 8             | -1.940948000 | -1.618114000 | 0.119308000  |              |
| 6             | 2.090325000  | 2.582825000  | 0.781537000  |              |
| 8             | 1.052694000  | 2.737353000  | 1.399962000  |              |
| 7             | 2.821689000  | 3.440222000  | 0.076267000  |              |
| 6             | 4.071201000  | 3.070074000  | -0.593859000 |              |
| 1             | 4.302123000  | 2.019515000  | -0.424015000 |              |
| 1             | 3.978218000  | 3.243152000  | -1.670774000 |              |
| 1             | 4.892196000  | 3.680820000  | -0.205201000 |              |

|                |    |              |              |              |
|----------------|----|--------------|--------------|--------------|
|                | 6  | 2.395004000  | 4.844962000  | -0.057047000 |
|                | 1  | 1.454912000  | 4.989139000  | 0.473860000  |
|                | 1  | 3.161330000  | 5.501640000  | 0.366830000  |
|                | 1  | 2.260074000  | 5.086102000  | -1.116069000 |
|                | 17 | -7.107587000 | -0.183294000 | 0.053443000  |
| <b>INT2-b1</b> | 6  | 3.690318000  | -0.544250000 | -0.129030000 |
|                | 8  | 2.893446000  | 0.454992000  | -0.073447000 |
|                | 8  | 4.994000000  | -0.296863000 | -0.079451000 |
|                | 6  | 5.444832000  | 1.094439000  | 0.042348000  |
|                | 6  | 6.959675000  | 1.065590000  | 0.097651000  |
|                | 1  | 5.005584000  | 1.517140000  | 0.949294000  |
|                | 1  | 5.073020000  | 1.649904000  | -0.822047000 |
|                | 1  | 7.332152000  | 2.090899000  | 0.187720000  |
|                | 1  | 7.312092000  | 0.494654000  | 0.961511000  |
|                | 1  | 7.379362000  | 0.626144000  | -0.811854000 |
|                | 6  | 2.011698000  | -2.313874000 | -0.306822000 |
|                | 8  | 0.967208000  | -1.536774000 | -0.331264000 |
|                | 6  | 1.647253000  | -3.781592000 | -0.371434000 |
|                | 1  | 1.028837000  | -4.038050000 | 0.494400000  |
|                | 1  | 1.054280000  | -3.969990000 | -1.271428000 |
|                | 1  | 2.539681000  | -4.409235000 | -0.381823000 |
|                | 6  | 3.330147000  | -1.911196000 | -0.231725000 |
|                | 1  | 4.127861000  | -2.643899000 | -0.240244000 |
|                | 29 | 1.013136000  | 0.344523000  | -0.195960000 |
|                | 17 | 0.881434000  | 2.545975000  | -0.181726000 |
|                | 6  | -2.901901000 | 0.036456000  | 0.795516000  |
|                | 6  | -3.609802000 | 0.173760000  | -0.409269000 |
|                | 6  | -3.585970000 | -0.212543000 | 1.994702000  |
|                | 6  | -4.999264000 | 0.061289000  | -0.389876000 |
|                | 6  | -4.978028000 | -0.322675000 | 1.988621000  |
|                | 6  | -5.697141000 | -0.186380000 | 0.795673000  |
|                | 1  | -3.083084000 | 0.367194000  | -1.337987000 |
|                | 1  | -3.023712000 | -0.315723000 | 2.917856000  |
|                | 1  | -5.513394000 | -0.514625000 | 2.915438000  |
|                | 1  | -6.780724000 | -0.270590000 | 0.788470000  |
|                | 6  | -1.403088000 | 0.153894000  | 0.835924000  |
|                | 8  | -0.758936000 | 0.120628000  | 1.888341000  |
|                | 8  | -0.851231000 | 0.289070000  | -0.354463000 |
|                | 17 | -5.895621000 | 0.236325000  | -1.896973000 |
| <b>INT3-b1</b> | 6  | 3.251359000  | 1.302159000  | 0.468124000  |
|                | 8  | 2.512230000  | 0.901530000  | -0.490347000 |
|                | 8  | 4.541655000  | 1.514677000  | 0.211439000  |
|                | 6  | 5.033900000  | 1.272913000  | -1.147133000 |
|                | 6  | 6.518525000  | 1.582506000  | -1.143649000 |

|               |    |              |              |              |
|---------------|----|--------------|--------------|--------------|
|               | 1  | 4.479873000  | 1.919136000  | -1.832686000 |
|               | 1  | 4.830816000  | 0.230678000  | -1.405713000 |
|               | 1  | 6.921415000  | 1.412185000  | -2.147084000 |
|               | 1  | 6.703270000  | 2.625836000  | -0.871737000 |
|               | 1  | 7.054733000  | 0.935141000  | -0.443622000 |
|               | 6  | 1.537621000  | 1.434938000  | 2.214229000  |
|               | 8  | 0.536212000  | 1.025587000  | 1.495951000  |
|               | 6  | 1.133870000  | 1.786185000  | 3.632052000  |
|               | 6  | 2.849743000  | 1.567701000  | 1.801981000  |
|               | 1  | 3.605967000  | 1.915713000  | 2.494886000  |
|               | 29 | 0.669497000  | 0.443839000  | -0.305275000 |
|               | 17 | 0.588039000  | -0.039978000 | -2.470096000 |
|               | 8  | -1.187237000 | 0.148064000  | -0.227217000 |
|               | 1  | 0.686133000  | 0.909167000  | 4.109326000  |
|               | 1  | 1.992149000  | 2.122508000  | 4.215876000  |
|               | 1  | 0.375866000  | 2.575138000  | 3.608070000  |
|               | 6  | 1.721874000  | -2.593815000 | -0.207729000 |
|               | 8  | 1.194025000  | -1.698338000 | 0.479000000  |
|               | 7  | 2.051625000  | -3.818084000 | 0.241069000  |
|               | 1  | 1.958063000  | -2.430946000 | -1.269983000 |
|               | 6  | 2.666393000  | -4.811299000 | -0.636162000 |
|               | 1  | 2.794352000  | -4.395344000 | -1.637686000 |
|               | 1  | 3.648032000  | -5.105638000 | -0.248716000 |
|               | 1  | 2.033864000  | -5.703350000 | -0.703339000 |
|               | 6  | 1.807050000  | -4.213184000 | 1.626211000  |
|               | 1  | 1.350731000  | -3.379789000 | 2.158927000  |
|               | 1  | 1.135122000  | -5.078096000 | 1.657445000  |
|               | 1  | 2.751009000  | -4.484214000 | 2.111961000  |
|               | 6  | -1.877516000 | 1.245847000  | -0.449151000 |
|               | 8  | -1.381820000 | 2.340789000  | -0.729903000 |
|               | 6  | -3.367617000 | 1.049427000  | -0.322481000 |
|               | 6  | -3.917673000 | -0.220565000 | -0.086541000 |
|               | 6  | -4.203786000 | 2.168685000  | -0.447821000 |
|               | 6  | -5.302347000 | -0.346714000 | 0.017385000  |
|               | 6  | -5.587932000 | 2.018027000  | -0.338215000 |
|               | 6  | -6.150077000 | 0.757789000  | -0.104691000 |
|               | 1  | -3.273841000 | -1.088426000 | 0.010563000  |
|               | 1  | -3.763440000 | 3.144130000  | -0.630754000 |
|               | 1  | -6.239568000 | 2.883202000  | -0.435264000 |
|               | 1  | -7.226889000 | 0.637206000  | -0.019905000 |
|               | 17 | -5.999526000 | -1.939496000 | 0.309808000  |
| <b>TS3-b1</b> | 6  | 2.313574000  | 1.902556000  | 0.584806000  |
|               | 8  | 2.071543000  | 1.275091000  | -0.463686000 |
|               | 8  | 3.110457000  | 2.984744000  | 0.581540000  |

|                |    |              |              |              |
|----------------|----|--------------|--------------|--------------|
|                | 6  | 3.671747000  | 3.396442000  | -0.701102000 |
|                | 6  | 4.484831000  | 4.654385000  | -0.457713000 |
|                | 1  | 2.848073000  | 3.567498000  | -1.399865000 |
|                | 1  | 4.287348000  | 2.579194000  | -1.087057000 |
|                | 1  | 4.922207000  | 4.989618000  | -1.403590000 |
|                | 1  | 3.856830000  | 5.459688000  | -0.065160000 |
|                | 1  | 5.298467000  | 4.467312000  | 0.249421000  |
|                | 6  | 1.074116000  | 0.459362000  | 2.198542000  |
|                | 8  | 0.813334000  | -0.526984000 | 1.382436000  |
|                | 6  | 0.492167000  | 0.258146000  | 3.582936000  |
|                | 6  | 1.809733000  | 1.591336000  | 1.905062000  |
|                | 1  | 2.008107000  | 2.309343000  | 2.692775000  |
|                | 29 | 0.691516000  | -0.399574000 | -0.501596000 |
|                | 17 | 0.459483000  | -0.451232000 | -2.715439000 |
|                | 8  | -1.205705000 | -0.327585000 | -0.313588000 |
|                | 1  | 0.781082000  | -0.725956000 | 3.963618000  |
|                | 1  | 0.831333000  | 1.030248000  | 4.275990000  |
|                | 1  | -0.600932000 | 0.281684000  | 3.521750000  |
|                | 6  | 2.675634000  | -2.442973000 | 0.263330000  |
|                | 8  | 2.315767000  | -1.704439000 | -0.689775000 |
|                | 7  | 3.680534000  | -3.314048000 | 0.186671000  |
|                | 1  | 2.161328000  | -2.396918000 | 1.231038000  |
|                | 6  | 4.049849000  | -4.151114000 | 1.330111000  |
|                | 1  | 3.398750000  | -3.933043000 | 2.178464000  |
|                | 1  | 3.949391000  | -5.208813000 | 1.066473000  |
|                | 1  | 5.087516000  | -3.953455000 | 1.617321000  |
|                | 6  | 4.461383000  | -3.483167000 | -1.040941000 |
|                | 1  | 4.087694000  | -2.802263000 | -1.803821000 |
|                | 1  | 5.515466000  | -3.266670000 | -0.839556000 |
|                | 1  | 4.372957000  | -4.515318000 | -1.395225000 |
|                | 6  | -1.782363000 | 0.849953000  | -0.349515000 |
|                | 8  | -1.206833000 | 1.930060000  | -0.501813000 |
|                | 6  | -3.283674000 | 0.773266000  | -0.169753000 |
|                | 6  | -4.011508000 | 1.969574000  | -0.088436000 |
|                | 6  | -3.946529000 | -0.461508000 | -0.087782000 |
|                | 6  | -5.398418000 | 1.931451000  | 0.073550000  |
|                | 6  | -5.331686000 | -0.475018000 | 0.071768000  |
|                | 6  | -6.072020000 | 0.707368000  | 0.154943000  |
|                | 1  | -3.485241000 | 2.916934000  | -0.154223000 |
|                | 1  | -3.387203000 | -1.388876000 | -0.150292000 |
|                | 1  | -5.965311000 | 2.857385000  | 0.136586000  |
|                | 1  | -7.151144000 | 0.674049000  | 0.279870000  |
|                | 17 | -6.169128000 | -2.024244000 | 0.171046000  |
| <b>INT4-b1</b> | 6  | 1.503168000  | 1.985524000  | 0.671002000  |

|    |              |              |              |
|----|--------------|--------------|--------------|
| 8  | 1.929709000  | 1.235599000  | -0.220497000 |
| 8  | 1.649270000  | 3.323441000  | 0.615917000  |
| 6  | 2.336859000  | 3.864477000  | -0.549741000 |
| 6  | 2.345128000  | 5.376217000  | -0.414344000 |
| 1  | 1.806929000  | 3.534823000  | -1.447591000 |
| 1  | 3.349268000  | 3.451121000  | -0.577270000 |
| 1  | 2.857553000  | 5.813809000  | -1.277127000 |
| 1  | 1.326481000  | 5.774273000  | -0.381852000 |
| 1  | 2.872275000  | 5.688207000  | 0.492277000  |
| 6  | 0.604099000  | 0.231690000  | 2.206518000  |
| 8  | 1.042211000  | -0.775620000 | 1.500903000  |
| 6  | -0.168489000 | -0.147576000 | 3.449585000  |
| 6  | 0.821160000  | 1.561498000  | 1.883729000  |
| 1  | 0.443895000  | 2.337715000  | 2.540915000  |
| 29 | 0.854083000  | -0.885264000 | -0.411685000 |
| 17 | 0.632255000  | -1.302766000 | -2.603719000 |
| 8  | -0.995601000 | -0.604575000 | -0.225440000 |
| 1  | -0.395267000 | 0.721557000  | 4.070641000  |
| 1  | -1.103865000 | -0.635962000 | 3.156289000  |
| 1  | 0.409990000  | -0.869315000 | 4.034426000  |
| 6  | 3.599873000  | -1.307706000 | 0.119090000  |
| 8  | 2.592432000  | -1.810200000 | -0.458364000 |
| 7  | 4.776138000  | -1.916770000 | 0.183472000  |
| 1  | 3.532880000  | -0.322264000 | 0.587839000  |
| 6  | 5.918762000  | -1.290271000 | 0.855001000  |
| 1  | 5.630423000  | -0.315626000 | 1.251898000  |
| 1  | 6.258343000  | -1.926040000 | 1.678384000  |
| 1  | 6.739558000  | -1.158658000 | 0.143316000  |
| 6  | 4.996639000  | -3.240602000 | -0.407211000 |
| 1  | 4.077604000  | -3.587838000 | -0.875884000 |
| 1  | 5.791051000  | -3.178015000 | -1.157382000 |
| 1  | 5.299888000  | -3.943924000 | 0.374606000  |
| 6  | -1.594855000 | 0.458585000  | -0.716717000 |
| 8  | -1.051865000 | 1.410619000  | -1.277043000 |
| 6  | -3.094393000 | 0.421681000  | -0.505501000 |
| 6  | -3.730971000 | -0.714757000 | 0.017930000  |
| 6  | -3.848614000 | 1.552320000  | -0.852998000 |
| 6  | -5.115795000 | -0.698680000 | 0.180833000  |
| 6  | -5.234387000 | 1.546833000  | -0.678120000 |
| 6  | -5.881707000 | 0.419501000  | -0.159411000 |
| 1  | -3.151526000 | -1.591121000 | 0.287647000  |
| 1  | -3.343056000 | 2.423446000  | -1.258384000 |
| 1  | -5.821222000 | 2.422070000  | -0.947012000 |
| 1  | -6.959992000 | 0.410957000  | -0.023571000 |



|               |              |              |              |              |
|---------------|--------------|--------------|--------------|--------------|
|               | 17           | -5.919942000 | -2.126980000 | 0.833172000  |
| <b>TS4-b1</b> | 6            | 3.325633000  | -1.131239000 | -0.450209000 |
|               | 8            | 3.094603000  | 0.029448000  | 0.021641000  |
|               | 8            | 4.484935000  | -1.714912000 | -0.138159000 |
|               | 6            | 5.420894000  | -0.987512000 | 0.720276000  |
|               | 6            | 6.640716000  | -1.871006000 | 0.899826000  |
|               | 1            | 4.923533000  | -0.775762000 | 1.670245000  |
|               | 1            | 5.667408000  | -0.039292000 | 0.235704000  |
|               | 1            | 7.364466000  | -1.356321000 | 1.539787000  |
|               | 1            | 6.374328000  | -2.819125000 | 1.376108000  |
|               | 1            | 7.120132000  | -2.081609000 | -0.060666000 |
|               | 6            | 1.221052000  | -1.466068000 | -1.678776000 |
|               | 8            | 0.660618000  | -0.339169000 | -1.348039000 |
|               | 6            | 0.361423000  | -2.329082000 | -2.576912000 |
|               | 6            | 2.475684000  | -1.899467000 | -1.288136000 |
|               | 1            | 2.840161000  | -2.865234000 | -1.616595000 |
|               | 29           | 1.509792000  | 1.054036000  | -0.342547000 |
|               | 17           | 2.328530000  | 2.798957000  | 0.802195000  |
|               | 8            | -0.459059000 | 0.479720000  | 1.730991000  |
|               | 1            | 0.130167000  | -1.778040000 | -3.494040000 |
|               | 1            | 0.862182000  | -3.264686000 | -2.831430000 |
|               | 1            | -0.587860000 | -2.549595000 | -2.079620000 |
|               | 6            | -1.041436000 | 2.044823000  | -0.223074000 |
|               | 8            | 0.019704000  | 2.159833000  | -0.892338000 |
|               | 7            | -2.140209000 | 2.714464000  | -0.521293000 |
|               | 1            | -0.921703000 | 1.138981000  | 0.872569000  |
|               | 6            | -3.351072000 | 2.597490000  | 0.297559000  |
|               | 1            | -3.164112000 | 1.945542000  | 1.149670000  |
|               | 1            | -3.641250000 | 3.588099000  | 0.661344000  |
|               | 1            | -4.168470000 | 2.184306000  | -0.301415000 |
|               | 6            | -2.223308000 | 3.621826000  | -1.680457000 |
|               | 1            | -1.276033000 | 3.617921000  | -2.217354000 |
|               | 1            | -3.024893000 | 3.287890000  | -2.346272000 |
|               | 1            | -2.446012000 | 4.635687000  | -1.333990000 |
|               | 6            | -1.195144000 | -0.438494000 | 2.342598000  |
|               | 8            | -0.863249000 | -0.871206000 | 3.447713000  |
|               | 6            | -2.433983000 | -0.945489000 | 1.655808000  |
|               | 6            | -2.514120000 | -1.022077000 | 0.255999000  |
|               | 6            | -3.510535000 | -1.381571000 | 2.443945000  |
|               | 6            | -3.674962000 | -1.530986000 | -0.328860000 |
| 6             | -4.670010000 | -1.867901000 | 1.836875000  |              |
| 6             | -4.761457000 | -1.949624000 | 0.442480000  |              |
| 1             | -1.677188000 | -0.721354000 | -0.366365000 |              |
| 1             | -3.433934000 | -1.328687000 | 3.526233000  |              |

|                |    |              |              |              |
|----------------|----|--------------|--------------|--------------|
|                | 1  | -5.510773000 | -2.190839000 | 2.446225000  |
|                | 1  | -5.658835000 | -2.335344000 | -0.034061000 |
|                | 17 | -3.769147000 | -1.650269000 | -2.084624000 |
| <b>INT5-b1</b> | 6  | -3.155052000 | -0.568051000 | -1.044894000 |
|                | 8  | -1.949641000 | -0.479071000 | -0.794057000 |
|                | 8  | -3.723118000 | -1.697316000 | -1.504402000 |
|                | 6  | -2.848754000 | -2.850437000 | -1.695356000 |
|                | 6  | -3.705641000 | -3.991849000 | -2.211068000 |
|                | 1  | -2.382826000 | -3.089463000 | -0.735186000 |
|                | 1  | -2.063875000 | -2.572960000 | -2.404728000 |
|                | 1  | -3.076629000 | -4.874439000 | -2.365330000 |
|                | 1  | -4.489895000 | -4.250680000 | -1.493425000 |
|                | 1  | -4.174587000 | -3.733623000 | -3.165282000 |
|                | 6  | -3.956154000 | 1.688316000  | -0.307466000 |
|                | 8  | -2.785637000 | 1.927861000  | 0.398548000  |
|                | 6  | -4.982158000 | 2.773563000  | -0.204652000 |
|                | 6  | -4.152778000 | 0.505265000  | -0.921117000 |
|                | 1  | -5.127783000 | 0.307493000  | -1.355478000 |
|                | 29 | -0.806851000 | -1.252360000 | 0.968742000  |
|                | 17 | -2.152980000 | -2.216594000 | 2.408725000  |
|                | 8  | 2.406637000  | -1.285071000 | 1.788787000  |
|                | 1  | -4.593682000 | 3.696221000  | -0.648321000 |
|                | 1  | -5.906176000 | 2.495302000  | -0.714799000 |
|                | 1  | -5.201911000 | 2.978954000  | 0.849260000  |
|                | 6  | -1.861384000 | 2.796168000  | -0.153869000 |
|                | 8  | -1.985604000 | 3.247454000  | -1.289428000 |
|                | 7  | -0.853794000 | 3.057852000  | 0.711887000  |
|                | 1  | 1.574063000  | -1.552332000 | 2.267315000  |
|                | 6  | -0.736566000 | 2.432275000  | 2.030038000  |
|                | 1  | -1.718940000 | 2.190186000  | 2.430879000  |
|                | 1  | -0.135337000 | 1.515023000  | 1.982639000  |
|                | 1  | -0.244827000 | 3.136523000  | 2.707116000  |
|                | 6  | 0.293343000  | 3.839398000  | 0.252435000  |
|                | 1  | 0.084041000  | 4.245693000  | -0.735498000 |
|                | 1  | 0.483484000  | 4.662933000  | 0.948869000  |
|                | 1  | 1.189928000  | 3.209749000  | 0.200350000  |
|                | 6  | 2.096166000  | -0.767890000 | 0.604195000  |
|                | 8  | 0.929595000  | -0.650384000 | 0.194571000  |
|                | 6  | 3.257028000  | -0.332031000 | -0.206153000 |
|                | 6  | 4.566492000  | -0.471409000 | 0.286006000  |
|                | 6  | 3.028385000  | 0.220771000  | -1.477002000 |
|                | 6  | 5.629814000  | -0.050999000 | -0.509789000 |
|                | 6  | 4.110190000  | 0.634346000  | -2.254688000 |
|                | 6  | 5.419102000  | 0.501619000  | -1.777229000 |

|                |    |              |              |              |
|----------------|----|--------------|--------------|--------------|
|                | 1  | 4.746054000  | -0.898718000 | 1.267143000  |
|                | 1  | 2.011319000  | 0.320530000  | -1.843794000 |
|                | 1  | 3.941784000  | 1.062985000  | -3.239451000 |
|                | 1  | 6.263290000  | 0.822958000  | -2.381913000 |
|                | 17 | 7.273432000  | -0.219934000 | 0.093888000  |
| <b>CAT-ROH</b> | 6  | -3.648700000 | 0.614644000  | -0.338900000 |
|                | 8  | -2.543130000 | 0.411230000  | -0.836167000 |
|                | 8  | -4.378152000 | 1.698872000  | -0.575929000 |
|                | 6  | -3.819867000 | 2.692664000  | -1.502248000 |
|                | 6  | -4.832105000 | 3.814718000  | -1.625247000 |
|                | 1  | -3.632816000 | 2.194485000  | -2.456820000 |
|                | 1  | -2.866538000 | 3.035309000  | -1.092267000 |
|                | 1  | -4.442466000 | 4.573464000  | -2.311230000 |
|                | 1  | -5.782145000 | 3.446933000  | -2.023563000 |
|                | 1  | -5.015134000 | 4.288948000  | -0.656686000 |
|                | 6  | -3.462941000 | -0.669883000 | 1.829025000  |
|                | 8  | -2.310183000 | -1.077786000 | 1.683824000  |
|                | 6  | -4.072740000 | -0.491287000 | 3.189514000  |
|                | 1  | -4.989787000 | -1.088208000 | 3.264411000  |
|                | 1  | -3.369422000 | -0.785985000 | 3.969346000  |
|                | 1  | -4.368998000 | 0.556033000  | 3.325455000  |
|                | 6  | -4.335597000 | -0.347672000 | 0.614876000  |
|                | 1  | -4.479830000 | -1.291512000 | 0.071600000  |
|                | 1  | -5.310845000 | 0.039022000  | 0.910910000  |
|                | 29 | -1.259507000 | -1.255391000 | -0.155499000 |
|                | 17 | -0.676563000 | -3.069673000 | -1.406348000 |
|                | 6  | 2.931876000  | 0.330111000  | 0.227715000  |
|                | 6  | 4.207693000  | -0.064200000 | -0.209214000 |
|                | 6  | 2.773282000  | 1.498447000  | 0.989470000  |
|                | 6  | 5.306765000  | 0.723915000  | 0.126811000  |
|                | 6  | 3.888994000  | 2.271644000  | 1.313796000  |
|                | 6  | 5.165596000  | 1.890394000  | 0.884678000  |
|                | 1  | 4.333307000  | -0.966752000 | -0.798115000 |
|                | 1  | 1.780818000  | 1.789911000  | 1.319827000  |
|                | 1  | 3.772806000  | 3.177628000  | 1.903509000  |
|                | 1  | 6.036372000  | 2.490604000  | 1.135544000  |
|                | 6  | 1.728858000  | -0.480404000 | -0.108293000 |
|                | 8  | 0.591554000  | -0.157815000 | 0.258105000  |
|                | 8  | 1.985830000  | -1.569032000 | -0.829532000 |
|                | 1  | 1.135315000  | -2.064507000 | -1.021165000 |
|                | 17 | 6.910153000  | 0.238417000  | -0.416334000 |
| <b>COM1-b2</b> | 6  | -2.095557000 | -2.225142000 | 0.891389000  |
|                | 8  | -1.654831000 | -1.123398000 | 1.224203000  |
|                | 6  | -3.184244000 | -1.189678000 | -1.158010000 |

|               |    |              |              |              |
|---------------|----|--------------|--------------|--------------|
|               | 8  | -2.442989000 | -0.602651000 | -1.931818000 |
|               | 6  | -2.803188000 | -2.467098000 | -0.434233000 |
|               | 1  | -3.679774000 | -3.097730000 | -0.256177000 |
|               | 1  | -2.111130000 | -3.036211000 | -1.066563000 |
|               | 29 | -1.457123000 | 0.803160000  | 0.589524000  |
|               | 17 | -2.350875000 | 2.823396000  | 0.491483000  |
|               | 8  | 0.605994000  | 0.709822000  | 2.338645000  |
|               | 8  | -4.415119000 | -0.786057000 | -0.823766000 |
|               | 6  | -4.882168000 | 0.471081000  | -1.415815000 |
|               | 1  | -4.859422000 | 0.361055000  | -2.503490000 |
|               | 1  | -4.184429000 | 1.258910000  | -1.121316000 |
|               | 6  | -6.285146000 | 0.722974000  | -0.896807000 |
|               | 1  | -6.290486000 | 0.818000000  | 0.193137000  |
|               | 1  | -6.965737000 | -0.084637000 | -1.182870000 |
|               | 1  | -6.663589000 | 1.657480000  | -1.323489000 |
|               | 6  | -1.948547000 | -3.415479000 | 1.799290000  |
|               | 1  | -1.646038000 | -4.303482000 | 1.235104000  |
|               | 1  | -1.230827000 | -3.203878000 | 2.593104000  |
|               | 1  | -2.925376000 | -3.638452000 | 2.247084000  |
|               | 1  | 0.417953000  | -0.164189000 | 2.774414000  |
|               | 8  | 1.839077000  | 0.411960000  | 1.650608000  |
|               | 6  | 1.669706000  | 0.378484000  | 0.296063000  |
|               | 8  | 0.592556000  | 0.504607000  | -0.264878000 |
|               | 6  | 2.965970000  | 0.168223000  | -0.400574000 |
|               | 6  | 4.183676000  | 0.104771000  | 0.299935000  |
|               | 6  | 2.940182000  | 0.033720000  | -1.798189000 |
|               | 6  | 5.359959000  | -0.094505000 | -0.419814000 |
|               | 6  | 4.132299000  | -0.165667000 | -2.495019000 |
|               | 6  | 5.351466000  | -0.231342000 | -1.811589000 |
|               | 1  | 4.214784000  | 0.211708000  | 1.379271000  |
|               | 1  | 1.991833000  | 0.086106000  | -2.324426000 |
|               | 1  | 4.119579000  | -0.270980000 | -3.576957000 |
|               | 1  | 6.281435000  | -0.385650000 | -2.352711000 |
|               | 17 | 6.889924000  | -0.173750000 | 0.444162000  |
| <b>TS1-b2</b> | 6  | 2.663411000  | -0.172070000 | 2.183853000  |
|               | 8  | 2.380966000  | -1.231546000 | 1.633488000  |
|               | 6  | 2.681714000  | 1.225541000  | 0.049755000  |
|               | 8  | 2.319861000  | 0.388091000  | -0.784781000 |
|               | 6  | 2.356104000  | 1.175959000  | 1.525394000  |
|               | 1  | 2.851378000  | 1.997892000  | 2.043271000  |
|               | 1  | 1.269582000  | 1.310491000  | 1.615125000  |
|               | 29 | 1.287661000  | -1.350093000 | -0.407740000 |
|               | 17 | 2.384510000  | -2.785923000 | -1.729572000 |
|               | 8  | -0.061282000 | -2.547724000 | -0.117024000 |

|                |    |              |              |              |
|----------------|----|--------------|--------------|--------------|
|                | 8  | 3.398747000  | 2.285836000  | -0.276449000 |
|                | 6  | 3.750916000  | 2.462870000  | -1.694899000 |
|                | 1  | 2.820690000  | 2.502958000  | -2.266616000 |
|                | 1  | 4.320888000  | 1.584987000  | -2.008023000 |
|                | 6  | 4.553429000  | 3.744095000  | -1.801953000 |
|                | 1  | 5.470059000  | 3.686501000  | -1.208034000 |
|                | 1  | 3.968311000  | 4.605577000  | -1.467684000 |
|                | 1  | 4.831386000  | 3.902412000  | -2.848678000 |
|                | 6  | 3.288700000  | -0.124615000 | 3.550877000  |
|                | 1  | 2.694281000  | 0.516841000  | 4.212098000  |
|                | 1  | 3.368700000  | -1.128073000 | 3.970743000  |
|                | 1  | 4.283530000  | 0.332015000  | 3.480226000  |
|                | 1  | -0.337566000 | -3.163095000 | -0.846177000 |
|                | 8  | -1.792202000 | -1.842815000 | 0.567722000  |
|                | 6  | -1.536126000 | -0.574590000 | 0.489974000  |
|                | 8  | -0.385334000 | -0.066536000 | 0.544535000  |
|                | 6  | -2.740058000 | 0.318558000  | 0.332084000  |
|                | 6  | -3.989729000 | -0.225293000 | -0.006031000 |
|                | 6  | -2.605505000 | 1.700310000  | 0.535461000  |
|                | 6  | -5.082800000 | 0.628469000  | -0.145740000 |
|                | 6  | -3.715858000 | 2.536227000  | 0.396645000  |
|                | 6  | -4.965556000 | 2.007140000  | 0.052609000  |
|                | 1  | -4.096038000 | -1.294336000 | -0.161104000 |
|                | 1  | -1.634105000 | 2.108213000  | 0.798847000  |
|                | 1  | -3.616064000 | 3.607608000  | 0.554323000  |
|                | 1  | -5.831155000 | 2.654932000  | -0.058598000 |
|                | 17 | -6.651800000 | -0.047622000 | -0.584156000 |
| <b>INT1-b2</b> | 6  | 2.578915000  | -0.340101000 | 2.211610000  |
|                | 8  | 2.629013000  | -1.279595000 | 1.428764000  |
|                | 6  | 2.027438000  | 1.392977000  | 0.418470000  |
|                | 8  | 1.870130000  | 0.680332000  | -0.589336000 |
|                | 6  | 1.839650000  | 0.954674000  | 1.848786000  |
|                | 1  | 2.108679000  | 1.773605000  | 2.517012000  |
|                | 1  | 0.771368000  | 0.737216000  | 1.983275000  |
|                | 29 | 1.384836000  | -1.237104000 | -0.662917000 |
|                | 17 | 3.097960000  | -1.688617000 | -1.966584000 |
|                | 8  | 0.824039000  | -2.955374000 | -0.814828000 |
|                | 1  | 1.442580000  | -3.438598000 | -1.407277000 |
|                | 8  | 2.377103000  | 2.654593000  | 0.309552000  |
|                | 6  | 2.558008000  | 3.216581000  | -1.043931000 |
|                | 1  | 1.618677000  | 3.081675000  | -1.584895000 |
|                | 1  | 3.341118000  | 2.637388000  | -1.538094000 |
|                | 6  | 2.929371000  | 4.675355000  | -0.873970000 |
|                | 1  | 3.861262000  | 4.782912000  | -0.311853000 |

|                |    |              |              |              |
|----------------|----|--------------|--------------|--------------|
|                | 1  | 2.137800000  | 5.226926000  | -0.359022000 |
|                | 1  | 3.071179000  | 5.120704000  | -1.863603000 |
|                | 6  | 3.192719000  | -0.393374000 | 3.583999000  |
|                | 1  | 2.449898000  | -0.114495000 | 4.340428000  |
|                | 1  | 3.583458000  | -1.391036000 | 3.788167000  |
|                | 1  | 4.001898000  | 0.344377000  | 3.648837000  |
|                | 8  | -0.217583000 | -0.881248000 | 0.329392000  |
|                | 6  | -1.189958000 | -0.541274000 | -0.484528000 |
|                | 8  | -1.044837000 | -0.379429000 | -1.703671000 |
|                | 6  | -2.523255000 | -0.350240000 | 0.190357000  |
|                | 6  | -3.584927000 | 0.157200000  | -0.574683000 |
|                | 6  | -2.719719000 | -0.671694000 | 1.542019000  |
|                | 6  | -4.828329000 | 0.335631000  | 0.027932000  |
|                | 6  | -3.976580000 | -0.488008000 | 2.124867000  |
|                | 6  | -5.042225000 | 0.018577000  | 1.372893000  |
|                | 1  | -3.426843000 | 0.401246000  | -1.620568000 |
|                | 1  | -1.895311000 | -1.066902000 | 2.127200000  |
|                | 1  | -4.134919000 | -0.739571000 | 3.170884000  |
|                | 1  | -6.020628000 | 0.163076000  | 1.823574000  |
|                | 17 | -6.165020000 | 0.973642000  | -0.929380000 |
| <b>INT2-b2</b> | 6  | 1.583633000  | -2.979888000 | -1.445677000 |
|                | 8  | 1.877238000  | -1.970021000 | -2.067041000 |
|                | 6  | 1.882462000  | -1.882160000 | 0.856303000  |
|                | 8  | 2.028199000  | -0.684321000 | 0.573459000  |
|                | 6  | 1.170098000  | -2.923365000 | 0.031339000  |
|                | 1  | 1.281158000  | -3.897536000 | 0.510272000  |
|                | 1  | 0.102337000  | -2.671466000 | 0.044504000  |
|                | 29 | 1.457772000  | 0.377412000  | -0.990723000 |
|                | 17 | 3.570325000  | 0.916777000  | -1.418935000 |
|                | 8  | 0.992228000  | 1.333030000  | -2.475421000 |
|                | 1  | 1.786125000  | 1.778069000  | -2.846105000 |
|                | 8  | 2.365604000  | -2.375322000 | 1.979819000  |
|                | 6  | 3.049998000  | -1.454670000 | 2.904052000  |
|                | 1  | 2.351968000  | -0.651262000 | 3.149930000  |
|                | 1  | 3.906929000  | -1.030874000 | 2.375474000  |
|                | 6  | 3.458319000  | -2.263412000 | 4.118854000  |
|                | 1  | 4.141265000  | -3.072189000 | 3.843797000  |
|                | 1  | 2.585283000  | -2.691465000 | 4.619647000  |
|                | 1  | 3.972195000  | -1.605170000 | 4.826366000  |
|                | 6  | 1.563953000  | -4.348983000 | -2.076543000 |
|                | 1  | 0.609144000  | -4.847890000 | -1.874279000 |
|                | 1  | 1.729314000  | -4.273583000 | -3.152194000 |
|                | 1  | 2.347582000  | -4.969197000 | -1.624387000 |
|                | 8  | -0.416277000 | -0.138320000 | -0.984271000 |

|               |    |              |              |              |
|---------------|----|--------------|--------------|--------------|
|               | 6  | -1.196460000 | -0.291509000 | 0.052598000  |
|               | 8  | -0.851092000 | -0.452049000 | 1.229860000  |
|               | 6  | -2.668085000 | -0.299510000 | -0.323738000 |
|               | 6  | -3.600370000 | -0.666044000 | 0.659263000  |
|               | 6  | -3.107285000 | 0.053220000  | -1.608620000 |
|               | 6  | -4.956568000 | -0.673201000 | 0.339187000  |
|               | 6  | -4.473099000 | 0.044594000  | -1.906477000 |
|               | 6  | -5.411373000 | -0.320749000 | -0.934956000 |
|               | 1  | -3.255889000 | -0.935033000 | 1.652800000  |
|               | 1  | -2.380692000 | 0.334601000  | -2.363806000 |
|               | 1  | -4.816542000 | 0.322271000  | -2.900343000 |
|               | 1  | -6.473852000 | -0.330806000 | -1.163578000 |
|               | 17 | -6.129951000 | -1.135243000 | 1.574339000  |
|               | 6  | 0.642466000  | 3.279110000  | 0.076365000  |
|               | 8  | 1.138977000  | 2.235761000  | 0.535196000  |
|               | 7  | 0.427284000  | 4.410446000  | 0.778255000  |
|               | 1  | 0.336810000  | 3.341786000  | -0.979013000 |
|               | 6  | 0.774765000  | 4.504607000  | 2.193294000  |
|               | 1  | 1.504928000  | 5.306622000  | 2.350649000  |
|               | 1  | -0.119216000 | 4.723437000  | 2.788317000  |
|               | 1  | 1.202466000  | 3.556492000  | 2.517455000  |
|               | 6  | -0.162064000 | 5.592340000  | 0.156433000  |
|               | 1  | -1.098031000 | 5.862563000  | 0.658443000  |
|               | 1  | 0.526858000  | 6.442277000  | 0.220426000  |
|               | 1  | -0.374264000 | 5.391871000  | -0.895946000 |
| <b>TS2-b2</b> | 6  | 1.412770000  | -2.802256000 | -1.480145000 |
|               | 8  | 1.645002000  | -1.738782000 | -2.080003000 |
|               | 6  | 1.905681000  | -1.941187000 | 0.843346000  |
|               | 8  | 2.106831000  | -0.716240000 | 0.626156000  |
|               | 6  | 1.226650000  | -2.881831000 | -0.027108000 |
|               | 1  | 1.203958000  | -3.891557000 | 0.381147000  |
|               | 1  | -0.058163000 | -2.371399000 | 0.055027000  |
|               | 29 | 1.629522000  | 0.280628000  | -0.957813000 |
|               | 17 | 3.782605000  | 0.703162000  | -1.466063000 |
|               | 8  | 1.175467000  | 1.314397000  | -2.367685000 |
|               | 1  | 1.971843000  | 1.641428000  | -2.842533000 |
|               | 8  | 2.270611000  | -2.449239000 | 2.017786000  |
|               | 6  | 2.843984000  | -1.543023000 | 3.018645000  |
|               | 1  | 2.128272000  | -0.737224000 | 3.199989000  |
|               | 1  | 3.759139000  | -1.113219000 | 2.604404000  |
|               | 6  | 3.110392000  | -2.365971000 | 4.264350000  |
|               | 1  | 3.817708000  | -3.174773000 | 4.059005000  |
|               | 1  | 2.185267000  | -2.797660000 | 4.657289000  |
|               | 1  | 3.542343000  | -1.719052000 | 5.034499000  |

|              |    |              |              |              |
|--------------|----|--------------|--------------|--------------|
|              | 6  | 1.238787000  | -4.090313000 | -2.256943000 |
|              | 1  | 0.346312000  | -4.629877000 | -1.923455000 |
|              | 1  | 1.171109000  | -3.879688000 | -3.325554000 |
|              | 1  | 2.098916000  | -4.744307000 | -2.070848000 |
|              | 8  | -0.445205000 | 0.095106000  | -0.664570000 |
|              | 6  | -1.352677000 | -0.682932000 | -0.270653000 |
|              | 8  | -1.208870000 | -1.903979000 | 0.116770000  |
|              | 6  | -2.760971000 | -0.151314000 | -0.247736000 |
|              | 6  | -3.806742000 | -0.968480000 | 0.210459000  |
|              | 6  | -3.027620000 | 1.154482000  | -0.685477000 |
|              | 6  | -5.104652000 | -0.460623000 | 0.223572000  |
|              | 6  | -4.336333000 | 1.641912000  | -0.665336000 |
|              | 6  | -5.387361000 | 0.837982000  | -0.209575000 |
|              | 1  | -3.599549000 | -1.978636000 | 0.547492000  |
|              | 1  | -2.210592000 | 1.775117000  | -1.039223000 |
|              | 1  | -4.547522000 | 2.653002000  | -1.005260000 |
|              | 1  | -6.406898000 | 1.214242000  | -0.192159000 |
|              | 17 | -6.421350000 | -1.482352000 | 0.799499000  |
|              | 6  | 0.887047000  | 3.142639000  | 0.122076000  |
|              | 8  | 1.396812000  | 2.090700000  | 0.551097000  |
|              | 7  | 0.686680000  | 4.256773000  | 0.850165000  |
|              | 1  | 0.560527000  | 3.216851000  | -0.925510000 |
|              | 6  | 1.068076000  | 4.325331000  | 2.258667000  |
|              | 1  | 1.808651000  | 5.118576000  | 2.410802000  |
|              | 1  | 0.189425000  | 4.542879000  | 2.876160000  |
|              | 1  | 1.494634000  | 3.368945000  | 2.558888000  |
|              | 6  | 0.086616000  | 5.451880000  | 0.263187000  |
|              | 1  | -0.835188000 | 5.715414000  | 0.793678000  |
|              | 1  | 0.780689000  | 6.297514000  | 0.325637000  |
|              | 1  | -0.152190000 | 5.270551000  | -0.786805000 |
| <b>m-CBA</b> | 6  | -0.946333000 | 0.190243000  | -0.000082000 |
|              | 6  | 0.203065000  | -0.618286000 | -0.000114000 |
|              | 6  | -0.826866000 | 1.588242000  | -0.000003000 |
|              | 6  | 1.456238000  | -0.007510000 | 0.000027000  |
|              | 6  | 0.438704000  | 2.178262000  | 0.000158000  |
|              | 6  | 1.590757000  | 1.383837000  | 0.000197000  |
|              | 1  | 0.115800000  | -1.699623000 | -0.000218000 |
|              | 1  | -1.724413000 | 2.199835000  | -0.000066000 |
|              | 1  | 0.536621000  | 3.260989000  | 0.000232000  |
|              | 1  | 2.577769000  | 1.839487000  | 0.000285000  |
|              | 6  | -2.312808000 | -0.409905000 | -0.000181000 |
|              | 8  | -3.348624000 | 0.242619000  | 0.000003000  |
|              | 8  | -2.302648000 | -1.759575000 | -0.000075000 |
|              | 1  | -3.243280000 | -2.070310000 | 0.000012000  |



|                |             |              |              |              |
|----------------|-------------|--------------|--------------|--------------|
|                | 17          | 2.901831000  | -1.013178000 | 0.000019000  |
| <b>TS2-b2'</b> | 6           | -2.692919000 | 0.626518000  | 2.036736000  |
|                | 8           | -2.450082000 | 1.401064000  | 1.119811000  |
|                | 6           | -2.742807000 | -1.459667000 | 0.573688000  |
|                | 8           | -2.372821000 | -1.021530000 | -0.523679000 |
|                | 6           | -2.379802000 | -0.870724000 | 1.915605000  |
|                | 1           | -2.853578000 | -1.445718000 | 2.711861000  |
|                | 1           | -1.290155000 | -0.956957000 | 2.020950000  |
|                | 29          | -1.299608000 | 0.683979000  | -0.889968000 |
|                | 17          | -2.802739000 | 1.396805000  | -2.386011000 |
|                | 8           | -0.275792000 | 2.233575000  | -1.296359000 |
|                | 1           | -0.742255000 | 2.821349000  | -1.938643000 |
|                | 8           | -3.511747000 | -2.527553000 | 0.674535000  |
|                | 6           | -3.915920000 | -3.202862000 | -0.570738000 |
|                | 1           | -3.006298000 | -3.513680000 | -1.090107000 |
|                | 1           | -4.444120000 | -2.472631000 | -1.188045000 |
|                | 6           | -4.792239000 | -4.376132000 | -0.180918000 |
|                | 1           | -5.686423000 | -4.040867000 | 0.352233000  |
|                | 1           | -4.247396000 | -5.083808000 | 0.450342000  |
|                | 1           | -5.109121000 | -4.898601000 | -1.088984000 |
|                | 6           | -3.272840000 | 1.082832000  | 3.348223000  |
|                | 1           | -2.647436000 | 0.732695000  | 4.177785000  |
|                | 1           | -3.356420000 | 2.170149000  | 3.371775000  |
|                | 1           | -4.262008000 | 0.629205000  | 3.485894000  |
|                | 8           | 0.164280000  | 0.000485000  | 0.207147000  |
|                | 6           | 0.934231000  | -0.754442000 | -0.526917000 |
|                | 8           | 0.721563000  | -0.995116000 | -1.729217000 |
|                | 6           | 2.127255000  | -1.341228000 | 0.185487000  |
|                | 6           | 2.980827000  | -2.195533000 | -0.529592000 |
|                | 6           | 2.393591000  | -1.052976000 | 1.532547000  |
|                | 6           | 4.085306000  | -2.747957000 | 0.115748000  |
|                | 6           | 3.507359000  | -1.617213000 | 2.160864000  |
|                | 6           | 4.364104000  | -2.471292000 | 1.457417000  |
|                | 1           | 2.770972000  | -2.414957000 | -1.571775000 |
|                | 1           | 1.730626000  | -0.389824000 | 2.079468000  |
|                | 1           | 3.716303000  | -1.395295000 | 3.204801000  |
|                | 1           | 5.230812000  | -2.912488000 | 1.942613000  |
|                | 17          | 5.158611000  | -3.823495000 | -0.782281000 |
|                | 1           | 1.071417000  | 3.086668000  | -0.992466000 |
|                | 6           | 1.952767000  | 3.779089000  | -0.745616000 |
| 8              | 2.899083000 | 3.863357000  | -1.533503000 |              |
| 7              | 1.815246000 | 4.417968000  | 0.426021000  |              |
| 6              | 2.853690000 | 5.330392000  | 0.911693000  |              |
| 1              | 2.426092000 | 6.325409000  | 1.074610000  |              |

|  |   |              |             |             |
|--|---|--------------|-------------|-------------|
|  | 1 | 3.261645000  | 4.961634000 | 1.859074000 |
|  | 1 | 3.651940000  | 5.393882000 | 0.172921000 |
|  | 6 | 0.643895000  | 4.225525000 | 1.281832000 |
|  | 1 | 0.955291000  | 3.836895000 | 2.257607000 |
|  | 1 | 0.130630000  | 5.181585000 | 1.432093000 |
|  | 1 | -0.043278000 | 3.517733000 | 0.817629000 |

**Table S1-3.** Some optimized Cartesian Coordinates of stationary points for the entire catalytic cycle, involved in the discussion on TBPB (**OX-d**) and BP (**OX-e**) as oxidants, computed at IDSCRF (PCM)-B3LYP/DZVP level in formamide with bond lengths in Å.

| Species       | Cartesian coordinates |              |              |              |
|---------------|-----------------------|--------------|--------------|--------------|
| <b>TBPB</b>   | 6                     | -0.342994000 | 0.928640000  | -0.209081000 |
|               | 8                     | -0.131294000 | 2.126291000  | -0.162315000 |
|               | 6                     | -1.685315000 | 0.284612000  | -0.095540000 |
|               | 6                     | -2.792372000 | 1.127362000  | 0.103750000  |
|               | 6                     | -1.871603000 | -1.107382000 | -0.177925000 |
|               | 6                     | -4.073134000 | 0.584230000  | 0.221005000  |
|               | 6                     | -3.155574000 | -1.645046000 | -0.060294000 |
|               | 6                     | -4.256644000 | -0.802307000 | 0.139193000  |
|               | 1                     | -2.638442000 | 2.201009000  | 0.165368000  |
|               | 1                     | -1.022517000 | -1.765752000 | -0.333622000 |
|               | 1                     | -4.927050000 | 1.239774000  | 0.375547000  |
|               | 1                     | -3.297705000 | -2.721326000 | -0.124561000 |
|               | 1                     | -5.254921000 | -1.225065000 | 0.230277000  |
|               | 8                     | 0.627374000  | -0.017834000 | -0.385371000 |
|               | 8                     | 1.936917000  | 0.603069000  | -0.535766000 |
|               | 6                     | 2.928066000  | -0.268492000 | 0.106358000  |
|               | 6                     | 2.951734000  | -1.639846000 | -0.576937000 |
|               | 1                     | 3.768201000  | -2.244025000 | -0.168639000 |
|               | 1                     | 2.016363000  | -2.181482000 | -0.413298000 |
|               | 1                     | 3.108775000  | -1.530692000 | -1.654482000 |
|               | 6                     | 2.646725000  | -0.372239000 | 1.608280000  |
|               | 1                     | 1.704304000  | -0.892413000 | 1.799944000  |
|               | 1                     | 3.447701000  | -0.934358000 | 2.099009000  |
|               | 1                     | 2.596954000  | 0.622728000  | 2.061432000  |
|               | 6                     | 4.218054000  | 0.515499000  | -0.170020000 |
|               | 1                     | 4.178880000  | 1.509763000  | 0.284765000  |
|               | 1                     | 5.066133000  | -0.026479000 | 0.258359000  |
|               | 1                     | 4.387687000  | 0.625928000  | -1.245214000 |
| <b>COM1-d</b> | 6                     | 1.868069000  | -0.574896000 | -2.015245000 |
|               | 8                     | 1.380099000  | 0.356697000  | -1.365691000 |
|               | 6                     | 2.992861000  | -2.000970000 | -0.225711000 |
|               | 8                     | 2.911247000  | -2.798255000 | 0.691438000  |
|               | 6                     | 2.002544000  | -1.953516000 | -1.389044000 |
|               | 1                     | 2.325749000  | -2.695783000 | -2.126821000 |

|              |    |              |              |              |
|--------------|----|--------------|--------------|--------------|
|              | 1  | 1.026907000  | -2.263155000 | -1.003808000 |
|              | 29 | 0.877240000  | 0.446516000  | 0.623377000  |
|              | 17 | 1.861432000  | 0.851171000  | 2.565937000  |
|              | 8  | -1.305697000 | 1.896454000  | 0.437870000  |
|              | 8  | 3.970605000  | -1.097771000 | -0.374210000 |
|              | 6  | 4.972422000  | -1.023127000 | 0.690598000  |
|              | 1  | 5.429565000  | -2.010098000 | 0.799352000  |
|              | 1  | 4.450315000  | -0.766364000 | 1.615556000  |
|              | 6  | 5.983347000  | 0.034778000  | 0.290767000  |
|              | 1  | 5.505165000  | 1.011922000  | 0.175508000  |
|              | 1  | 6.480335000  | -0.227284000 | -0.648110000 |
|              | 1  | 6.746407000  | 0.116051000  | 1.071575000  |
|              | 6  | 2.321216000  | -0.377172000 | -3.431062000 |
|              | 1  | 1.758921000  | -1.046572000 | -4.093851000 |
|              | 1  | 2.184865000  | 0.658612000  | -3.744384000 |
|              | 1  | 3.376167000  | -0.663189000 | -3.518840000 |
|              | 6  | -1.460011000 | 3.054142000  | -0.467551000 |
|              | 6  | -2.705637000 | 3.852991000  | -0.075847000 |
|              | 1  | -2.755998000 | 4.769594000  | -0.671910000 |
|              | 1  | -3.619425000 | 3.281570000  | -0.258350000 |
|              | 1  | -2.670035000 | 4.130595000  | 0.981935000  |
|              | 6  | -0.174128000 | 3.830905000  | -0.157141000 |
|              | 1  | -0.159777000 | 4.743172000  | -0.760849000 |
|              | 1  | -0.128728000 | 4.113498000  | 0.898287000  |
|              | 1  | 0.713973000  | 3.241491000  | -0.403864000 |
|              | 6  | -1.496313000 | 2.580033000  | -1.921564000 |
|              | 1  | -0.614669000 | 1.975271000  | -2.151486000 |
|              | 1  | -2.394804000 | 1.990635000  | -2.124615000 |
|              | 1  | -1.506195000 | 3.446701000  | -2.590185000 |
|              | 8  | -2.479318000 | 1.043384000  | 0.291152000  |
|              | 6  | -2.145827000 | -0.271710000 | 0.336962000  |
|              | 8  | -0.996867000 | -0.685290000 | 0.451712000  |
|              | 6  | -3.344918000 | -1.141003000 | 0.239979000  |
|              | 6  | -4.648112000 | -0.618297000 | 0.143402000  |
|              | 6  | -3.143507000 | -2.532899000 | 0.246959000  |
|              | 6  | -5.737080000 | -1.487141000 | 0.053237000  |
|              | 6  | -4.237191000 | -3.394650000 | 0.156094000  |
|              | 6  | -5.534178000 | -2.873399000 | 0.059112000  |
|              | 1  | -4.811121000 | 0.455141000  | 0.140979000  |
|              | 1  | -2.133793000 | -2.925956000 | 0.323410000  |
|              | 1  | -6.744158000 | -1.083756000 | -0.020601000 |
|              | 1  | -4.079926000 | -4.470616000 | 0.161374000  |
|              | 1  | -6.385948000 | -3.546500000 | -0.010988000 |
| <b>TS1-d</b> | 6  | 1.219087000  | 0.279016000  | 2.297078000  |

|    |              |              |              |
|----|--------------|--------------|--------------|
| 8  | 0.919773000  | -0.798021000 | 1.789243000  |
| 6  | 2.468967000  | 1.194174000  | 0.284226000  |
| 8  | 2.321099000  | 0.265373000  | -0.509945000 |
| 6  | 1.533653000  | 1.501820000  | 1.434213000  |
| 1  | 1.925417000  | 2.326482000  | 2.030355000  |
| 1  | 0.581106000  | 1.812891000  | 0.984471000  |
| 29 | 0.691814000  | -1.161339000 | -0.490987000 |
| 17 | 1.913880000  | -2.735884000 | -1.529706000 |
| 8  | -1.015637000 | -1.973127000 | -0.441375000 |
| 8  | 3.478343000  | 2.051860000  | 0.213420000  |
| 6  | 4.435555000  | 1.878926000  | -0.888197000 |
| 1  | 3.879226000  | 1.929856000  | -1.827378000 |
| 1  | 4.877374000  | 0.883892000  | -0.794761000 |
| 6  | 5.467211000  | 2.983173000  | -0.766680000 |
| 1  | 6.000617000  | 2.921847000  | 0.186295000  |
| 1  | 5.001074000  | 3.969356000  | -0.847991000 |
| 1  | 6.196758000  | 2.880029000  | -1.576124000 |
| 6  | 1.260981000  | 0.471456000  | 3.788002000  |
| 1  | 0.618299000  | 1.312852000  | 4.073084000  |
| 1  | 0.943201000  | -0.436410000 | 4.302191000  |
| 1  | 2.280520000  | 0.737871000  | 4.092464000  |
| 8  | -2.452304000 | -0.560951000 | -0.930943000 |
| 6  | -1.776594000 | 0.525895000  | -0.819979000 |
| 8  | -0.515339000 | 0.600094000  | -0.917471000 |
| 6  | -2.570529000 | 1.779086000  | -0.568661000 |
| 6  | -3.900548000 | 1.711201000  | -0.120222000 |
| 6  | -1.975915000 | 3.031482000  | -0.796646000 |
| 6  | -4.622262000 | 2.885401000  | 0.112395000  |
| 6  | -2.702516000 | 4.203716000  | -0.571142000 |
| 6  | -4.025592000 | 4.132640000  | -0.114145000 |
| 1  | -4.358622000 | 0.741144000  | 0.051090000  |
| 1  | -0.949966000 | 3.077759000  | -1.151939000 |
| 1  | -2.239438000 | 5.171545000  | -0.750817000 |
| 1  | -4.589522000 | 5.046018000  | 0.063350000  |
| 1  | -5.648325000 | 2.829484000  | 0.469326000  |
| 6  | -1.598809000 | -3.032675000 | 0.305141000  |
| 6  | -2.285535000 | -2.464473000 | 1.560628000  |
| 1  | -2.714158000 | -3.276451000 | 2.157366000  |
| 1  | -1.564560000 | -1.920573000 | 2.177073000  |
| 1  | -3.087172000 | -1.780457000 | 1.271349000  |
| 6  | -0.446129000 | -3.984465000 | 0.739789000  |
| 1  | -0.892111000 | -4.800786000 | 1.317463000  |
| 1  | 0.070489000  | -4.388070000 | -0.131330000 |
| 1  | 0.273718000  | -3.456735000 | 1.369565000  |

|               |    |              |              |              |
|---------------|----|--------------|--------------|--------------|
|               | 6  | -2.582746000 | -3.788665000 | -0.602900000 |
|               | 1  | -3.375694000 | -3.114386000 | -0.937183000 |
|               | 1  | -2.066074000 | -4.181791000 | -1.483548000 |
|               | 1  | -3.037847000 | -4.624549000 | -0.061585000 |
| <b>INT1-d</b> | 6  | 1.818721000  | 0.312737000  | 2.324903000  |
|               | 8  | 1.775376000  | -0.712402000 | 1.656718000  |
|               | 6  | 1.672136000  | 1.907223000  | 0.343747000  |
|               | 8  | 1.523748000  | 1.124257000  | -0.603926000 |
|               | 6  | 1.277302000  | 1.637893000  | 1.775632000  |
|               | 1  | 1.567321000  | 2.482717000  | 2.401112000  |
|               | 1  | 0.183359000  | 1.546640000  | 1.795084000  |
|               | 29 | 0.762969000  | -0.770596000 | -0.583835000 |
|               | 17 | 2.605497000  | -1.490068000 | -1.591807000 |
|               | 8  | -0.102930000 | -2.372570000 | -0.957193000 |
|               | 8  | 2.203303000  | 3.103799000  | 0.178005000  |
|               | 6  | 2.601747000  | 3.498122000  | -1.184528000 |
|               | 1  | 1.714755000  | 3.440393000  | -1.819805000 |
|               | 1  | 3.338451000  | 2.772931000  | -1.537585000 |
|               | 6  | 3.163988000  | 4.902688000  | -1.097843000 |
|               | 1  | 4.039120000  | 4.937938000  | -0.442791000 |
|               | 1  | 2.413793000  | 5.606118000  | -0.725596000 |
|               | 1  | 3.470212000  | 5.223992000  | -2.098309000 |
|               | 6  | 2.361953000  | 0.341311000  | 3.728027000  |
|               | 1  | 1.622144000  | 0.780150000  | 4.407852000  |
|               | 1  | 2.625505000  | -0.664821000 | 4.056665000  |
|               | 1  | 3.245973000  | 0.989711000  | 3.763565000  |
|               | 8  | -0.853059000 | -0.073044000 | 0.186517000  |
|               | 6  | -1.653218000 | 0.366188000  | -0.755160000 |
|               | 8  | -1.352984000 | 0.383779000  | -1.960066000 |
|               | 6  | -2.983708000 | 0.868248000  | -0.262614000 |
|               | 6  | -3.860206000 | 1.477400000  | -1.175754000 |
|               | 6  | -3.364457000 | 0.738894000  | 1.083701000  |
|               | 6  | -5.102909000 | 1.951743000  | -0.747802000 |
|               | 6  | -4.609375000 | 1.212063000  | 1.509510000  |
|               | 6  | -5.479811000 | 1.819734000  | 0.595530000  |
|               | 1  | -3.558412000 | 1.572651000  | -2.215032000 |
|               | 1  | -2.687113000 | 0.265656000  | 1.788248000  |
|               | 1  | -5.777740000 | 2.422738000  | -1.459322000 |
|               | 1  | -4.901246000 | 1.107130000  | 2.552204000  |
|               | 1  | -6.447988000 | 2.188397000  | 0.928074000  |
|               | 6  | -0.171438000 | -3.415184000 | -0.005938000 |
|               | 6  | 1.201123000  | -4.034074000 | 0.302886000  |
|               | 1  | 1.083740000  | -4.911615000 | 0.947564000  |
|               | 1  | 1.707458000  | -4.334060000 | -0.617817000 |

|              |    |              |              |              |
|--------------|----|--------------|--------------|--------------|
|              | 1  | 1.835524000  | -3.309628000 | 0.821717000  |
|              | 6  | -0.904172000 | -3.007095000 | 1.282176000  |
|              | 1  | -1.050015000 | -3.881687000 | 1.925208000  |
|              | 1  | -0.320168000 | -2.269564000 | 1.838980000  |
|              | 1  | -1.879285000 | -2.569489000 | 1.053678000  |
|              | 6  | -1.042827000 | -4.451208000 | -0.793899000 |
|              | 1  | -2.021119000 | -4.027478000 | -1.032920000 |
|              | 1  | -0.542988000 | -4.749480000 | -1.718449000 |
|              | 1  | -1.177580000 | -5.331562000 | -0.156277000 |
| <b>TS2-d</b> | 6  | 1.626474000  | -2.139689000 | 2.203871000  |
|              | 8  | 0.448752000  | -1.855384000 | 2.016245000  |
|              | 6  | 2.372834000  | -2.008619000 | -0.221029000 |
|              | 8  | 1.329403000  | -1.679179000 | -0.785815000 |
|              | 6  | 2.713718000  | -1.697681000 | 1.220218000  |
|              | 1  | 3.684396000  | -2.123578000 | 1.475053000  |
|              | 1  | 2.768380000  | -0.604426000 | 1.300745000  |
|              | 29 | -0.351025000 | -0.650844000 | 0.109179000  |
|              | 17 | -1.697253000 | -2.307736000 | -0.681438000 |
|              | 8  | 3.339370000  | -2.680087000 | -0.834443000 |
|              | 6  | 3.136516000  | -3.013506000 | -2.250994000 |
|              | 1  | 2.979192000  | -2.079800000 | -2.796617000 |
|              | 1  | 2.231459000  | -3.621125000 | -2.326039000 |
|              | 6  | 4.371980000  | -3.756075000 | -2.720936000 |
|              | 1  | 4.518328000  | -4.678590000 | -2.151711000 |
|              | 1  | 5.266891000  | -3.134757000 | -2.623059000 |
|              | 1  | 4.249964000  | -4.019175000 | -3.776385000 |
|              | 6  | 2.082777000  | -2.903036000 | 3.417939000  |
|              | 1  | 2.853132000  | -2.331338000 | 3.949069000  |
|              | 1  | 1.241918000  | -3.107341000 | 4.082056000  |
|              | 1  | 2.550604000  | -3.844124000 | 3.104047000  |
|              | 8  | 0.373604000  | 1.379473000  | -1.592130000 |
|              | 6  | 0.998067000  | 1.581610000  | -0.529605000 |
|              | 8  | 0.905006000  | 0.802432000  | 0.508491000  |
|              | 6  | 1.918708000  | 2.763824000  | -0.381510000 |
|              | 6  | 2.121933000  | 3.621929000  | -1.474767000 |
|              | 6  | 2.577034000  | 3.025152000  | 0.831867000  |
|              | 6  | 2.972940000  | 4.724613000  | -1.357999000 |
|              | 6  | 3.427099000  | 4.129321000  | 0.949102000  |
|              | 6  | 3.627346000  | 4.980489000  | -0.145487000 |
|              | 1  | 1.608706000  | 3.414913000  | -2.409730000 |
|              | 1  | 2.415780000  | 2.362716000  | 1.677176000  |
|              | 1  | 3.932834000  | 4.327034000  | 1.891884000  |
|              | 1  | 4.289344000  | 5.839216000  | -0.054139000 |
|              | 1  | 3.126504000  | 5.384460000  | -2.209298000 |

|               |   |              |              |              |
|---------------|---|--------------|--------------|--------------|
|               | 8 | -5.002629000 | -0.591006000 | -0.149268000 |
|               | 6 | -4.066836000 | -0.038366000 | -0.720300000 |
|               | 7 | -4.013458000 | 0.413873000  | -1.973584000 |
|               | 6 | -2.812762000 | 1.026238000  | -2.544382000 |
|               | 1 | -3.063297000 | 2.015868000  | -2.941093000 |
|               | 1 | -2.030612000 | 1.128765000  | -1.794752000 |
|               | 1 | -2.433657000 | 0.403126000  | -3.361327000 |
|               | 6 | -5.151587000 | 0.221597000  | -2.881092000 |
|               | 1 | -4.870648000 | -0.460206000 | -3.691272000 |
|               | 1 | -5.992401000 | -0.196567000 | -2.328968000 |
|               | 1 | -5.440076000 | 1.185393000  | -3.312506000 |
|               | 8 | -1.918930000 | 0.556839000  | 0.689859000  |
|               | 6 | -2.344957000 | 0.775867000  | 2.056458000  |
|               | 6 | -1.114456000 | 1.301989000  | 2.825331000  |
|               | 1 | -1.420187000 | 1.525385000  | 3.853495000  |
|               | 1 | -0.316204000 | 0.558767000  | 2.851381000  |
|               | 1 | -0.724943000 | 2.212596000  | 2.364588000  |
|               | 6 | -2.852316000 | -0.531664000 | 2.683723000  |
|               | 1 | -3.170474000 | -0.353976000 | 3.716937000  |
|               | 1 | -3.704983000 | -0.928754000 | 2.126910000  |
|               | 1 | -2.060528000 | -1.285534000 | 2.691159000  |
|               | 6 | -3.435694000 | 1.863099000  | 2.044170000  |
|               | 1 | -3.071983000 | 2.761776000  | 1.536624000  |
|               | 1 | -4.341491000 | 1.516047000  | 1.539188000  |
|               | 1 | -3.707640000 | 2.131192000  | 3.070222000  |
|               | 1 | -3.050586000 | 0.183671000  | -0.071298000 |
| <b>INT2-d</b> | 6 | -2.522456000 | -0.848243000 | -0.194325000 |
|               | 8 | -2.073286000 | 0.205528000  | -0.661116000 |
|               | 8 | -3.669330000 | -1.366273000 | -0.592307000 |
|               | 6 | -4.413286000 | -0.654402000 | -1.645409000 |
|               | 6 | -5.668507000 | -1.455255000 | -1.927845000 |
|               | 1 | -3.761126000 | -0.576455000 | -2.518511000 |
|               | 1 | -4.631867000 | 0.350209000  | -1.275961000 |
|               | 1 | -6.244222000 | -0.948424000 | -2.708622000 |
|               | 1 | -5.423995000 | -2.461576000 | -2.279609000 |
|               | 1 | -6.295550000 | -1.534384000 | -1.035227000 |
|               | 6 | -1.432494000 | -0.884553000 | 2.107652000  |
|               | 8 | -0.887769000 | 0.209824000  | 2.006747000  |
|               | 6 | -1.701126000 | -1.526692000 | 3.440274000  |
|               | 1 | -1.265653000 | -2.532674000 | 3.464286000  |
|               | 1 | -1.291546000 | -0.919143000 | 4.248189000  |
|               | 1 | -2.782917000 | -1.648986000 | 3.574249000  |
|               | 6 | -1.840234000 | -1.684881000 | 0.864787000  |
|               | 1 | -0.905166000 | -2.060326000 | 0.427386000  |

|           |    |              |              |              |
|-----------|----|--------------|--------------|--------------|
|           | 1  | -2.466916000 | -2.538520000 | 1.124388000  |
|           | 29 | -0.317622000 | 1.134977000  | -0.070194000 |
|           | 17 | -1.165043000 | 3.213819000  | 0.049639000  |
|           | 6  | 3.288802000  | -0.266185000 | -0.358764000 |
|           | 6  | 4.387258000  | 0.577227000  | -0.118500000 |
|           | 6  | 3.496562000  | -1.614936000 | -0.695112000 |
|           | 6  | 5.685572000  | 0.071930000  | -0.213668000 |
|           | 6  | 4.796788000  | -2.115559000 | -0.789432000 |
|           | 6  | 5.890992000  | -1.273393000 | -0.548845000 |
|           | 1  | 4.216763000  | 1.618658000  | 0.140362000  |
|           | 1  | 2.641057000  | -2.258852000 | -0.879771000 |
|           | 1  | 4.959105000  | -3.158960000 | -1.049699000 |
|           | 1  | 6.903281000  | -1.665246000 | -0.622683000 |
|           | 6  | 1.911381000  | 0.265842000  | -0.258473000 |
|           | 8  | 0.886451000  | -0.476008000 | -0.472491000 |
|           | 8  | 1.688129000  | 1.491526000  | 0.048745000  |
|           | 1  | 6.536446000  | 0.723222000  | -0.027669000 |
| <b>BP</b> | 6  | -1.423008000 | -0.109797000 | -0.570481000 |
|           | 8  | -0.913180000 | -0.851582000 | -1.380525000 |
|           | 6  | -2.865536000 | -0.014504000 | -0.230557000 |
|           | 6  | -3.737069000 | -0.915621000 | -0.868149000 |
|           | 6  | -3.371501000 | 0.927967000  | 0.684092000  |
|           | 6  | -5.104082000 | -0.874977000 | -0.591980000 |
|           | 6  | -4.741035000 | 0.962819000  | 0.954096000  |
|           | 6  | -5.607214000 | 0.063637000  | 0.318773000  |
|           | 1  | -3.335333000 | -1.638760000 | -1.572473000 |
|           | 1  | -2.705524000 | 1.628642000  | 1.178304000  |
|           | 1  | -5.776803000 | -1.572700000 | -1.085047000 |
|           | 1  | -5.133156000 | 1.691470000  | 1.659566000  |
|           | 1  | -6.673389000 | 0.094708000  | 0.532798000  |
|           | 8  | -0.691079000 | 0.796953000  | 0.191687000  |
|           | 8  | 0.691075000  | 0.797103000  | -0.191076000 |
|           | 6  | 1.423021000  | -0.110186000 | 0.570445000  |
|           | 8  | 0.913208000  | -0.852529000 | 1.379984000  |
|           | 6  | 2.865537000  | -0.014656000 | 0.230553000  |
|           | 6  | 3.371468000  | 0.928382000  | -0.683528000 |
|           | 6  | 3.737095000  | -0.916152000 | 0.867575000  |
|           | 6  | 4.740995000  | 0.963417000  | -0.953541000 |
|           | 6  | 5.104103000  | -0.875320000 | 0.591403000  |
|           | 6  | 5.607201000  | 0.063859000  | -0.318786000 |
|           | 1  | 2.705471000  | 1.629347000  | -1.177299000 |
|           | 1  | 3.335384000  | -1.639729000 | 1.571463000  |
|           | 1  | 5.133091000  | 1.692504000  | -1.658574000 |
|           | 1  | 5.776844000  | -1.573335000 | 1.084028000  |



|               |              |              |              |              |
|---------------|--------------|--------------|--------------|--------------|
|               | 1            | 6.673371000  | 0.095077000  | -0.532815000 |
| <b>COMI-e</b> | 6            | -1.154657000 | -1.681756000 | 1.560192000  |
|               | 8            | -1.164540000 | -1.333299000 | 0.373377000  |
|               | 6            | 1.148368000  | -2.831961000 | 1.439608000  |
|               | 8            | 2.344121000  | -2.597301000 | 1.472237000  |
|               | 6            | 0.116531000  | -2.089963000 | 2.278265000  |
|               | 1            | -0.129962000 | -2.708106000 | 3.148853000  |
|               | 1            | 0.579402000  | -1.170573000 | 2.653175000  |
|               | 29           | 0.174000000  | -1.132894000 | -1.016372000 |
|               | 17           | 1.634155000  | -1.249353000 | -2.607434000 |
|               | 8            | -1.159105000 | 2.651649000  | 0.350258000  |
|               | 8            | 0.578573000  | -3.801585000 | 0.709479000  |
|               | 6            | 1.462972000  | -4.589366000 | -0.151824000 |
|               | 1            | 2.212224000  | -5.072579000 | 0.480840000  |
|               | 1            | 1.965933000  | -3.899447000 | -0.834187000 |
|               | 6            | 0.600190000  | -5.595398000 | -0.889446000 |
|               | 1            | -0.148637000 | -5.091299000 | -1.507528000 |
|               | 1            | 0.088665000  | -6.265264000 | -0.191861000 |
|               | 1            | 1.234577000  | -6.201318000 | -1.544323000 |
|               | 6            | -2.424928000 | -1.661505000 | 2.356452000  |
|               | 1            | -2.267370000 | -1.137758000 | 3.306121000  |
|               | 1            | -3.230758000 | -1.192725000 | 1.791078000  |
|               | 1            | -2.700151000 | -2.693481000 | 2.609249000  |
|               | 8            | 0.212576000  | 2.959836000  | 0.058262000  |
|               | 6            | 1.076756000  | 2.052299000  | 0.661116000  |
|               | 8            | 0.689932000  | 1.066766000  | 1.251307000  |
|               | 6            | 2.484204000  | 2.472591000  | 0.454330000  |
|               | 6            | 2.831190000  | 3.711331000  | -0.116795000 |
|               | 6            | 3.489363000  | 1.576517000  | 0.860627000  |
|               | 6            | 4.177366000  | 4.045585000  | -0.275930000 |
|               | 6            | 4.832007000  | 1.917570000  | 0.695861000  |
|               | 6            | 5.177192000  | 3.151347000  | 0.128085000  |
|               | 1            | 2.060423000  | 4.409687000  | -0.428313000 |
|               | 1            | 3.209678000  | 0.623286000  | 1.300039000  |
|               | 1            | 5.608898000  | 1.223840000  | 1.008362000  |
|               | 1            | 6.224722000  | 3.416165000  | 0.001372000  |
|               | 1            | 4.447022000  | 5.003619000  | -0.713872000 |
|               | 6            | -1.701761000 | 1.808056000  | -0.611856000 |
|               | 8            | -1.035150000 | 1.289089000  | -1.483007000 |
|               | 6            | -3.158652000 | 1.648023000  | -0.392284000 |
|               | 6            | -3.817762000 | 0.660460000  | -1.146601000 |
| 6             | -3.881078000 | 2.441369000  | 0.518566000  |              |
| 6             | -5.190341000 | 0.468421000  | -0.989885000 |              |
| 6             | -5.255208000 | 2.243449000  | 0.667841000  |              |

|              |    |              |              |              |
|--------------|----|--------------|--------------|--------------|
|              | 6  | -5.909920000 | 1.258755000  | -0.083181000 |
|              | 1  | -3.248231000 | 0.053132000  | -1.844150000 |
|              | 1  | -3.378944000 | 3.209699000  | 1.098654000  |
|              | 1  | -5.699923000 | -0.296292000 | -1.571325000 |
|              | 1  | -5.815814000 | 2.858092000  | 1.368028000  |
|              | 1  | -6.980625000 | 1.108045000  | 0.036803000  |
| <b>TS1-e</b> | 6  | -0.131137000 | -2.319106000 | 1.669832000  |
|              | 8  | -0.735151000 | -1.981315000 | 0.657354000  |
|              | 6  | 2.211822000  | -2.128169000 | 0.701855000  |
|              | 8  | 1.993388000  | -1.687213000 | -0.423195000 |
|              | 6  | 1.322245000  | -1.894005000 | 1.906813000  |
|              | 1  | 1.742074000  | -2.382524000 | 2.786484000  |
|              | 1  | 1.300519000  | -0.811221000 | 2.084153000  |
|              | 29 | 0.128050000  | -0.630158000 | -1.077816000 |
|              | 17 | 0.008674000  | -1.659554000 | -3.110019000 |
|              | 8  | -1.727602000 | 0.380076000  | -1.224551000 |
|              | 8  | 3.274706000  | -2.870794000 | 1.002866000  |
|              | 6  | 4.226664000  | -3.146997000 | -0.079232000 |
|              | 1  | 4.587875000  | -2.189577000 | -0.463239000 |
|              | 1  | 3.688504000  | -3.663662000 | -0.877849000 |
|              | 6  | 5.342535000  | -3.991869000 | 0.504269000  |
|              | 1  | 4.957671000  | -4.938431000 | 0.894789000  |
|              | 1  | 5.858863000  | -3.461793000 | 1.309893000  |
|              | 1  | 6.070577000  | -4.215264000 | -0.281983000 |
|              | 6  | -0.780231000 | -3.138126000 | 2.752846000  |
|              | 1  | -0.694154000 | -2.619026000 | 3.714849000  |
|              | 1  | -1.829257000 | -3.323357000 | 2.518271000  |
|              | 1  | -0.246076000 | -4.090028000 | 2.860878000  |
|              | 8  | -0.640462000 | 2.617695000  | 0.083205000  |
|              | 6  | 0.556904000  | 2.091900000  | 0.157418000  |
|              | 8  | 0.818383000  | 0.876646000  | 0.181941000  |
|              | 6  | 1.632092000  | 3.131918000  | 0.174699000  |
|              | 6  | 1.376169000  | 4.448659000  | 0.597665000  |
|              | 6  | 2.920742000  | 2.758405000  | -0.246709000 |
|              | 6  | 2.415878000  | 5.381046000  | 0.616459000  |
|              | 6  | 3.950015000  | 3.700477000  | -0.235002000 |
|              | 6  | 3.699900000  | 5.010665000  | 0.197341000  |
|              | 1  | 0.379296000  | 4.732321000  | 0.921589000  |
|              | 1  | 3.104463000  | 1.739077000  | -0.574076000 |
|              | 1  | 4.948035000  | 3.413688000  | -0.558227000 |
|              | 1  | 4.505992000  | 5.741091000  | 0.207801000  |
|              | 1  | 2.223970000  | 6.396383000  | 0.955202000  |
|              | 6  | -2.348545000 | 0.777342000  | -0.223164000 |
|              | 8  | -1.843695000 | 1.518944000  | 0.736307000  |

|               |    |              |              |              |
|---------------|----|--------------|--------------|--------------|
|               | 6  | -3.776928000 | 0.411914000  | 0.026962000  |
|               | 6  | -4.295655000 | -0.721660000 | -0.624156000 |
|               | 6  | -4.592807000 | 1.173422000  | 0.883149000  |
|               | 6  | -5.628743000 | -1.082484000 | -0.425025000 |
|               | 6  | -5.928948000 | 0.810273000  | 1.067538000  |
|               | 6  | -6.446918000 | -0.317669000 | 0.418823000  |
|               | 1  | -3.654462000 | -1.302791000 | -1.280423000 |
|               | 1  | -4.187904000 | 2.046773000  | 1.385454000  |
|               | 1  | -6.032655000 | -1.956724000 | -0.930426000 |
|               | 1  | -6.564634000 | 1.405140000  | 1.719175000  |
|               | 1  | -7.486442000 | -0.601001000 | 0.568962000  |
| <b>INT1-e</b> | 6  | 2.187705000  | -1.124091000 | 2.363378000  |
|               | 8  | 1.136416000  | -1.570745000 | 1.922961000  |
|               | 6  | 3.191418000  | -0.703427000 | 0.059532000  |
|               | 8  | 2.226720000  | -0.983799000 | -0.671639000 |
|               | 6  | 3.103168000  | -0.254069000 | 1.495498000  |
|               | 1  | 4.106745000  | -0.179433000 | 1.916256000  |
|               | 1  | 2.657126000  | 0.749849000  | 1.497253000  |
|               | 29 | 0.269687000  | -1.009859000 | -0.235395000 |
|               | 17 | 0.137052000  | -3.130085000 | -0.832476000 |
|               | 8  | -1.560402000 | -0.829557000 | -0.566772000 |
|               | 8  | 4.426452000  | -0.769316000 | -0.385155000 |
|               | 6  | 4.642123000  | -1.167292000 | -1.790884000 |
|               | 1  | 4.100680000  | -0.457857000 | -2.420782000 |
|               | 1  | 4.210237000  | -2.162042000 | -1.920607000 |
|               | 6  | 6.136709000  | -1.143218000 | -2.036512000 |
|               | 1  | 6.656376000  | -1.846386000 | -1.379654000 |
|               | 1  | 6.546622000  | -0.141408000 | -1.880621000 |
|               | 1  | 6.328099000  | -1.435680000 | -3.073672000 |
|               | 6  | 2.637035000  | -1.361879000 | 3.778703000  |
|               | 1  | 2.881777000  | -0.408290000 | 4.260907000  |
|               | 1  | 1.862331000  | -1.882858000 | 4.342644000  |
|               | 1  | 3.557694000  | -1.958196000 | 3.771600000  |
|               | 8  | 0.326038000  | 0.795796000  | 0.329974000  |
|               | 6  | 0.267080000  | 1.646843000  | -0.679636000 |
|               | 8  | 0.292051000  | 1.302042000  | -1.865685000 |
|               | 6  | 0.188795000  | 3.084203000  | -0.251286000 |
|               | 6  | 0.407315000  | 4.083931000  | -1.214022000 |
|               | 6  | -0.098415000 | 3.442937000  | 1.077056000  |
|               | 6  | 0.335777000  | 5.430686000  | -0.851086000 |
|               | 6  | -0.174085000 | 4.792067000  | 1.434785000  |
|               | 6  | 0.044517000  | 5.786704000  | 0.473162000  |
|               | 1  | 0.628094000  | 3.796343000  | -2.238177000 |
|               | 1  | -0.268860000 | 2.668865000  | 1.819388000  |

|              |    |              |              |              |
|--------------|----|--------------|--------------|--------------|
|              | 1  | -0.403621000 | 5.067874000  | 2.461580000  |
|              | 1  | -0.012760000 | 6.836351000  | 0.753632000  |
|              | 1  | 0.503741000  | 6.202662000  | -1.598800000 |
|              | 6  | -2.385066000 | -1.101012000 | 0.429754000  |
|              | 8  | -2.050349000 | -1.422186000 | 1.567959000  |
|              | 6  | -3.827323000 | -0.945089000 | 0.016444000  |
|              | 6  | -4.214699000 | -0.903785000 | -1.333810000 |
|              | 6  | -4.796283000 | -0.845807000 | 1.028767000  |
|              | 6  | -5.566609000 | -0.776846000 | -1.665788000 |
|              | 6  | -6.144832000 | -0.712440000 | 0.690671000  |
|              | 6  | -6.532056000 | -0.678204000 | -0.656100000 |
|              | 1  | -3.464377000 | -0.980903000 | -2.114679000 |
|              | 1  | -4.485699000 | -0.880066000 | 2.069149000  |
|              | 1  | -5.866621000 | -0.754349000 | -2.711005000 |
|              | 1  | -6.894035000 | -0.639775000 | 1.475951000  |
|              | 1  | -7.583403000 | -0.576492000 | -0.916727000 |
| <b>TS2-e</b> | 6  | 2.643797000  | -0.846731000 | 2.717859000  |
|              | 8  | 1.508691000  | -1.193586000 | 2.410775000  |
|              | 6  | 3.587887000  | -0.844455000 | 0.361436000  |
|              | 8  | 2.589069000  | -1.143182000 | -0.295639000 |
|              | 6  | 3.560993000  | -0.152934000 | 1.706739000  |
|              | 1  | 4.574914000  | -0.042615000 | 2.092071000  |
|              | 1  | 3.132026000  | 0.844089000  | 1.542178000  |
|              | 29 | 0.541246000  | -0.843289000 | 0.305628000  |
|              | 17 | 0.093334000  | -3.047032000 | -0.062597000 |
|              | 8  | -1.495050000 | -0.423425000 | 0.278028000  |
|              | 8  | 4.821295000  | -1.095346000 | -0.054631000 |
|              | 6  | 4.975704000  | -1.738362000 | -1.367490000 |
|              | 1  | 4.492541000  | -1.100799000 | -2.111948000 |
|              | 1  | 4.453707000  | -2.697679000 | -1.333596000 |
|              | 6  | 6.462161000  | -1.897236000 | -1.619346000 |
|              | 1  | 6.927151000  | -2.525485000 | -0.854164000 |
|              | 1  | 6.965914000  | -0.926440000 | -1.633793000 |
|              | 1  | 6.609422000  | -2.375480000 | -2.592820000 |
|              | 6  | 3.194693000  | -1.049113000 | 4.103244000  |
|              | 1  | 3.545954000  | -0.092418000 | 4.507727000  |
|              | 1  | 2.436569000  | -1.478918000 | 4.759230000  |
|              | 1  | 4.068475000  | -1.710400000 | 4.055868000  |
|              | 8  | 0.526281000  | 0.911629000  | -1.780577000 |
|              | 6  | 0.808637000  | 1.589675000  | -0.771174000 |
|              | 8  | 0.915887000  | 1.070249000  | 0.420524000  |
|              | 6  | 1.048001000  | 3.071374000  | -0.866100000 |
|              | 6  | 0.995866000  | 3.698505000  | -2.121961000 |
|              | 6  | 1.321260000  | 3.839207000  | 0.278450000  |

|               |   |              |              |              |
|---------------|---|--------------|--------------|--------------|
|               | 6 | 1.215046000  | 5.074332000  | -2.232725000 |
|               | 6 | 1.539113000  | 5.215914000  | 0.167227000  |
|               | 6 | 1.486934000  | 5.835757000  | -1.088067000 |
|               | 1 | 0.783504000  | 3.098806000  | -3.002686000 |
|               | 1 | 1.359507000  | 3.353778000  | 1.249268000  |
|               | 1 | 1.748891000  | 5.805464000  | 1.057162000  |
|               | 1 | 1.656943000  | 6.907035000  | -1.174118000 |
|               | 1 | -2.261093000 | -1.309185000 | -0.492691000 |
|               | 1 | 1.174006000  | 5.553696000  | -3.208485000 |
|               | 6 | -2.108343000 | 0.059945000  | 1.369527000  |
|               | 8 | -1.505999000 | 0.139858000  | 2.437933000  |
|               | 6 | -3.523779000 | 0.498269000  | 1.197734000  |
|               | 6 | -4.005067000 | 0.963647000  | -0.038094000 |
|               | 6 | -4.376301000 | 0.475566000  | 2.315756000  |
|               | 6 | -5.327306000 | 1.400652000  | -0.152809000 |
|               | 6 | -5.701316000 | 0.897209000  | 2.192921000  |
|               | 6 | -6.178079000 | 1.361381000  | 0.959217000  |
|               | 1 | -3.341498000 | 1.013866000  | -0.897517000 |
|               | 1 | -3.995639000 | 0.119354000  | 3.269456000  |
|               | 1 | -5.693139000 | 1.772705000  | -1.106996000 |
|               | 1 | -6.362259000 | 0.866173000  | 3.056077000  |
|               | 1 | -7.209541000 | 1.694409000  | 0.865856000  |
|               | 8 | -3.776083000 | -2.723536000 | -0.471478000 |
|               | 6 | -2.932810000 | -2.123307000 | -1.136080000 |
|               | 7 | -2.667305000 | -2.198048000 | -2.430021000 |
|               | 6 | -1.582837000 | -1.435806000 | -3.059734000 |
|               | 1 | -1.985796000 | -0.886115000 | -3.915859000 |
|               | 1 | -1.137867000 | -0.730991000 | -2.358887000 |
|               | 1 | -0.807921000 | -2.125942000 | -3.407076000 |
|               | 6 | -3.390472000 | -3.153874000 | -3.285032000 |
|               | 1 | -2.698407000 | -3.924114000 | -3.640258000 |
|               | 1 | -4.195440000 | -3.618739000 | -2.716779000 |
|               | 1 | -3.808016000 | -2.621758000 | -4.144619000 |
| <b>INT2-e</b> | 6 | -2.522456000 | -0.848243000 | -0.194325000 |
|               | 8 | -2.073286000 | 0.205528000  | -0.661116000 |
|               | 8 | -3.669330000 | -1.366273000 | -0.592307000 |
|               | 6 | -4.413286000 | -0.654402000 | -1.645409000 |
|               | 6 | -5.668507000 | -1.455255000 | -1.927845000 |
|               | 1 | -3.761126000 | -0.576455000 | -2.518511000 |
|               | 1 | -4.631867000 | 0.350209000  | -1.275961000 |
|               | 1 | -6.244222000 | -0.948424000 | -2.708622000 |
|               | 1 | -5.423995000 | -2.461576000 | -2.279609000 |
|               | 1 | -6.295550000 | -1.534384000 | -1.035227000 |
|               | 6 | -1.432494000 | -0.884553000 | 2.107652000  |

|  |    |              |              |              |
|--|----|--------------|--------------|--------------|
|  | 8  | -0.887769000 | 0.209824000  | 2.006747000  |
|  | 6  | -1.701126000 | -1.526692000 | 3.440274000  |
|  | 1  | -1.265653000 | -2.532674000 | 3.464286000  |
|  | 1  | -1.291546000 | -0.919143000 | 4.248189000  |
|  | 1  | -2.782917000 | -1.648986000 | 3.574249000  |
|  | 6  | -1.840234000 | -1.684881000 | 0.864787000  |
|  | 1  | -0.905166000 | -2.060326000 | 0.427386000  |
|  | 1  | -2.466916000 | -2.538520000 | 1.124388000  |
|  | 29 | -0.317622000 | 1.134977000  | -0.070194000 |
|  | 17 | -1.165043000 | 3.213819000  | 0.049639000  |
|  | 6  | 3.288802000  | -0.266185000 | -0.358764000 |
|  | 6  | 4.387258000  | 0.577227000  | -0.118500000 |
|  | 6  | 3.496562000  | -1.614936000 | -0.695112000 |
|  | 6  | 5.685572000  | 0.071930000  | -0.213668000 |
|  | 6  | 4.796788000  | -2.115559000 | -0.789432000 |
|  | 6  | 5.890992000  | -1.273393000 | -0.548845000 |
|  | 1  | 4.216763000  | 1.618658000  | 0.140362000  |
|  | 1  | 2.641057000  | -2.258852000 | -0.879771000 |
|  | 1  | 4.959105000  | -3.158960000 | -1.049699000 |
|  | 1  | 6.903281000  | -1.665246000 | -0.622683000 |
|  | 6  | 1.911381000  | 0.265842000  | -0.258473000 |
|  | 8  | 0.886451000  | -0.476008000 | -0.472491000 |
|  | 8  | 1.688129000  | 1.491526000  | 0.048745000  |
|  | 1  | 6.536446000  | 0.723222000  | -0.027669000 |

**Table S1-4.** Some optimized Cartesian Coordinates of stationary points for the reduction process, involved in the discussion on Cu(OAc)<sub>2</sub> as catalyst, computed at IDSCRF (PCM)-B3LYP/DZVP level in formamide with bond lengths in Å.

| Species     | Cartesian coordinates |              |              |              |
|-------------|-----------------------|--------------|--------------|--------------|
| pre-CAT-OAc | 1                     | 1.153542000  | 2.604429000  | 3.638785000  |
|             | 6                     | 0.264235000  | 2.786455000  | 3.033058000  |
|             | 6                     | 0.177542000  | 1.779963000  | 1.904410000  |
|             | 1                     | -0.636170000 | 2.753868000  | 3.647909000  |
|             | 1                     | 0.349001000  | 3.786962000  | 2.594706000  |
|             | 8                     | -0.985126000 | 1.443562000  | 1.513526000  |
|             | 8                     | 1.276113000  | 1.358758000  | 1.421229000  |
|             | 29                    | 1.565818000  | 0.082869000  | -0.027778000 |
|             | 8                     | 2.204020000  | -1.495778000 | 1.079627000  |
|             | 6                     | 2.421831000  | -2.140579000 | -0.004977000 |
|             | 8                     | 2.153180000  | -1.537956000 | -1.102426000 |
|             | 6                     | 2.988819000  | -3.528740000 | 0.008158000  |
|             | 1                     | 2.644026000  | -4.089113000 | -0.863046000 |
|             | 1                     | 4.081385000  | -3.460963000 | -0.038187000 |
|             | 1                     | 2.715578000  | -4.043991000 | 0.930891000  |
|             | 1                     | 1.093182000  | 3.229162000  | -3.151381000 |

|                                        |    |              |              |              |
|----------------------------------------|----|--------------|--------------|--------------|
|                                        | 6  | 0.136560000  | 2.707234000  | -3.100573000 |
|                                        | 6  | 0.103617000  | 1.768786000  | -1.911926000 |
|                                        | 1  | -0.690195000 | 3.417568000  | -3.049660000 |
|                                        | 1  | 0.019464000  | 2.110514000  | -4.011842000 |
|                                        | 8  | -1.038347000 | 1.489763000  | -1.426379000 |
|                                        | 8  | 1.217387000  | 1.306820000  | -1.507245000 |
|                                        | 29 | -1.517709000 | 0.283753000  | 0.034373000  |
|                                        | 8  | -2.376339000 | -1.203925000 | 1.117792000  |
|                                        | 6  | -2.741880000 | -1.759690000 | 0.023668000  |
|                                        | 8  | -2.408890000 | -1.172569000 | -1.064559000 |
|                                        | 6  | -3.546448000 | -3.024907000 | 0.016958000  |
|                                        | 1  | -3.343759000 | -3.600787000 | -0.888044000 |
|                                        | 1  | -3.332696000 | -3.618096000 | 0.908030000  |
|                                        | 1  | -4.610143000 | -2.762096000 | 0.025427000  |
| <b>H<sub>2</sub>O...H<sub>2</sub>O</b> | 8  | -1.491076000 | -0.003500000 | 0.118977000  |
|                                        | 1  | -1.802737000 | 0.024131000  | -0.803628000 |
|                                        | 1  | -0.510635000 | -0.001770000 | 0.053447000  |
|                                        | 8  | 1.338926000  | 0.002640000  | -0.103708000 |
|                                        | 1  | 1.765347000  | -0.781681000 | 0.294718000  |
|                                        | 1  | 1.765225000  | 0.766195000  | 0.333315000  |
| <b>LE-INT1</b>                         | 1  | -2.830542000 | 3.387189000  | 1.936646000  |
|                                        | 6  | -3.478926000 | 3.145846000  | 1.089913000  |
|                                        | 6  | -2.887672000 | 1.998936000  | 0.280763000  |
|                                        | 1  | -4.446350000 | 2.835429000  | 1.498843000  |
|                                        | 1  | -3.620692000 | 4.026688000  | 0.461857000  |
|                                        | 8  | -2.819899000 | 2.088329000  | -0.965308000 |
|                                        | 8  | -2.500013000 | 0.991128000  | 0.995529000  |
|                                        | 29 | -2.077438000 | -0.796219000 | 0.360617000  |
|                                        | 8  | -3.559735000 | -1.154815000 | -1.010449000 |
|                                        | 6  | -3.227952000 | -2.391127000 | -1.026215000 |
|                                        | 8  | -2.262064000 | -2.755699000 | -0.273774000 |
|                                        | 6  | -3.933312000 | -3.368213000 | -1.924770000 |
|                                        | 1  | -3.826866000 | -4.385934000 | -1.544964000 |
|                                        | 1  | -4.988485000 | -3.103641000 | -2.021844000 |
|                                        | 1  | -3.479498000 | -3.319754000 | -2.920841000 |
|                                        | 1  | -0.111631000 | -2.594060000 | 3.918079000  |
|                                        | 6  | 0.645233000  | -1.883170000 | 3.584337000  |
|                                        | 6  | 0.217553000  | -1.202399000 | 2.296580000  |
|                                        | 1  | 0.776490000  | -1.116915000 | 4.356062000  |
|                                        | 1  | 1.606505000  | -2.383188000 | 3.446299000  |
|                                        | 8  | 1.145006000  | -0.621326000 | 1.638296000  |
|                                        | 8  | -1.009177000 | -1.245253000 | 1.990117000  |
|                                        | 29 | 1.051813000  | 0.619488000  | 0.128426000  |
|                                        | 8  | 1.000481000  | 2.308502000  | -0.984257000 |

|               |    |              |              |              |
|---------------|----|--------------|--------------|--------------|
|               | 6  | 1.421412000  | 2.985318000  | 0.020733000  |
|               | 8  | 1.609451000  | 2.354588000  | 1.114556000  |
|               | 6  | 1.707010000  | 4.454001000  | -0.102358000 |
|               | 1  | 1.659135000  | 4.937375000  | 0.875065000  |
|               | 1  | 2.717563000  | 4.582988000  | -0.505449000 |
|               | 1  | 1.004382000  | 4.920652000  | -0.796219000 |
|               | 8  | -0.202804000 | -0.496854000 | -1.046961000 |
|               | 8  | 2.967273000  | -0.089812000 | -0.741257000 |
|               | 6  | 3.709433000  | -0.923091000 | -0.176863000 |
|               | 1  | 3.426931000  | -1.366941000 | 0.787764000  |
|               | 7  | 4.882776000  | -1.351776000 | -0.663943000 |
|               | 6  | 5.406965000  | -0.860754000 | -1.937352000 |
|               | 1  | 4.705402000  | -0.142773000 | -2.359716000 |
|               | 1  | 6.376507000  | -0.375796000 | -1.780178000 |
|               | 1  | 5.539822000  | -1.695747000 | -2.633792000 |
|               | 6  | 5.694850000  | -2.330092000 | 0.057403000  |
|               | 1  | 5.840740000  | -3.226221000 | -0.555252000 |
|               | 1  | 6.675021000  | -1.904592000 | 0.298092000  |
|               | 1  | 5.196780000  | -2.615325000 | 0.986191000  |
|               | 1  | 0.190817000  | -1.342084000 | -1.358125000 |
|               | 1  | -0.528988000 | 0.023914000  | -1.867962000 |
|               | 8  | -1.288412000 | 0.952261000  | -2.880943000 |
|               | 1  | -0.696663000 | 1.670063000  | -3.184506000 |
|               | 1  | -1.911104000 | 1.376388000  | -2.228133000 |
| <b>LE-TS1</b> | 1  | -4.180989000 | 2.546850000  | 2.060500000  |
|               | 6  | -4.443639000 | 2.502970000  | 1.002110000  |
|               | 6  | -3.394639000 | 1.733740000  | 0.223810000  |
|               | 1  | -5.398129000 | 1.971940000  | 0.911440000  |
|               | 1  | -4.571699000 | 3.506850000  | 0.593380000  |
|               | 8  | -3.255659000 | 2.038840000  | -1.009800000 |
|               | 8  | -2.746169000 | 0.839330000  | 0.849200000  |
|               | 29 | -1.897129000 | -0.889410000 | 0.284630000  |
|               | 8  | -3.200069000 | -1.388690000 | -1.200000000 |
|               | 6  | -2.854819000 | -2.619280000 | -1.096660000 |
|               | 8  | -1.984869000 | -2.920580000 | -0.214030000 |
|               | 6  | -3.440509000 | -3.658520000 | -2.011650000 |
|               | 1  | -3.358339000 | -4.651960000 | -1.567040000 |
|               | 1  | -4.483659000 | -3.424300000 | -2.235430000 |
|               | 1  | -2.882989000 | -3.651640000 | -2.954780000 |
|               | 1  | -0.116199000 | -2.264430000 | 4.102210000  |
|               | 6  | 0.581981000  | -1.493220000 | 3.773900000  |
|               | 6  | 0.199591000  | -0.962320000 | 2.403340000  |
|               | 1  | 0.549601000  | -0.663430000 | 4.488490000  |
|               | 1  | 1.602911000  | -1.880630000 | 3.758450000  |



|                |    |              |              |              |
|----------------|----|--------------|--------------|--------------|
|                | 8  | 1.117821000  | -0.371660000 | 1.749860000  |
|                | 8  | -1.004539000 | -1.127550000 | 2.035250000  |
|                | 29 | 1.049001000  | 0.745190000  | 0.113090000  |
|                | 8  | 0.986261000  | 2.462580000  | -1.040030000 |
|                | 6  | 1.578291000  | 3.094600000  | -0.095030000 |
|                | 8  | 1.863171000  | 2.446260000  | 0.966170000  |
|                | 6  | 1.942541000  | 4.544800000  | -0.252360000 |
|                | 1  | 2.168581000  | 4.994160000  | 0.715910000  |
|                | 1  | 2.828201000  | 4.619770000  | -0.892650000 |
|                | 1  | 1.130241000  | 5.085860000  | -0.743770000 |
|                | 8  | -0.216629000 | -0.286920000 | -0.962680000 |
|                | 8  | 2.958961000  | -0.082670000 | -0.749320000 |
|                | 6  | 3.671711000  | -0.908290000 | -0.141120000 |
|                | 1  | 3.384001000  | -1.278700000 | 0.853200000  |
|                | 7  | 4.821911000  | -1.418800000 | -0.608970000 |
|                | 6  | 5.352441000  | -1.033980000 | -1.915490000 |
|                | 1  | 4.674211000  | -0.319250000 | -2.379660000 |
|                | 1  | 6.341111000  | -0.576790000 | -1.798560000 |
|                | 1  | 5.447111000  | -1.917520000 | -2.556180000 |
|                | 6  | 5.599911000  | -2.381010000 | 0.168500000  |
|                | 1  | 5.701781000  | -3.321350000 | -0.384050000 |
|                | 1  | 6.599891000  | -1.983270000 | 0.373070000  |
|                | 1  | 5.100511000  | -2.583100000 | 1.118220000  |
|                | 1  | 0.229821000  | -1.040200000 | -1.398970000 |
|                | 1  | -0.810499000 | 0.589770000  | -1.847880000 |
|                | 8  | -1.371979000 | 1.350760000  | -2.386450000 |
|                | 1  | -0.777369000 | 2.132480000  | -2.438040000 |
|                | 1  | -2.263309000 | 1.628370000  | -1.710420000 |
| <b>LE-INT2</b> | 1  | -4.709644000 | 1.482796000  | 2.134255000  |
|                | 6  | -4.631491000 | 2.164314000  | 1.287521000  |
|                | 6  | -3.467988000 | 1.773714000  | 0.409525000  |
|                | 1  | -5.558113000 | 2.148983000  | 0.706244000  |
|                | 1  | -4.490001000 | 3.187922000  | 1.648448000  |
|                | 8  | -3.365398000 | 2.523087000  | -0.681987000 |
|                | 8  | -2.690497000 | 0.856438000  | 0.686722000  |
|                | 29 | -1.607064000 | -1.082927000 | -0.073573000 |
|                | 8  | -2.763235000 | -1.381433000 | -1.750572000 |
|                | 6  | -3.556560000 | -2.103670000 | -1.051929000 |
|                | 8  | -3.278276000 | -2.266339000 | 0.184094000  |
|                | 6  | -4.759803000 | -2.752187000 | -1.678053000 |
|                | 1  | -5.476916000 | -3.056133000 | -0.913795000 |
|                | 1  | -5.227981000 | -2.069877000 | -2.391472000 |
|                | 1  | -4.434569000 | -3.641030000 | -2.229604000 |
|                | 1  | -0.286077000 | -2.160157000 | 4.103529000  |

|               |    |              |              |              |
|---------------|----|--------------|--------------|--------------|
|               | 6  | 0.616267000  | -2.045918000 | 3.499016000  |
|               | 6  | 0.297786000  | -1.298460000 | 2.216593000  |
|               | 1  | 1.395446000  | -1.533888000 | 4.065221000  |
|               | 1  | 0.972456000  | -3.048410000 | 3.237572000  |
|               | 8  | 1.175275000  | -0.483902000 | 1.790343000  |
|               | 8  | -0.819071000 | -1.563432000 | 1.669938000  |
|               | 29 | 1.177842000  | 0.731556000  | 0.226379000  |
|               | 8  | 1.260283000  | 2.555190000  | -0.782252000 |
|               | 6  | 1.901759000  | 3.040155000  | 0.213613000  |
|               | 8  | 2.128074000  | 2.270244000  | 1.207230000  |
|               | 6  | 2.394836000  | 4.460594000  | 0.197139000  |
|               | 1  | 2.591872000  | 4.812797000  | 1.211112000  |
|               | 1  | 3.328013000  | 4.502931000  | -0.375292000 |
|               | 1  | 1.668128000  | 5.108282000  | -0.298526000 |
|               | 8  | -0.122891000 | -0.154692000 | -0.926004000 |
|               | 8  | 2.998850000  | -0.157288000 | -0.770744000 |
|               | 6  | 3.693300000  | -1.053776000 | -0.248064000 |
|               | 1  | 3.439176000  | -1.463738000 | 0.740243000  |
|               | 7  | 4.784939000  | -1.600772000 | -0.806179000 |
|               | 6  | 5.265718000  | -1.173763000 | -2.118830000 |
|               | 1  | 4.609061000  | -0.394575000 | -2.503426000 |
|               | 1  | 6.285958000  | -0.783610000 | -2.035124000 |
|               | 1  | 5.269593000  | -2.023139000 | -2.810675000 |
|               | 6  | 5.545595000  | -2.647529000 | -0.126876000 |
|               | 1  | 5.562225000  | -3.558986000 | -0.734238000 |
|               | 1  | 6.576681000  | -2.318369000 | 0.041818000  |
|               | 1  | 5.086638000  | -2.875446000 | 0.837324000  |
|               | 1  | 0.352099000  | -0.783868000 | -1.513240000 |
|               | 1  | -0.843255000 | 1.162607000  | -1.812777000 |
|               | 8  | -1.253421000 | 1.998626000  | -2.161754000 |
|               | 1  | -0.570127000 | 2.675523000  | -1.984635000 |
|               | 1  | -2.541877000 | 2.271705000  | -1.229129000 |
| <b>LE-TS2</b> | 1  | 6.275720000  | -0.269282000 | -0.117319000 |
|               | 6  | 5.981100000  | -1.218442000 | -0.564469000 |
|               | 6  | 4.490690000  | -1.242201000 | -0.802849000 |
|               | 1  | 6.508279000  | -1.361892000 | -1.512679000 |
|               | 1  | 6.264399000  | -2.045092000 | 0.094011000  |
|               | 8  | 4.069479000  | -2.390101000 | -1.324929000 |
|               | 8  | 3.749540000  | -0.292651000 | -0.544209000 |
|               | 29 | 1.670670000  | 0.643049000  | 0.183461000  |
|               | 8  | 2.018600000  | 2.414619000  | -0.782369000 |
|               | 6  | 2.612330000  | 2.851049000  | 0.266021000  |
|               | 8  | 2.675040000  | 2.078899000  | 1.280641000  |
|               | 6  | 3.237861000  | 4.218239000  | 0.284011000  |

|                |    |              |              |              |
|----------------|----|--------------|--------------|--------------|
|                | 1  | 3.281921000  | 4.605989000  | 1.303561000  |
|                | 1  | 4.261301000  | 4.141429000  | -0.099639000 |
|                | 1  | 2.683351000  | 4.901489000  | -0.362549000 |
|                | 1  | 1.599449000  | -1.985361000 | 3.787941000  |
|                | 6  | 0.695769000  | -2.256211000 | 3.240501000  |
|                | 6  | 0.481930000  | -1.341281000 | 2.048111000  |
|                | 1  | 0.799789000  | -3.284231000 | 2.876131000  |
|                | 1  | -0.175341000 | -2.225040000 | 3.898911000  |
|                | 8  | -0.679660000 | -1.324270000 | 1.535831000  |
|                | 8  | 1.491610000  | -0.676501000 | 1.645031000  |
|                | 29 | -1.325190000 | -0.375500000 | -0.098589000 |
|                | 8  | -4.626210000 | -1.253990000 | 0.043871000  |
|                | 6  | -3.814751000 | -2.221720000 | -0.331759000 |
|                | 8  | -2.609251000 | -2.045430000 | -0.580149000 |
|                | 6  | -4.467161000 | -3.575320000 | -0.436869000 |
|                | 1  | -3.740241000 | -4.322330000 | -0.755419000 |
|                | 1  | -4.886851000 | -3.854560000 | 0.534541000  |
|                | 1  | -5.296091000 | -3.530040000 | -1.149509000 |
|                | 8  | 0.418410000  | -0.164441000 | -1.063729000 |
|                | 8  | -2.220290000 | 1.171740000  | -0.854839000 |
|                | 6  | -3.367590000 | 1.166800000  | -0.292909000 |
|                | 1  | -4.116480000 | -0.317720000 | 0.017241000  |
|                | 7  | -4.079770000 | 2.292830000  | -0.222609000 |
|                | 6  | -3.613750000 | 3.575250000  | -0.771039000 |
|                | 1  | -2.614170000 | 3.449870000  | -1.184659000 |
|                | 1  | -4.295390000 | 3.914300000  | -1.558679000 |
|                | 1  | -3.590089000 | 4.330280000  | 0.021981000  |
|                | 6  | -5.400440000 | 2.303681000  | 0.406281000  |
|                | 1  | -5.416430000 | 3.021831000  | 1.233511000  |
|                | 1  | -6.166480000 | 2.592691000  | -0.322009000 |
|                | 1  | -5.632550000 | 1.311601000  | 0.794311000  |
|                | 1  | 0.304460000  | 0.454709000  | -1.817429000 |
|                | 1  | 1.047859000  | -1.636421000 | -1.601879000 |
|                | 8  | 1.503949000  | -2.477181000 | -1.893539000 |
|                | 1  | 1.031509000  | -3.209131000 | -1.450009000 |
|                | 1  | 3.065899000  | -2.376441000 | -1.496399000 |
| <b>LE-INT3</b> | 1  | 6.148108000  | -0.637115000 | 0.164654000  |
|                | 6  | 5.773539000  | -1.659187000 | 0.111991000  |
|                | 6  | 4.280048000  | -1.656681000 | -0.109969000 |
|                | 1  | 6.266227000  | -2.192893000 | -0.706644000 |
|                | 1  | 6.010685000  | -2.192177000 | 1.037606000  |
|                | 8  | 3.762743000  | -2.881247000 | -0.145227000 |
|                | 8  | 3.619330000  | -0.626413000 | -0.248771000 |
|                | 29 | 1.568141000  | 0.627860000  | -0.076333000 |

|                 |    |              |              |              |
|-----------------|----|--------------|--------------|--------------|
|                 | 8  | 2.136260000  | 1.891068000  | -1.591363000 |
|                 | 6  | 2.703757000  | 2.644628000  | -0.724995000 |
|                 | 8  | 2.632430000  | 2.304304000  | 0.503594000  |
|                 | 6  | 3.454617000  | 3.876468000  | -1.151072000 |
|                 | 1  | 3.471611000  | 4.613101000  | -0.345533000 |
|                 | 1  | 4.488186000  | 3.595617000  | -1.382176000 |
|                 | 1  | 3.009665000  | 4.303894000  | -2.052016000 |
|                 | 1  | 1.135095000  | -1.172026000 | 3.997607000  |
|                 | 6  | 0.133750000  | -0.835626000 | 3.724428000  |
|                 | 6  | 0.081276000  | -0.393538000 | 2.271329000  |
|                 | 1  | -0.598880000 | -1.624536000 | 3.907707000  |
|                 | 1  | -0.130055000 | 0.019809000  | 4.356301000  |
|                 | 8  | -1.056114000 | -0.360922000 | 1.712460000  |
|                 | 8  | 1.192917000  | -0.060210000 | 1.738791000  |
|                 | 29 | -1.471776000 | 0.031005000  | -0.263549000 |
|                 | 8  | -3.865855000 | -2.564841000 | 0.455367000  |
|                 | 6  | -3.387161000 | -2.555441000 | -0.795086000 |
|                 | 8  | -2.551650000 | -1.744469000 | -1.189878000 |
|                 | 6  | -3.980280000 | -3.640157000 | -1.652419000 |
|                 | 1  | -3.565436000 | -3.588196000 | -2.658271000 |
|                 | 1  | -3.766620000 | -4.617434000 | -1.209259000 |
|                 | 1  | -5.067912000 | -3.527312000 | -1.689074000 |
|                 | 8  | 0.333783000  | -0.521460000 | -1.026951000 |
|                 | 8  | -2.800997000 | 1.592167000  | -1.735690000 |
|                 | 6  | -2.782825000 | 1.453901000  | -0.496279000 |
|                 | 1  | -3.438659000 | -1.833374000 | 0.972908000  |
|                 | 7  | -3.507602000 | 2.182229000  | 0.365586000  |
|                 | 6  | -4.409246000 | 3.242827000  | -0.100339000 |
|                 | 1  | -4.378705000 | 3.291680000  | -1.188339000 |
|                 | 1  | -5.433774000 | 3.032711000  | 0.226478000  |
|                 | 1  | -4.099583000 | 4.207928000  | 0.316319000  |
|                 | 6  | -3.432263000 | 1.981002000  | 1.811020000  |
|                 | 1  | -3.083907000 | 2.898277000  | 2.300533000  |
|                 | 1  | -4.424000000 | 1.732445000  | 2.206889000  |
|                 | 1  | -2.740238000 | 1.170141000  | 2.034823000  |
|                 | 1  | 0.391508000  | -0.317885000 | -1.984579000 |
|                 | 1  | 0.806687000  | -2.101130000 | -0.786850000 |
|                 | 8  | 1.186213000  | -3.018471000 | -0.639660000 |
|                 | 1  | 0.677012000  | -3.407328000 | 0.098381000  |
|                 | 1  | 2.757836000  | -2.862122000 | -0.313007000 |
| <b>LE-INT4a</b> | 1  | 3.309328000  | -3.584921000 | 0.467213000  |
|                 | 6  | 3.530199000  | -2.519165000 | 0.390824000  |
|                 | 6  | 2.263028000  | -1.722020000 | 0.203119000  |
|                 | 1  | 4.065453000  | -2.177060000 | 1.279996000  |

|                 |    |              |              |              |
|-----------------|----|--------------|--------------|--------------|
|                 | 1  | 4.184119000  | -2.354448000 | -0.472446000 |
|                 | 8  | 2.281573000  | -0.452088000 | 0.390245000  |
|                 | 8  | 1.176930000  | -2.278366000 | -0.154535000 |
|                 | 29 | 0.260683000  | -0.348928000 | -0.097304000 |
|                 | 8  | -3.062269000 | -0.106053000 | 0.747018000  |
|                 | 6  | -2.718712000 | -1.043219000 | -0.105388000 |
|                 | 8  | -1.581009000 | -1.146415000 | -0.605112000 |
|                 | 6  | -3.822729000 | -2.000313000 | -0.462489000 |
|                 | 1  | -3.419435000 | -2.868653000 | -0.982814000 |
|                 | 1  | -4.359931000 | -2.307088000 | 0.438392000  |
|                 | 1  | -4.537329000 | -1.486664000 | -1.114516000 |
|                 | 8  | -1.276634000 | 1.718255000  | 0.898619000  |
|                 | 6  | -0.226939000 | 1.546187000  | 0.215067000  |
|                 | 1  | -2.306187000 | 0.588914000  | 0.864276000  |
|                 | 7  | 0.520954000  | 2.591384000  | -0.177579000 |
|                 | 6  | 0.149581000  | 3.971272000  | 0.159996000  |
|                 | 1  | -0.746057000 | 3.962848000  | 0.778786000  |
|                 | 1  | 0.968912000  | 4.452019000  | 0.705750000  |
|                 | 1  | -0.043182000 | 4.541509000  | -0.755801000 |
|                 | 6  | 1.710724000  | 2.447765000  | -1.013513000 |
|                 | 1  | 1.555445000  | 2.949737000  | -1.975638000 |
|                 | 1  | 2.575317000  | 2.902774000  | -0.517529000 |
|                 | 1  | 1.927418000  | 1.394564000  | -1.186371000 |
| <b>LE-INT4b</b> | 1  | -2.391783000 | 3.062036000  | -0.616739000 |
|                 | 6  | -3.079352000 | 2.298412000  | -0.254082000 |
|                 | 6  | -2.344110000 | 1.009237000  | 0.008265000  |
|                 | 1  | -3.585432000 | 2.634959000  | 0.653866000  |
|                 | 1  | -3.848071000 | 2.115443000  | -1.012620000 |
|                 | 8  | -3.024214000 | 0.137121000  | 0.705340000  |
|                 | 8  | -1.192498000 | 0.837121000  | -0.438751000 |
|                 | 29 | 0.483619000  | -0.306890000 | -0.320758000 |
|                 | 8  | 2.465500000  | -0.761568000 | -0.106554000 |
|                 | 6  | 2.683229000  | 0.458139000  | 0.223370000  |
|                 | 8  | 1.682245000  | 1.251528000  | 0.249266000  |
|                 | 6  | 4.063298000  | 0.921735000  | 0.593709000  |
|                 | 1  | 4.171564000  | 1.990641000  | 0.400956000  |
|                 | 1  | 4.214539000  | 0.747241000  | 1.664790000  |
|                 | 1  | 4.818303000  | 0.353557000  | 0.046830000  |
|                 | 8  | -0.248245000 | -1.950938000 | -0.861074000 |
|                 | 1  | 0.470676000  | -2.616257000 | -0.839095000 |
|                 | 1  | -1.345275000 | -2.256880000 | 0.217747000  |
|                 | 8  | -2.073866000 | -2.210987000 | 0.935088000  |
|                 | 1  | -2.758397000 | -2.867100000 | 0.693470000  |
|                 | 1  | -2.580844000 | -0.807188000 | 0.798686000  |

|                |                           |              |              |              |
|----------------|---------------------------|--------------|--------------|--------------|
| <b>CAT-OAc</b> | 29                        | -0.095745000 | 0.069984000  | -0.058271000 |
|                | 8                         | -2.600833000 | -1.392571000 | 0.171894000  |
|                | 6                         | -2.801517000 | -0.170072000 | 0.034231000  |
|                | 8                         | -1.859342000 | 0.724113000  | -0.088386000 |
|                | 6                         | -4.213186000 | 0.400051000  | -0.001422000 |
|                | 1                         | -4.339705000 | 1.127212000  | 0.807092000  |
|                | 1                         | -4.955809000 | -0.392646000 | 0.101093000  |
|                | 1                         | -4.374630000 | 0.934734000  | -0.942829000 |
|                | 8                         | 1.707468000  | -0.562220000 | -0.056298000 |
|                | 6                         | 2.812178000  | -0.001962000 | 0.031228000  |
|                | 8                         | 2.967171000  | 1.305560000  | 0.167236000  |
|                | 6                         | 4.100306000  | -0.766328000 | -0.032224000 |
|                | 1                         | 4.533769000  | -0.634638000 | -1.029864000 |
|                | 1                         | 3.914110000  | -1.826031000 | 0.138666000  |
|                | 1                         | 4.813632000  | -0.373879000 | 0.695581000  |
|                | 1                         | 2.082848000  | 1.766532000  | 0.173680000  |
|                | <b>N...H<sub>2</sub>O</b> | 6            | -0.462641000 | 0.816078000  |
| 8              |                           | -1.076711000 | 1.818594000  | 0.236027000  |
| 7              |                           | -0.921565000 | -0.457876000 | -0.094239000 |
| 6              |                           | -2.203162000 | -0.740034000 | 0.547771000  |
| 1              |                           | -2.867306000 | -1.259439000 | -0.152175000 |
| 1              |                           | -2.055572000 | -1.377730000 | 1.427831000  |
| 1              |                           | -2.667478000 | 0.194756000  | 0.856694000  |
| 6              |                           | -0.147170000 | -1.616258000 | -0.540701000 |
| 1              |                           | 0.326419000  | -2.126970000 | 0.307037000  |
| 1              |                           | -0.821427000 | -2.320519000 | -1.037694000 |
| 1              |                           | 0.621612000  | -1.313943000 | -1.249072000 |
| 8              |                           | 0.801054000  | 0.908883000  | -0.665420000 |
| 1              |                           | 1.007345000  | 1.873630000  | -0.716856000 |
| 8              |                           | 3.233160000  | -0.291703000 | 0.657823000  |
| 1              |                           | 3.680815000  | -0.796331000 | -0.046648000 |
| 1              |                           | 2.444363000  | 0.086777000  | 0.227878000  |

**Table S2-1.** Frequencies of some stationary points for the entire catalytic cycle, involved in the discussion on TBHP (**OX-a**) as oxidant, computed at IDSCRF (PCM)-B3LYP/DZVP level in formamide at 343K.

| <b>Species</b> | <b>Frequencies (cm<sup>-1</sup>)</b> |      |      |      |      |      |      |      |      |      |      |      |      |
|----------------|--------------------------------------|------|------|------|------|------|------|------|------|------|------|------|------|
| <b>1a</b>      | 31                                   | 42   | 79   | 95   | 102  | 187  | 191  | 269  | 317  | 367  | 416  | 473  |      |
|                | 538                                  | 626  | 745  | 815  | 830  | 862  | 887  | 951  | 998  | 1035 | 1058 | 1136 | 1176 |
|                | 1177                                 | 1199 | 1303 | 1304 | 1347 | 1400 | 1402 | 1434 | 1457 | 1474 | 1484 | 1498 | 1504 |
|                | 1522                                 | 1752 | 1777 | 3045 | 3052 | 3070 | 3084 | 3122 | 3132 | 3133 | 3141 | 3155 | 3174 |
| <b>CAT</b>     | 18                                   | 25   | 49   | 57   | 66   | 71   | 126  | 140  | 156  | 179  | 194  | 248  |      |
|                | 270                                  | 333  | 351  | 376  | 415  | 501  | 579  | 615  | 760  | 814  | 840  | 856  |      |
|                | 930                                  | 959  | 1020 | 1031 | 1047 | 1135 | 1169 | 1175 | 1222 | 1292 | 1304 | 1365 | 1400 |
|                | 1407                                 | 1435 | 1460 | 1469 | 1474 | 1497 | 1503 | 1520 | 1700 | 1750 | 3041 | 3053 | 3054 |

|               |                                                                                                                                                                                                                                                                                                                                                                                                                                                                                                           |
|---------------|-----------------------------------------------------------------------------------------------------------------------------------------------------------------------------------------------------------------------------------------------------------------------------------------------------------------------------------------------------------------------------------------------------------------------------------------------------------------------------------------------------------|
|               | 3091 3114 3140 3144 3163 3168 3183                                                                                                                                                                                                                                                                                                                                                                                                                                                                        |
| <b>TBHP</b>   | -221 117 181 236 243 260 341 357 410 461 520 743<br>860 921 928 947 967 1044 1049 1219 1263 1268 1381 1406 1409<br>1430 1483 1497 1499 1508 1509 1533 3047 3048 3055 3130 3133 3137<br>3143 3148 3151 3526                                                                                                                                                                                                                                                                                                |
| <b>COM1-a</b> | 14 19 26 31 36 46 49 56 65 75 80 97<br>112 130 152 158 167 191 199 241 242 249 269 271<br>292 339 355 360 363 408 418 420 466 503 525 569<br>620 746 758 814 841 851 858 892 925 932 933 961<br>967 1020 1033 1044 1051 1052 1135 1170 1175 1208 1234 1268 1282 1292<br>1304 1341 1364 1400 1407 1407 1409 1431 1436 1466 1472 1476 1485<br>1498 1498 1499 1503 1509 1511 1520 1532 1704 1750 3040 3046 3047<br>3049 3054 3054 3089 3114 3132 3135 3139 3139 3143 3143 3144 3149<br>3161 3164 3180 3468   |
| <b>TS1-a</b>  | -218 17 33 35 40 45 60 63 66 89 98 104<br>126 139 144 156 165 194 194 214 251 254 264 270<br>296 322 326 339 356 370 377 417 420 475 498 514<br>574 618 747 758 814 839 863 876 916 920 935 954<br>963 963 1019 1032 1033 1042 1052 1136 1174 1181 1194 1249 1250 1254<br>1298 1304 1373 1388 1397 1400 1410 1417 1437 1463 1469 1476 1482<br>1495 1498 1499 1503 1506 1508 1519 1531 1693 1745 2984 3039 3041<br>3041 3047 3054 3091 3115 3120 3126 3135 3139 3140 3144 3144 3145<br>3156 3163 3181 3577 |
| <b>INT1-a</b> | 16 32 36 62 71 85 102 120 124 144 149 161<br>177 190 253 271 286 336 382 424 484 535 571 607<br>762 769 814 833 853 918 969 1014 1026 1051 1136 1174 1187<br>1212 1305 1313 1382 1401 1419 1438 1452 1469 1477 1497 1502 1518<br>1684 1755 3035 3042 3056 3096 3117 3144 3146 3156 3168 3182 3600                                                                                                                                                                                                         |
| <b>'BuO•</b>  | 178 246 249 323 329 408 413 428 734 868 906 927<br>964 1004 1012 1154 1172 1247 1379 1388 1420 1475 1490 1496 1501 1504<br>1527 3040 3046 3052 3129 3134 3139 3141 3150 3162                                                                                                                                                                                                                                                                                                                              |
| <b>DMF</b>    | 108 157 239 319 338 399 655 869 1013 1080 1105 1128 1176<br>1276 1425 1441 1446 1474 1491 1510 1513 1546 1713 3016 3034 3040<br>3106 3109 3153 3183                                                                                                                                                                                                                                                                                                                                                       |
| <b>INT2-a</b> | 16 21 25 33 49 60 72 78 83 86 105 109<br>131 140 146 151 161 169 180 192 221 236 258 263<br>270 273 340 371 375 382 412 420 487 499 558 610<br>675 759 814 835 840 853 872 919 966 1014 1032 1041<br>1051 1077 1125 1129 1136 1174 1175 1178 1217 1272 1299 1305 1373<br>1397 1399 1412 1436 1446 1454 1456 1471 1471 1479 1491 1498 1502<br>1509 1511 1519 1539 1672 1700 1771 3041 3047 3052 3054 3063 3092<br>3117 3117 3125 3127 3141 3144 3161 3164 3167 3178 3194 3659                              |
| <b>TS2-a</b>  | -1492 32 48 78 91 99 148 150 200 252 252 264<br>270 321 336 377 406 435 438 472 551 677 750 880                                                                                                                                                                                                                                                                                                                                                                                                           |

|                     |                                                                                                                                                                                                                                                                                                                                                                                                                                                                                                                                                                                                                                          |
|---------------------|------------------------------------------------------------------------------------------------------------------------------------------------------------------------------------------------------------------------------------------------------------------------------------------------------------------------------------------------------------------------------------------------------------------------------------------------------------------------------------------------------------------------------------------------------------------------------------------------------------------------------------------|
|                     | 913 915 931 962 1036 1041 1050 1079 1122 1126 1173 1207 1238<br>1252 1263 1392 1403 1423 1430 1444 1468 1484 1491 1495 1497 1498<br>1509 1510 1510 1522 1529 1546 1747 3037 3039 3045 3045 3049 3118<br>3122 3123 3125 3130 3132 3134 3140 3189 3193                                                                                                                                                                                                                                                                                                                                                                                     |
| <b>BuOH</b>         | 197 257 270 340 341 362 419 461 463 746 914 920<br>929 962 1034 1047 1172 1228 1261 1369 1407 1414 1432 1487 1494<br>1497 1510 1517 1528 3030 3034 3046 3110 3116 3127 3129 3131 3138<br>3604                                                                                                                                                                                                                                                                                                                                                                                                                                            |
| <b>(CH3)2N(O)C•</b> | 100 151 244 282 379 395 641 845 1067 1112 1114 1169 1256<br>1414 1442 1467 1491 1503 1509 1535 1781 3041 3046 3116 3123 3172<br>3183                                                                                                                                                                                                                                                                                                                                                                                                                                                                                                     |
| <b>TS3-a</b>        | -1414 12 18 24 30 35 38 39 61 68 72 80<br>86 91 95 99 106 109 113 133 137 140 142 149<br>157 162 176 192 216 249 255 258 260 265 266 295<br>317 366 370 376 382 404 411 427 477 497 571 595<br>660 675 722 764 815 838 851 866 873 921 942 980<br>1021 1042 1048 1054 1074 1079 1117 1119 1123 1130 1136 1170 1174<br>1178 1184 1246 1268 1270 1273 1304 1382 1396 1399 1403 1422 1432<br>1445 1446 1449 1456 1471 1474 1482 1483 1491 1493 1498 1503 1507<br>1510 1510 1511 1520 1539 1540 1666 1672 1729 1785 3043 3045 3050<br>3053 3053 3056 3088 3113 3119 3122 3124 3130 3135 3137 3142 3143<br>3160 3166 3175 3194 3194 3196 3662 |
| <b>INT3</b>         | 13 22 26 45 58 75 82 84 95 105 108 113<br>126 148 158 161 188 215 228 240 247 257 266 298<br>300 324 343 356 390 403 452 479 564 598 641 662<br>748 783 785 817 869 871 973 994 1010 1029 1034 1050 1077<br>1080 1114 1129 1136 1174 1177 1197 1274 1304 1305 1398 1400 1412<br>1430 1444 1445 1449 1474 1480 1491 1494 1497 1504 1510 1512 1520<br>1533 1545 1601 1693 3039 3044 3053 3054 3070 3086 3113 3116 3136<br>3137 3142 3158 3159 3169 3188 3236 3592                                                                                                                                                                          |
| <b>TS4</b>          | -94 16 22 41 50 61 82 91 95 103 124 125<br>127 144 157 161 179 197 213 231 254 268 269 281<br>292 326 364 369 387 407 429 450 527 582 632 672<br>746 774 794 816 871 872 955 974 1004 1022 1035 1051 1074<br>1079 1126 1128 1136 1175 1177 1194 1271 1272 1302 1395 1401 1410<br>1427 1439 1448 1455 1472 1479 1491 1496 1498 1504 1509 1510 1522<br>1541 1547 1613 1679 3046 3051 3051 3053 3080 3093 3124 3126 3131<br>3135 3140 3153 3165 3167 3195 3230 3598                                                                                                                                                                         |
| <b>INT4</b>         | 19 24 32 40 54 75 80 89 93 96 126 129<br>139 153 164 184 188 202 212 238 253 265 269 278<br>304 316 355 373 407 409 419 429 548 576 615 694<br>728 764 812 824 871 874 963 975 992 1009 1032 1051 1071<br>1077 1128 1135 1136 1175 1178 1187 1262 1269 1301 1393 1398 1402<br>1410 1433 1449 1458 1468 1483 1490 1493 1498 1504 1507 1509 1522                                                                                                                                                                                                                                                                                           |



|                           |                                                                                                                                                                                                                                                                                                                                                                                                                                                                  |
|---------------------------|------------------------------------------------------------------------------------------------------------------------------------------------------------------------------------------------------------------------------------------------------------------------------------------------------------------------------------------------------------------------------------------------------------------------------------------------------------------|
|                           | 1537 1552 1659 1677 3048 3050 3053 3057 3075 3126 3129 3134 3136<br>3139 3149 3149 3157 3172 3200 3221 3575                                                                                                                                                                                                                                                                                                                                                      |
| <b>TS5</b>                | -678 21 27 42 56 64 84 89 92 100 113 119<br>139 144 150 158 188 195 203 208 232 266 277 281<br>294 309 371 388 415 430 445 475 497 536 598 620<br>670 683 748 780 783 816 868 936 980 1007 1033 1049 1071<br>1076 1119 1135 1161 1173 1174 1198 1260 1299 1303 1311 1398 1400<br>1422 1429 1440 1448 1468 1480 1491 1493 1497 1504 1504 1507 1519<br>1525 1531 1593 1674 1730 3052 3053 3054 3057 3084 3135 3135 3135<br>3137 3142 3156 3168 3181 3194 3234 3580 |
| <b>INT5</b>               | 20 26 34 42 46 50 62 77 81 89 97 101<br>104 109 130 135 149 154 181 206 225 235 254 274<br>309 312 330 333 361 406 416 427 492 536 553 632<br>732 749 764 813 817 845 870 920 997 1028 1042 1061<br>1080 1085 1132 1137 1148 1174 1175 1201 1259 1286 1303 1378 1407<br>1418 1432 1438 1451 1480 1485 1498 1498 1503 1507 1509 1519 1521<br>1543 1623 1653 1695 1770 3045 3053 3056 3058 3083 3117 3134 3141<br>3142 3143 3156 3172 3183 3197 3223 3599 3688     |
| <b>TS6</b>                | -7 14 28 31 45 51 52 70 76 88 95 102 112<br>120 132 135 157 179 209 225 232 252 272 285 304<br>321 363 396 412 421 484 503 513 551 634 663 725<br>745 766 818 833 868 873 920 985 1023 1052 1062 1074 1085<br>1129 1136 1159 1175 1177 1180 1245 1284 1307 1366 1404 1417 1435<br>1441 1447 1478 1480 1491 1498 1500 1505 1512 1517 1523 1544 1608<br>1690 1723 1755 3040 3042 3045 3051 3075 3108 3114 3115 3128 3140<br>3150 3165 3193 3211 3214 3564 3635     |
| <b>INT6</b>               | 15 19 22 30 39 51 60 77 81 95 99 106<br>119 121 125 152 176 195 220 225 243 273 289 316<br>327 355 370 402 424 451 484 517 552 621 634 724<br>745 768 819 831 837 867 870 923 991 1023 1051 1061<br>1075 1084 1128 1138 1155 1176 1177 1182 1254 1284 1306 1369 1407<br>1417 1434 1439 1449 1478 1480 1490 1498 1500 1506 1513 1514 1523<br>1543 1643 1679 1715 1759 3036 3041 3043 3053 3072 3113 3115 3116<br>3128 3143 3152 3166 3193 3206 3217 3367 3604     |
| <b>3a</b>                 | 20 31 50 59 80 101 102 117 132 146 183 204<br>223 238 273 285 320 363 393 413 491 515 545 633<br>731 747 767 813 836 868 883 917 979 1026 1051 1066 1071<br>1085 1130 1135 1159 1176 1177 1179 1232 1283 1302 1361 1400 1416<br>1433 1441 1449 1480 1482 1494 1497 1503 1504 1512 1516 1523 1545<br>1707 1741 1746 3037 3042 3045 3051 3077 3104 3107 3119 3128 3139<br>3150 3164 3197 3212 3214                                                                 |
| <b>CAT-H<sub>2</sub>O</b> | 21 24 37 40 58 60 71 80 86 103 129 143<br>152 182 212 239 270 281 354 360 373 416 453 502<br>561 615 754 814 838 857 930 959 1018 1032 1048 1135 1162                                                                                                                                                                                                                                                                                                            |

|                           |                                                                                                                                                                                                                                                                                                                                                                                                                                                                                                                                                 |
|---------------------------|-------------------------------------------------------------------------------------------------------------------------------------------------------------------------------------------------------------------------------------------------------------------------------------------------------------------------------------------------------------------------------------------------------------------------------------------------------------------------------------------------------------------------------------------------|
|                           | 1175 1226 1290 1304 1357 1400 1406 1436 1462 1471 1476 1498 1503<br>1520 1628 1705 1749 3040 3053 3054 3089 3114 3139 3143 3161 3166<br>3179 3600 3686                                                                                                                                                                                                                                                                                                                                                                                          |
| <b>TS7</b>                | -47 14 23 27 30 38 41 44 49 55 58 74<br>80 95 101 123 133 152 153 168 171 176 192 194<br>246 248 250 266 271 307 339 354 355 369 403 410<br>417 420 467 504 524 575 618 747 761 814 840 853<br>859 915 924 931 935 963 966 1019 1033 1043 1051 1052 1135<br>1174 1178 1209 1240 1268 1284 1294 1304 1359 1372 1400 1407 1407<br>1410 1430 1436 1466 1472 1476 1485 1498 1498 1500 1503 1509 1511<br>1520 1533 1650 1698 1748 3028 3041 3045 3046 3053 3054 3090 3115<br>3130 3133 3138 3139 3141 3143 3143 3149 3159 3162 3180 3499             |
| <b>COM2-a</b>             | 13 17 19 26 34 41 46 54 55 67 70 79<br>83 84 105 110 130 145 152 158 169 189 203 243<br>245 250 269 273 279 300 340 355 361 364 411 418<br>434 458 471 501 528 568 617 747 758 814 839 851<br>858 893 925 931 933 962 968 1019 1033 1044 1051 1052 1135<br>1171 1175 1208 1233 1269 1282 1294 1304 1341 1366 1400 1407 1408<br>1409 1431 1436 1464 1470 1476 1485 1498 1498 1499 1503 1509 1511<br>1520 1533 1678 1701 1749 3040 3047 3048 3049 3054 3054 3090 3115<br>3133 3135 3139 3139 3143 3143 3144 3149 3162 3164 3180 3461 3607<br>3731 |
| <b>DMF-H<sub>2</sub>O</b> | 34 43 78 110 158 161 247 336 349 361 400 655<br>666 871 1017 1080 1115 1128 1177 1275 1426 1446 1449 1474 1492 1510<br>1511 1546 1681 1700 3038 3041 3047 3114 3117 3158 3189 3536 3725                                                                                                                                                                                                                                                                                                                                                         |

**Table S2-2.** Frequencies of some stationary points for the entire catalytic cycle, involved in the discussion on m-CPBA (**OX-b**) as oxidant, computed at IDSCRF (PCM)-B3LYP/DZVP level in formamide at 343K.

| <b>Species</b> | <b>Frequencies (cm<sup>-1</sup>)</b> |    |    |    |    |    |    |    |    |    |    |    |    |     |     |     |     |     |     |     |     |     |     |     |     |     |     |     |     |     |     |     |     |     |     |     |     |     |     |     |     |     |     |     |     |     |     |     |     |     |     |     |     |     |     |      |      |      |      |      |      |      |      |      |      |      |      |      |      |      |      |      |      |      |      |      |      |      |      |      |      |      |      |      |      |      |      |      |      |      |      |      |      |      |      |      |      |      |      |      |      |      |      |      |      |
|----------------|--------------------------------------|----|----|----|----|----|----|----|----|----|----|----|----|-----|-----|-----|-----|-----|-----|-----|-----|-----|-----|-----|-----|-----|-----|-----|-----|-----|-----|-----|-----|-----|-----|-----|-----|-----|-----|-----|-----|-----|-----|-----|-----|-----|-----|-----|-----|-----|-----|-----|-----|-----|-----|------|------|------|------|------|------|------|------|------|------|------|------|------|------|------|------|------|------|------|------|------|------|------|------|------|------|------|------|------|------|------|------|------|------|------|------|------|------|------|------|------|------|------|------|------|------|------|------|------|------|
| <b>COM1-b1</b> | 7                                    | 11 | 14 | 18 | 32 | 34 | 37 | 47 | 58 | 68 | 75 | 80 | 84 | 99  | 117 | 132 | 140 | 142 | 153 | 172 | 186 | 199 | 210 | 235 | 270 | 274 | 276 | 330 | 352 | 359 | 382 | 417 | 422 | 435 | 490 | 498 | 560 | 593 | 616 | 623 | 680 | 682 | 736 | 756 | 808 | 814 | 815 | 838 | 854 | 902 | 926 | 936 | 960 | 975 | 996 | 1011 | 1017 | 1032 | 1050 | 1091 | 1106 | 1136 | 1138 | 1165 | 1175 | 1186 | 1221 | 1278 | 1292 | 1304 | 1315 | 1354 | 1362 | 1399 | 1407 | 1411 | 1436 | 1445 | 1464 | 1471 | 1477 | 1498 | 1503 | 1503 | 1520 | 1612 | 1638 | 1706 | 1708 | 1756 | 3040 | 3054 | 3063 | 3089 | 3115 | 3139 | 3143 | 3161 | 3166 | 3179 | 3197 | 3210 | 3216 | 3233 | 3410 |
| <b>TS1-b1</b>  | -661                                 | 11 | 14 | 23 | 32 | 42 | 50 | 53 | 62 | 72 | 86 | 90 | 99 | 100 | 112 | 118 | 132 | 138 | 153 | 154 | 170 | 185 | 188 | 202 | 234 | 247 | 270 | 291 | 336 | 348 | 367 | 400 | 418 | 420 | 430 | 484 | 497 | 557 | 576 | 616 | 663 | 682 | 712 | 749 | 757 | 811 | 814 | 836 | 845 | 854 | 911 | 923 | 939 | 963 | 998 | 1011 | 1016 | 1031 | 1051 | 1059 | 1100 | 1121 | 1136 | 1163 | 1169 | 1175 | 1186 | 1220 | 1291 | 1296 | 1305 | 1325 | 1355 | 1366 |      |      |      |      |      |      |      |      |      |      |      |      |      |      |      |      |      |      |      |      |      |      |      |      |      |      |      |      |      |      |      |

|                |                                                                                                                                                                                                                                                                                                                                                                                                                                                                                                                                                                                                                                     |
|----------------|-------------------------------------------------------------------------------------------------------------------------------------------------------------------------------------------------------------------------------------------------------------------------------------------------------------------------------------------------------------------------------------------------------------------------------------------------------------------------------------------------------------------------------------------------------------------------------------------------------------------------------------|
|                | 1399 1408 1436 1445 1464 1471 1477 1498 1503 1503 1519 1593 1623<br>1639 1702 1763 3041 3054 3065 3091 3116 3140 3144 3163 3165 3179<br>3197 3209 3217 3244 3468                                                                                                                                                                                                                                                                                                                                                                                                                                                                    |
| <b>INT1-b1</b> | 13 18 25 44 49 59 68 79 83 98 112 124 133<br>146 153 159 185 188 200 212 242 264 271 300 343<br>345 387 401 425 434 455 493 507 536 562 615 668<br>684 749 760 763 814 822 834 853 888 916 921 942<br>970 1000 1011 1015 1026 1053 1092 1112 1136 1170 1173 1179 1182<br>1220 1296 1305 1315 1353 1375 1400 1415 1427 1438 1454 1457 1470<br>1477 1497 1501 1502 1516 1518 1621 1641 1674 1762 3041 3056 3056<br>3095 3117 3144 3146 3163 3168 3180 3195 3210 3218 3219                                                                                                                                                             |
| <b>TS2-b1</b>  | -1329 11 16 20 25 35 37 48 61 68 72 77<br>85 91 99 102 107 115 128 132 147 147 156 162<br>178 186 201 210 252 256 262 274 284 291 318 339<br>372 391 399 408 434 439 453 471 507 536 571 606<br>660 668 684 723 748 763 768 815 822 850 870 887<br>913 916 941 941 986 999 1011 1021 1046 1059 1074 1092 1111<br>1115 1122 1136 1168 1169 1174 1182 1191 1251 1283 1296 1299 1304<br>1352 1365 1396 1403 1419 1431 1432 1446 1448 1449 1473 1478 1482<br>1495 1498 1502 1507 1509 1509 1514 1519 1535 1621 1632 1641 1709<br>1792 3045 3053 3055 3059 3090 3123 3136 3140 3140 3145 3150 3163<br>3177 3189 3193 3195 3209 3218 3219 |
| <b>INT2-b1</b> | 12 14 22 43 54 66 72 86 91 108 110 117 146<br>166 187 196 219 228 231 256 266 295 304 317 337<br>393 408 435 455 465 495 504 593 595 648 670 682<br>743 746 752 786 792 814 817 863 870 913 939 983<br>999 1010 1012 1030 1049 1073 1092 1108 1135 1153 1173 1179 1193<br>1261 1305 1307 1311 1350 1394 1398 1427 1444 1446 1475 1488 1497<br>1500 1502 1515 1526 1588 1613 1635 1664 3054 3057 3091 3141 3141<br>3144 3163 3174 3194 3210 3220 3225 3239                                                                                                                                                                           |
| <b>INT3-b1</b> | 9 12 16 21 26 28 49 54 69 75 81 85<br>89 102 106 110 110 123 136 148 161 168 186 197<br>214 224 231 249 251 266 291 301 318 330 345 352<br>392 401 403 436 453 462 486 505 591 594 644 666<br>669 682 742 746 752 783 787 814 817 865 869 871<br>914 939 982 999 1010 1011 1019 1031 1049 1073 1079 1092 1108<br>1117 1128 1135 1153 1173 1177 1178 1193 1261 1273 1303 1305 1309<br>1349 1395 1398 1420 1428 1443 1444 1446 1450 1474 1477 1491 1491<br>1497 1499 1503 1510 1511 1516 1527 1546 1597 1613 1635 1664 1699<br>3041 3046 3054 3056 3066 3088 3116 3118 3139 3141 3143 3160 3161<br>3173 3190 3193 3210 3221 3226 3238 |
| <b>TS3-b1</b>  | -24 11 17 21 23 29 46 51 55 69 75 93<br>95 100 114 127 132 132 143 149 159 171 177 195<br>199 201 226 248 257 267 269 289 317 320 373 374                                                                                                                                                                                                                                                                                                                                                                                                                                                                                           |

|                |                                                                                                                                                                                                                                                                                                                                                                                                                                                                                                                                                                                                                                     |
|----------------|-------------------------------------------------------------------------------------------------------------------------------------------------------------------------------------------------------------------------------------------------------------------------------------------------------------------------------------------------------------------------------------------------------------------------------------------------------------------------------------------------------------------------------------------------------------------------------------------------------------------------------------|
|                | 389 394 412 422 435 444 454 503 566 583 628 664<br>678 681 730 736 752 772 805 814 817 864 869 872<br>914 938 965 998 1002 1010 1020 1033 1051 1070 1078 1091 1107<br>1128 1133 1136 1154 1174 1177 1178 1192 1255 1269 1270 1303 1305<br>1348 1387 1400 1401 1406 1434 1443 1449 1457 1470 1478 1490 1494<br>1498 1498 1503 1508 1509 1520 1537 1545 1613 1620 1634 1664 1676<br>3051 3052 3054 3055 3081 3103 3131 3132 3133 3137 3141 3154 3168<br>3170 3192 3198 3209 3221 3227 3228                                                                                                                                            |
| <b>INT4-b1</b> | 11 19 20 26 29 43 49 56 64 70 90 92 95<br>102 120 130 135 140 146 152 165 171 192 197 200<br>205 226 241 265 268 273 299 317 323 362 375 390<br>408 410 418 434 436 459 504 547 602 617 666 682<br>693 724 737 752 766 811 815 821 866 870 872 915<br>938 964 996 998 1006 1010 1031 1051 1069 1077 1091 1107 1128<br>1136 1139 1153 1174 1178 1178 1190 1253 1266 1269 1302 1304 1348<br>1381 1392 1400 1404 1433 1443 1450 1458 1467 1480 1490 1493 1497<br>1498 1503 1507 1509 1520 1534 1545 1613 1634 1647 1670 1683 3051<br>3051 3055 3059 3080 3131 3133 3137 3139 3140 3148 3152 3162 3174<br>3192 3202 3209 3220 3223 3229 |
| <b>TS4-b1</b>  | -1278 9 17 20 26 36 41 43 48 65 72 81<br>82 92 98 111 115 120 132 140 155 162 173 191<br>198 208 214 229 266 274 290 297 306 310 321 378<br>395 405 429 429 446 449 465 485 489 575 597 626<br>664 691 692 730 750 761 783 790 816 820 850 867<br>906 931 940 980 998 1010 1011 1032 1049 1065 1076 1095 1111<br>1116 1135 1137 1158 1170 1173 1181 1198 1222 1254 1297 1304 1305<br>1333 1353 1392 1398 1403 1429 1442 1445 1446 1465 1481 1489 1493<br>1497 1503 1503 1505 1506 1515 1520 1531 1553 1596 1613 1639 1644<br>1697 3053 3056 3057 3060 3087 3137 3137 3138 3140 3143 3159 3170<br>3193 3193 3197 3209 3215 3219 3235 |
| <b>INT5-b1</b> | 8 14 17 19 24 25 32 39 51 54 65 72 84<br>96 99 103 110 122 133 136 150 164 165 171 199<br>203 207 223 227 275 292 312 322 346 363 395 406<br>418 421 425 493 494 518 544 550 582 634 654 683<br>702 735 749 756 766 818 819 832 849 867 876 912<br>917 946 988 1003 1011 1026 1048 1065 1070 1085 1096 1114 1127<br>1136 1158 1162 1175 1176 1182 1182 1211 1249 1287 1308 1308 1356<br>1365 1405 1409 1415 1433 1438 1447 1449 1478 1481 1495 1498 1502<br>1505 1508 1510 1515 1521 1542 1614 1640 1677 1688 1720 1749 3034<br>3040 3047 3052 3078 3111 3119 3123 3131 3141 3152 3165 3193 3196<br>3197 3211 3214 3222 3226 3318   |
| <b>CAT-b1</b>  | 11 13 18 36 41 44 54 68 77 78 86 88 104<br>117 138 149 153 159 186 199 206 241 256 272 335<br>354 364 392 414 419 431 500 501 537 563 615 656                                                                                                                                                                                                                                                                                                                                                                                                                                                                                       |

|                |                                                                                                                                                                                                                                                                                                                                                                                                                                                                                                                                                                                                                                                                    |
|----------------|--------------------------------------------------------------------------------------------------------------------------------------------------------------------------------------------------------------------------------------------------------------------------------------------------------------------------------------------------------------------------------------------------------------------------------------------------------------------------------------------------------------------------------------------------------------------------------------------------------------------------------------------------------------------|
|                | 680 706 749 756 796 814 821 838 848 856 915 928<br>944 961 1001 1011 1018 1030 1048 1094 1111 1136 1156 1166 1175<br>1181 1223 1254 1297 1304 1310 1354 1363 1400 1408 1419 1436 1446<br>1462 1470 1476 1497 1503 1507 1519 1614 1641 1691 1699 1746 3040<br>3051 3054 3091 3114 3140 3144 3163 3166 3180 3189 3196 3210 3220<br>3227                                                                                                                                                                                                                                                                                                                              |
| <b>COM1-b2</b> | 8 12 18 25 34 36 42 53 60 64 70 80 86<br>100 109 114 130 137 165 179 191 208 212 272 283<br>291 302 342 357 365 374 401 416 432 471 498 508<br>554 626 665 680 742 750 758 813 820 827 865 891<br>893 907 943 944 960 1002 1011 1013 1029 1052 1085 1102 1134<br>1134 1179 1183 1185 1208 1255 1303 1313 1316 1356 1362 1399 1402<br>1406 1435 1447 1453 1469 1482 1498 1504 1506 1523 1615 1638 1723<br>1746 1761 3044 3051 3064 3085 3122 3129 3136 3140 3159 3179 3197<br>3211 3221 3225 3393                                                                                                                                                                   |
| <b>TS1-b2</b>  | -173 12 17 18 36 44 60 63 70 88 95 99<br>118 124 129 149 152 161 169 190 197 199 245 254<br>271 286 290 342 358 384 394 412 428 430 488 491<br>524 546 564 613 660 682 720 762 764 814 820 834<br>853 860 914 921 933 937 969 997 1010 1015 1028 1053 1090<br>1108 1136 1157 1174 1179 1181 1222 1287 1305 1313 1336 1351 1377<br>1400 1415 1436 1438 1454 1470 1478 1497 1499 1502 1514 1518 1617<br>1635 1680 1761 3041 3054 3055 3095 3117 3143 3145 3161 3167 3180<br>3192 3209 3217 3220 3435                                                                                                                                                                 |
| <b>INT1-b2</b> | 14 18 24 36 39 59 67 73 90 91 101 125<br>135 146 149 158 170 186 194 197 222 239 242 267<br>270 284 329 338 355 403 405 432 432 453 485 510<br>559 567 584 613 669 683 740 758 762 814 817 833<br>848 869 915 919 937 973 997 998 1011 1013 1022 1053 1092<br>1109 1137 1155 1173 1180 1183 1218 1293 1301 1305 1326 1350 1378<br>1400 1418 1436 1449 1458 1470 1478 1497 1497 1501 1516 1613 1636<br>1647 1653 1771 3041 3055 3057 3098 3118 3146 3147 3160 3172 3180<br>3193 3210 3221 3222 3574                                                                                                                                                                 |
| <b>INT2-b2</b> | 9 13 14 20 22 27 31 50 57 67 74 76 83<br>87 96 97 106 111 120 140 143 148 157 162 170<br>187 193 207 216 233 246 258 270 279 304 315 335<br>339 353 355 399 402 406 428 432 439 474 507 550<br>559 581 604 661 666 682 734 758 761 814 817 830<br>844 863 870 911 919 937 972 979 997 1010 1012 1026<br>1026 1051 1080 1090 1106 1112 1128 1137 1154 1173 1177 1178 1181 1202<br>1274 1288 1295 1305 1317 1348 1380 1399 1413 1418 1437 1444 1445<br>1448 1461 1472 1474 1480 1491 1494 1497 1502 1510 1512 1518 1546<br>1612 1633 1656 1668 1702 1782 3037 3041 3043 3056 3064 3070 3097<br>3110 3114 3118 3144 3146 3154 3157 3170 3177 3187 3191 3209 3221 3226 |

|                |                                                                                                                                                                                                                                                                                                                                                                                                                                                                                                                                                                                                                                                                                |
|----------------|--------------------------------------------------------------------------------------------------------------------------------------------------------------------------------------------------------------------------------------------------------------------------------------------------------------------------------------------------------------------------------------------------------------------------------------------------------------------------------------------------------------------------------------------------------------------------------------------------------------------------------------------------------------------------------|
|                | 3585                                                                                                                                                                                                                                                                                                                                                                                                                                                                                                                                                                                                                                                                           |
| <b>TS2-b2</b>  | -1286 14 18 19 30 33 44 53 56 63 77 81<br>87 89 96 99 105 116 127 133 135 141 154 160<br>176 193 195 198 214 232 247 255 262 264 278 295<br>300 344 347 360 378 400 404 421 434 459 488 507<br>573 583 597 629 662 664 682 715 749 759 782 816<br>819 860 866 871 907 919 942 953 968 991 1000 1011<br>1023 1028 1046 1063 1079 1092 1110 1115 1129 1136 1164 1173 1177 1181<br>1196 1273 1276 1295 1304 1332 1350 1387 1392 1404 1405 1432 1444<br>1445 1449 1463 1474 1477 1484 1489 1491 1497 1503 1504 1510 1511<br>1519 1545 1567 1603 1636 1640 1688 1701 3039 3044 3046 3054 3072 3090<br>3114 3117 3125 3139 3143 3159 3160 3162 3172 3188 3193 3210 3225 3228<br>3575 |
| <b>TS2-b2'</b> | -85 9 11 15 17 19 30 45 48 57 65 68<br>72 85 91 95 99 121 124 135 144 150 152 161<br>167 179 190 194 195 213 221 242 255 258 270 297<br>318 340 347 352 400 403 405 425 432 435 445 488<br>510 559 561 612 649 668 685 739 761 761 814 820<br>835 851 862 870 918 921 925 937 970 997 1011 1015<br>1026 1052 1080 1090 1105 1108 1117 1137 1139 1158 1173 1174 1178 1179<br>1220 1255 1293 1305 1314 1336 1349 1375 1386 1399 1415 1431 1437<br>1448 1449 1456 1471 1477 1478 1497 1497 1497 1502 1510 1511 1518<br>1544 1607 1635 1639 1668 1704 1769 2205 3041 3044 3049 3056 3058 3095<br>3117 3118 3124 3144 3145 3162 3168 3179 3179 3189 3191 3209 3221 3221<br>3511     |

**Table S2-3.** Frequencies of some stationary points for the entire catalytic cycle, involved in the discussion on TBPB (**OX-d**) and BP (**OX-e**) as oxidant, computed at IDSCRF (PCM)-B3LYP/DZVP level in formamide at 343K.

| <b>Species</b> | <b>Frequencies (cm<sup>-1</sup>)</b> |    |    |    |     |     |     |     |     |     |     |     |     |     |     |     |     |     |     |     |     |     |     |     |     |     |     |     |     |     |     |     |     |     |     |      |      |      |      |      |      |      |      |      |      |      |      |      |      |      |      |      |      |      |      |      |      |      |      |      |      |      |      |      |      |      |      |      |      |      |      |      |      |      |      |      |      |      |      |      |      |      |      |      |      |      |      |      |      |      |      |      |      |      |      |      |      |      |      |      |      |
|----------------|--------------------------------------|----|----|----|-----|-----|-----|-----|-----|-----|-----|-----|-----|-----|-----|-----|-----|-----|-----|-----|-----|-----|-----|-----|-----|-----|-----|-----|-----|-----|-----|-----|-----|-----|-----|------|------|------|------|------|------|------|------|------|------|------|------|------|------|------|------|------|------|------|------|------|------|------|------|------|------|------|------|------|------|------|------|------|------|------|------|------|------|------|------|------|------|------|------|------|------|------|------|------|------|------|------|------|------|------|------|------|------|------|------|------|------|------|------|------|------|
| <b>TBPB</b>    | 9                                    | 28 | 42 | 67 | 142 | 174 | 187 | 233 | 243 | 253 | 255 | 307 | 347 | 372 | 408 | 425 | 447 | 460 | 469 | 553 | 626 | 674 | 694 | 706 | 751 | 804 | 836 | 856 | 887 | 925 | 933 | 934 | 953 | 971 | 995 | 1012 | 1013 | 1041 | 1046 | 1055 | 1084 | 1109 | 1174 | 1190 | 1206 | 1258 | 1269 | 1291 | 1339 | 1362 | 1409 | 1411 | 1433 | 1476 | 1485 | 1497 | 1499 | 1510 | 1510 | 1519 | 1532 | 1628 | 1647 | 1763 | 3049 | 3050 | 3056 | 3135 | 3138 | 3143 | 3145 | 3147 | 3148 | 3183 | 3193 | 3203 | 3214 | 3218 |      |      |      |      |      |      |      |      |      |      |      |      |      |      |      |      |      |      |      |      |      |      |      |
| <b>COM1-d</b>  | 8                                    | 11 | 18 | 21 | 31  | 34  | 41  | 43  | 46  | 50  | 59  | 63  | 70  | 74  | 80  | 97  | 108 | 123 | 152 | 154 | 162 | 173 | 181 | 197 | 231 | 236 | 249 | 258 | 263 | 267 | 296 | 318 | 350 | 353 | 366 | 379  | 407  | 414  | 432  | 446  | 466  | 481  | 498  | 557  | 589  | 597  | 625  | 676  | 688  | 691  | 706  | 749  | 802  | 818  | 827  | 829  | 854  | 874  | 878  | 924  | 925  | 931  | 936  | 952  | 955  | 975  | 996  | 1013 | 1014 | 1020 | 1029 | 1042 | 1049 | 1053 | 1057 | 1094 | 1116 | 1135 | 1176 | 1177 | 1188 | 1191 | 1200 | 1249 | 1271 | 1274 | 1279 | 1293 | 1308 | 1341 | 1341 | 1364 | 1401 | 1403 | 1411 | 1413 | 1435 | 1436 | 1462 | 1471 | 1477 |

|               |                                                                                                                                                                                                                                                                                                                                                                                                                                                                                                                                                                                                                                                                                                                                                                                                                                                              |
|---------------|--------------------------------------------------------------------------------------------------------------------------------------------------------------------------------------------------------------------------------------------------------------------------------------------------------------------------------------------------------------------------------------------------------------------------------------------------------------------------------------------------------------------------------------------------------------------------------------------------------------------------------------------------------------------------------------------------------------------------------------------------------------------------------------------------------------------------------------------------------------|
|               | 1477 1486 1497 1498 1500 1504 1511 1512 1519 1520 1533 1626 1646<br>1715 1724 1765 3040 3051 3051 3052 3058 3072 3089 3114 3137 3138<br>3139 3140 3141 3143 3149 3149 3152 3161 3179 3186 3196 3204 3216<br>3218                                                                                                                                                                                                                                                                                                                                                                                                                                                                                                                                                                                                                                             |
| <b>TS1-d</b>  | -63 8 19 24 31 32 41 47 58 66 73 86<br>95 103 112 133 138 148 150 159 164 177 187 192<br>209 238 248 262 270 289 294 300 344 348 366 379<br>405 412 421 432 451 481 495 532 561 572 610 625<br>672 697 721 758 759 814 817 828 835 855 858 862<br>920 924 924 951 965 971 994 1009 1012 1016 1030 1038 1041<br>1047 1051 1094 1136 1154 1165 1172 1174 1176 1185 1222 1224 1236 1300<br>1305 1325 1358 1369 1374 1388 1394 1399 1412 1420 1436 1449 1464<br>1470 1477 1479 1493 1497 1498 1498 1502 1504 1506 1516 1519 1529<br>1628 1643 1694 1760 3041 3048 3052 3055 3056 3057 3092 3116 3136<br>3140 3141 3144 3149 3150 3156 3162 3164 3180 3180 3183 3189 3199 3208<br>3211                                                                                                                                                                            |
| <b>INT1-d</b> | 16 22 26 29 35 37 53 65 68 79 89 99<br>104 121 132 143 147 153 160 176 181 193 200 209<br>241 245 269 270 271 276 296 329 342 347 378 393<br>413 426 436 453 456 476 489 559 565 596 612 626<br>690 697 717 750 760 814 819 834 838 846 851 859<br>917 919 923 953 965 970 995 1008 1013 1015 1025 1027 1042<br>1044 1052 1093 1136 1147 1166 1171 1173 1179 1183 1220 1236 1241 1305<br>1307 1319 1336 1358 1374 1376 1399 1403 1415 1425 1437 1455 1471<br>1472 1473 1478 1488 1494 1497 1500 1501 1508 1515 1518 1524 1617<br>1644 1645 1668 1771 3041 3046 3048 3055 3056 3060 3096 3117 3133<br>3138 3144 3145 3146 3152 3154 3162 3163 3169 3179 3179 3188 3199 3212<br>3216                                                                                                                                                                           |
| <b>TS2-d</b>  | -679 16 20 22 25 29 32 34 48 55 60 64<br>69 74 80 85 96 98 106 109 120 126 132 135<br>149 153 154 160 164 176 187 204 213 236 241 259<br>261 269 270 278 300 305 324 347 358 377 395 405<br>413 420 436 451 452 477 496 514 554 559 612 617<br>627 688 698 718 723 758 760 814 824 836 841 855<br>860 867 923 924 925 953 966 970 979 995 1007 1013<br>1016 1030 1041 1048 1051 1052 1076 1091 1103 1121 1136 1142 1152<br>1170 1173 1174 1175 1183 1191 1226 1240 1252 1260 1299 1305 1324<br>1356 1368 1373 1399 1400 1408 1411 1427 1433 1436 1439 1454 1454<br>1471 1472 1478 1480 1486 1494 1497 1497 1498 1502 1506 1512 1513<br>1516 1517 1519 1528 1542 1608 1641 1646 1693 1733 1768 3041 3047<br>3048 3051 3052 3054 3056 3061 3092 3116 3122 3128 3133 3136 3141<br>3143 3144 3145 3154 3164 3164 3173 3177 3179 3187 3190 3198 3204<br>3210 3215 |
| <b>BP</b>     | 19 24 31 37 70 129 153 166 191 272 340 344                                                                                                                                                                                                                                                                                                                                                                                                                                                                                                                                                                                                                                                                                                                                                                                                                   |

|               |                                                                                                                                                                                                                                                                                                                                                                                                                                                                                                                                                                                                                                                                                 |
|---------------|---------------------------------------------------------------------------------------------------------------------------------------------------------------------------------------------------------------------------------------------------------------------------------------------------------------------------------------------------------------------------------------------------------------------------------------------------------------------------------------------------------------------------------------------------------------------------------------------------------------------------------------------------------------------------------|
|               | 406 407 409 443 444 457 506 625 625 673 691 692<br>699 704 707 798 803 852 854 855 856 941 955 955<br>996 996 1004 1013 1014 1014 1015 1041 1051 1059 1106 1109 1176 1176<br>1191 1193 1242 1251 1340 1341 1364 1364 1477 1477 1519 1519 1627<br>1627 1646 1646 1779 1803 3186 3186 3196 3196 3204 3204 3214 3214<br>3219 3219                                                                                                                                                                                                                                                                                                                                                  |
| <b>COM1-e</b> | 12 13 19 21 25 27 28 29 31 36 47 50<br>58 65 68 84 89 116 129 138 158 168 172 177<br>183 203 241 271 274 333 339 343 353 376 406 407<br>413 418 437 439 466 479 510 585 609 625 625 673<br>690 692 700 704 708 718 798 802 816 822 853 855<br>856 858 877 909 936 954 956 956 994 996 1006 1012<br>1013 1014 1015 1016 1031 1041 1051 1054 1060 1107 1109 1135 1176<br>1176 1176 1191 1193 1202 1227 1243 1254 1292 1309 1340 1341 1364<br>1364 1371 1402 1408 1435 1438 1468 1477 1477 1479 1498 1504 1518 1519<br>1521 1626 1627 1646 1646 1723 1762 1766 1796 3041 3052 3067 3087 3116<br>3126 3136 3141 3159 3183 3186 3186 3196 3196 3204 3204 3215 3215 3218<br>3218      |
| <b>TS1-e</b>  | -228 12 16 20 23 31 34 39 44 53 61 68<br>80 81 102 104 111 119 132 140 144 151 162 187<br>194 207 233 258 267 270 271 297 347 362 369 396<br>410 410 418 433 440 495 508 517 557 614 623 624<br>671 681 692 692 716 720 757 799 801 814 836 851<br>852 852 854 855 922 950 951 962 993 993 1011 1011<br>1012 1012 1015 1032 1042 1042 1051 1095 1100 1117 1136 1147 1169 1174<br>1175 1175 1183 1187 1218 1219 1263 1292 1304 1335 1335 1360 1361<br>1368 1399 1408 1436 1461 1471 1474 1474 1478 1498 1503 1510 1511<br>1519 1571 1594 1624 1626 1637 1637 1705 1766 3041 3054 3064 3090 3116<br>3139 3143 3162 3164 3179 3185 3185 3194 3195 3204 3204 3215 3216 3218<br>3218 |
| <b>INT1-e</b> | 13 14 19 20 25 29 37 47 59 66 70 74<br>86 93 109 118 131 141 149 152 161 164 180 187<br>220 235 254 271 272 276 306 337 345 396 408 409<br>419 428 430 460 462 484 563 579 589 609 624 625<br>686 690 693 694 709 715 760 805 814 815 830 832<br>835 849 853 856 915 950 952 972 993 994 1009 1010<br>1012 1012 1013 1022 1041 1042 1052 1095 1095 1136 1137 1141 1172<br>1173 1173 1183 1184 1185 1215 1230 1271 1306 1323 1332 1333 1357<br>1359 1379 1400 1418 1436 1456 1470 1473 1474 1478 1497 1501 1512 1514<br>1516 1621 1622 1637 1641 1643 1656 1686 1771 3041 3055 3056 3098 3118<br>3146 3147 3158 3172 3180 3181 3182 3191 3191 3201 3201 3212 3214 3215<br>3218   |
| <b>TS2-e</b>  | -364 11 15 18 22 26 30 33 38 41 46 56<br>65 66 68 75 81 86 88 95 102 110 123 127                                                                                                                                                                                                                                                                                                                                                                                                                                                                                                                                                                                                |



|                                                                                                                                                                                                                                                                                                                                                                                                                                                                                                                                                                                                                                                                                                                                                                     |
|---------------------------------------------------------------------------------------------------------------------------------------------------------------------------------------------------------------------------------------------------------------------------------------------------------------------------------------------------------------------------------------------------------------------------------------------------------------------------------------------------------------------------------------------------------------------------------------------------------------------------------------------------------------------------------------------------------------------------------------------------------------------|
| 132 136 143 154 155 162 164 177 184 196 226 242<br>249 261 271 278 306 311 345 377 383 401 412 414<br>421 426 439 451 473 495 555 560 562 575 612 625<br>626 635 689 697 698 712 719 737 759 809 814 821<br>824 835 840 855 856 859 923 944 952 953 966 993<br>995 1008 1011 1013 1013 1016 1030 1041 1043 1051 1067 1073 1092<br>1100 1118 1125 1136 1151 1153 1171 1171 1174 1174 1176 1183 1187<br>1223 1243 1290 1302 1305 1324 1334 1355 1361 1364 1373 1399 1412<br>1413 1430 1436 1453 1454 1471 1473 1474 1478 1481 1492 1497 1502<br>1506 1511 1517 1517 1519 1535 1606 1624 1640 1644 1646 1687 1691<br>1706 1767 3041 3055 3056 3059 3059 3092 3116 3137 3141 3141 3144<br>3164 3165 3178 3179 3183 3187 3191 3192 3197 3198 3199 3206 3209<br>3211 3214 |
|---------------------------------------------------------------------------------------------------------------------------------------------------------------------------------------------------------------------------------------------------------------------------------------------------------------------------------------------------------------------------------------------------------------------------------------------------------------------------------------------------------------------------------------------------------------------------------------------------------------------------------------------------------------------------------------------------------------------------------------------------------------------|

**Table S2-4.** Frequencies of some stationary points for the reduction process, involved in the discussion on Cu(OAc)<sub>2</sub> as catalyst, computed at IDSCRF (PCM)-B3LYP/DZVP level in formamide at 343K.

| Species                                | Frequencies (cm <sup>-1</sup> ) |      |      |      |      |      |      |      |      |      |      |      |      |      |
|----------------------------------------|---------------------------------|------|------|------|------|------|------|------|------|------|------|------|------|------|
| <b>pre-CAT-OAc</b>                     | 10                              | 19   | 20   | 23   | 27   | 28   | 36   | 54   | 56   | 63   | 65   | 77   |      |      |
|                                        | 105                             | 107  | 117  | 147  | 173  | 179  | 187  | 190  | 201  | 218  | 230  | 273  |      |      |
|                                        | 285                             | 331  | 335  | 369  | 454  | 459  | 548  | 558  | 610  | 610  | 612  | 616  |      |      |
|                                        | 667                             | 676  | 684  | 687  | 950  | 951  | 951  | 956  | 1020 | 1020 | 1046 | 1047 | 1063 |      |
|                                        | 1063                            | 1067 | 1067 | 1387 | 1388 | 1388 | 1390 | 1443 | 1447 | 1448 | 1449 | 1469 | 1471 |      |
|                                        | 1475                            | 1475 | 1493 | 1494 | 1510 | 1513 | 1518 | 1519 | 1553 | 1597 | 3060 | 3060 | 3062 |      |
|                                        | 3062                            | 3147 | 3147 | 3151 | 3151 | 3181 | 3182 | 3187 | 3187 |      |      |      |      |      |
| <b>H<sub>2</sub>O...H<sub>2</sub>O</b> | 66                              | 215  | 233  | 248  | 384  | 684  | 1632 | 1686 | 3550 | 3627 | 3717 | 3729 |      |      |
| <b>LE-INT1</b>                         | 15                              | 16   | 23   | 27   | 28   | 31   | 32   | 34   | 35   | 38   | 45   | 50   |      |      |
|                                        | 54                              | 61   | 65   | 70   | 74   | 79   | 84   | 104  | 108  | 111  | 117  | 124  |      |      |
|                                        | 133                             | 139  | 145  | 159  | 164  | 178  | 182  | 193  | 202  | 208  | 213  | 242  |      |      |
|                                        | 251                             | 265  | 286  | 295  | 326  | 340  | 359  | 359  | 390  | 394  | 404  | 452  |      |      |
|                                        | 457                             | 489  | 519  | 527  | 543  | 609  | 610  | 611  | 613  | 658  | 662  | 669  |      |      |
|                                        | 673                             | 680  | 682  | 871  | 889  | 934  | 946  | 948  | 950  | 1020 | 1021 | 1025 |      |      |
|                                        | 1034                            | 1044 | 1062 | 1062 | 1066 | 1067 | 1079 | 1121 | 1128 | 1134 | 1178 | 1273 | 1363 |      |
|                                        | 1384                            | 1388 | 1388 | 1413 | 1415 | 1441 | 1446 | 1451 | 1453 | 1456 | 1472 | 1473 | 1476 |      |
|                                        | 1477                            | 1477 | 1489 | 1491 | 1491 | 1505 | 1507 | 1510 | 1511 | 1525 | 1530 | 1545 | 1582 | 1618 |
|                                        | 1642                            | 1687 | 1690 | 2771 | 3044 | 3049 | 3056 | 3059 | 3059 | 3060 | 3087 | 3121 | 3123 | 3139 |
|                                        | 3145                            | 3146 | 3146 | 3162 | 3174 | 3178 | 3179 | 3182 | 3193 | 3308 | 3588 | 3663 |      |      |
| <b>LE-TS1</b>                          | -528                            | 11   | 13   | 14   | 26   | 27   | 29   | 31   | 31   | 34   | 39   | 43   |      |      |
|                                        | 48                              | 57   | 69   | 73   | 78   | 82   | 92   | 97   | 100  | 108  | 113  | 115  |      |      |
|                                        | 130                             | 140  | 143  | 147  | 159  | 164  | 175  | 190  | 196  | 198  | 240  | 250  |      |      |
|                                        | 260                             | 276  | 293  | 308  | 330  | 353  | 356  | 396  | 403  | 420  | 453  | 459  |      |      |
|                                        | 521                             | 538  | 543  | 592  | 609  | 611  | 613  | 616  | 653  | 662  | 668  | 677  |      |      |
|                                        | 678                             | 696  | 777  | 797  | 870  | 940  | 945  | 948  | 950  | 1021 | 1022 | 1023 |      |      |
|                                        | 1043                            | 1046 | 1062 | 1065 | 1066 | 1067 | 1079 | 1119 | 1128 | 1178 | 1230 | 1273 | 1384 |      |
|                                        | 1385                            | 1387 | 1388 | 1416 | 1432 | 1441 | 1446 | 1452 | 1454 | 1456 | 1460 | 1473 | 1474 |      |

|                 |                                                                                                                                                                                                                                                                                                                                                                                                                                                                                                                                                                                                                                                        |
|-----------------|--------------------------------------------------------------------------------------------------------------------------------------------------------------------------------------------------------------------------------------------------------------------------------------------------------------------------------------------------------------------------------------------------------------------------------------------------------------------------------------------------------------------------------------------------------------------------------------------------------------------------------------------------------|
|                 | 1474 1476 1478 1491 1492 1495 1501 1503 1510 1511 1528 1534 1545 1578<br>1630 1689 1693 1732 1870 3043 3048 3058 3059 3059 3060 3079 3119 3121<br>3144 3145 3145 3146 3162 3178 3178 3181 3182 3192 3595 3654                                                                                                                                                                                                                                                                                                                                                                                                                                          |
| <b>LE-INT2</b>  | 8 10 14 17 20 22 27 28 34 41 44 50 53<br>66 71 73 77 89 95 99 102 109 110 116 124<br>130 131 148 159 162 178 180 191 196 224 250 259<br>273 292 298 330 351 355 376 399 403 446 454 459<br>497 536 544 566 603 610 612 613 619 667 668 678<br>680 870 872 881 914 947 949 951 1021 1021 1022 1029 1043<br>1062 1066 1067 1067 1072 1079 1119 1128 1177 1273 1318 1385 1387<br>1388 1403 1416 1441 1446 1452 1456 1457 1471 1473 1474 1477 1478<br>1485 1486 1491 1492 1504 1505 1510 1511 1531 1532 1545 1578 1692<br>1709 1722 2867 3043 3048 3059 3059 3060 3063 3075 3119 3121 3143<br>3145 3145 3146 3161 3178 3178 3182 3190 3192 3338 3555 3682  |
| <b>LE-TS2</b>   | -125 9 11 16 22 25 30 34 35 39 40 43<br>47 52 61 72 80 83 88 91 94 101 103 108<br>113 128 135 136 154 159 169 180 197 200 206 227<br>251 271 279 298 323 330 370 409 420 430 438 457<br>458 464 517 540 600 603 610 612 616 630 667 675<br>679 681 847 858 880 915 917 946 948 1021 1030 1030<br>1031 1043 1063 1063 1067 1067 1067 1095 1111 1120 1171 1253 1298<br>1314 1361 1384 1387 1403 1416 1436 1442 1455 1457 1472 1472 1475<br>1476 1484 1485 1487 1492 1493 1496 1506 1506 1507 1525 1532 1571 1575<br>1637 1678 1727 1938 2895 3043 3049 3059 3059 3062 3063 3117 3123 3143<br>3144 3144 3145 3177 3178 3181 3189 3189 3192 3228 3570 3674 |
| <b>LE-INT3</b>  | 16 17 21 28 30 31 31 36 39 42 45 45<br>50 55 66 76 79 83 87 91 96 100 107 109<br>120 126 130 138 139 154 169 172 178 199 222 233<br>246 264 272 297 320 321 337 379 414 441 448 458<br>465 494 518 530 548 598 601 611 614 616 651 653<br>663 670 680 806 886 888 890 928 944 949 1020 1022<br>1030 1041 1043 1062 1066 1067 1067 1075 1120 1125 1175 1223 1265<br>1312 1363 1382 1387 1403 1418 1426 1436 1441 1458 1469 1471 1476<br>1476 1478 1484 1484 1487 1494 1499 1506 1509 1513 1533 1534 1577 1623<br>1685 1726 1740 2877 3035 3043 3058 3058 3063 3066 3103 3115 3143 3144<br>3144 3147 3164 3177 3178 3185 3188 3189 3197 3397 3589 3677   |
| <b>LE-INT4a</b> | 15 28 35 41 46 49 77 85 101 117 138 142 147<br>153 167 189 220 262 269 312 389 423 449 476 535<br>602 613 633 671 676 893 921 946 1007 1023 1044 1066 1067<br>1071 1118 1125 1172 1265 1353 1384 1407 1419 1432 1459 1465 1470<br>1473 1485 1490 1494 1498 1507 1510 1526 1555 1579 1670 2583 3040<br>3045 3059 3064 3110 3116 3142 3148 3177 3185 3194 3195                                                                                                                                                                                                                                                                                           |
| <b>LE-INT4b</b> | 24 25 29 39 59 78 98 109 138 159 179 190<br>238 251 311 345 405 426 452 490 513 580 607 610                                                                                                                                                                                                                                                                                                                                                                                                                                                                                                                                                            |

|                           |                                                                                                                                                                                                       |
|---------------------------|-------------------------------------------------------------------------------------------------------------------------------------------------------------------------------------------------------|
|                           | 642 684 838 920 951 1022 1034 1057 1066 1067 1139 1362 1388<br>1412 1454 1473 1475 1486 1506 1518 1529 1641 1679 2384 2807 3060<br>3064 3147 3148 3181 3194 3610 3659                                 |
| <b>CAT-OAc</b>            | 27 34 44 48 62 92 101 164 179 233 333 481<br>521 544 611 620 653 679 906 927 1031 1036 1061 1066 1235<br>1350 1382 1412 1437 1476 1480 1486 1491 1638 1702 3054 3065 3133<br>3152 3170 3200 3315      |
| <b>N...H<sub>2</sub>O</b> | 25 41 77 86 102 118 153 222 230 318 398 436 516<br>566 592 757 780 1033 1085 1130 1144 1177 1286 1301 1445 1449<br>1484 1505 1511 1516 1547 1665 1743 3037 3042 3106 3116 3195 3195<br>3467 3660 3764 |

**Table S3-1.** The total energies ( $E_{\text{tot/a.u.}}=E_{\text{elec/a.u.}}+ZPE/a.u.$ ), zero-point energies (ZPE/a.u.) and Gibbs free energies (G/a.u.) for the entire catalytic cycle, involved in the discussion on TBHP (**OX-a**) as oxidant, computed at IDSCRF(PCM)-B3LYP/DZVP level in formamide at 343K.

| Species                                   | $E_{\text{tot/a.u.}}$ | ZPE/a.u. | G/a.u.      |
|-------------------------------------------|-----------------------|----------|-------------|
| <b>CAT</b>                                | -2560.748721          | 0.158235 | -2560.79165 |
| <b>COM1-a</b>                             | -2869.476457          | 0.297453 | -2869.53858 |
| <b>TS1-a1</b>                             | -2869.460096          | 0.294980 | -2869.51806 |
| <b>INT1-a1</b>                            | -2636.544359          | 0.170155 | -2636.59176 |
| <b>INT2-a1</b>                            | -2885.012453          | 0.275399 | -2885.07329 |
| <b>TS2-a1</b>                             | -481.366744           | 0.221802 | -481.40547  |
| <b>TS3-a1</b>                             | -3132.806023          | 0.361436 | -3132.87983 |
| <b>INT3</b>                               | -2884.366808          | 0.264546 | -2884.42445 |
| <b>TS4</b>                                | -2884.357795          | 0.264156 | -2884.41308 |
| <b>INT4</b>                               | -2884.364675          | 0.264441 | -2884.42129 |
| <b>TS5</b>                                | -2884.328074          | 0.259281 | -2884.38290 |
| <b>INT5</b>                               | -2884.436609          | 0.264551 | -2884.49612 |
| <b>TS6</b>                                | -2884.437018          | 0.265345 | -2884.49446 |
| <b>INT6</b>                               | -2884.438610          | 0.266256 | -2884.49835 |
| <b>CAT-H<sub>2</sub>O</b>                 | -2637.180204          | 0.180883 | -2637.23000 |
| <b>TS7</b>                                | -2945.904163          | 0.320234 | -2945.97087 |
| <b>COM2-a</b>                             | -2945.905480          | 0.320536 | -2945.97439 |
| <b>DMF-H<sub>2</sub>O</b>                 | -324.882970           | 0.126354 | -324.91401  |
| <b>1a</b>                                 | -460.267084           | 0.155746 | -460.30062  |
| <b>3a</b>                                 | -707.523201           | 0.239350 | -707.56856  |
| <b>DMF</b>                                | -248.453761           | 0.102658 | -248.4765   |
| <b>TBHP</b>                               | -308.720775           | 0.137849 | -308.74759  |
| <b>CuCl</b>                               | -2100.443557          | 0.000755 | -2100.45301 |
| <b>C3H9CO•</b>                            | -232.919324           | 0.122418 | -232.94278  |
| <b>(CH<sub>3</sub>)<sub>2</sub>N(O)C•</b> | -247.806897           | 0.090161 | -247.83051  |
| <b>BuOH</b>                               | -233.576649           | 0.135426 | -233.59929  |

**Table S3-2.** The total energies ( $E_{\text{tot/a.u.}}=E_{\text{elec/a.u.}}+ZPE/\text{a.u.}$ ), zero-point energies (ZPE/a.u.) and Gibbs free energies (G/a.u.) for the entire catalytic cycle, involved in the discussion on m-CPBA (**OX-b**) as oxidant, computed at IDSCRF(PCM)-B3LYP/DZVP level in formamide at 343K.

| Species | $E_{\text{tot/a.u.}}$ | ZPE/a.u. | G/a.u.      |
|---------|-----------------------|----------|-------------|
| COM1-b1 | -3516.222326          | 0.265460 | -3516.29181 |
| TS1-b1  | -3516.209066          | 0.263236 | -3516.27432 |
| INT1-b1 | -3440.486740          | 0.253103 | -3440.54691 |
| TS2-b1  | -3688.282133          | 0.339039 | -3688.35752 |
| INT2-b1 | -3439.829199          | 0.241965 | -3439.88687 |
| INT3-b1 | -3688.290560          | 0.345766 | -3688.36483 |
| TS3-b1  | -3688.283018          | 0.345318 | -3688.35407 |
| INT4-b1 | -3688.284053          | 0.345768 | -3688.35579 |
| TS4-b1  | -3688.248417          | 0.340290 | -3688.32037 |
| INT5-b1 | -3688.355556          | 0.346699 | -3688.43224 |
| CAT-ROH | -3441.102133          | 0.263901 | -3441.16545 |
| COM1-b2 | -3516.29904           | 0.265782 | -3516.29904 |
| TS1-b2  | -3516.216932          | 0.264302 | -3516.27903 |
| INT1-b2 | -3516.247065          | 0.266384 | -3516.30866 |
| INT2-b2 | -3764.696888          | 0.369620 | -3764.77591 |
| TS2-b2  | -3764.682491          | 0.365320 | -3764.757   |
| TS2-b2' | -3764.705144          | 0.366938 | -3764.78391 |
| m-CBA   | -880.344689           | 0.104617 | -880.37141  |
| m-CPBA  | -955.478271           | 0.107118 | -955.50838  |

**Table S3-3.** The total energies ( $E_{\text{tot/a.u.}}=E_{\text{elec/a.u.}}+ZPE/\text{a.u.}$ ), zero-point energies (ZPE/a.u.) and Gibbs free energies (G/a.u.) for the entire catalytic cycle, involved in the discussion on TBPB (**OX-d**) and BP (**OX-e**) as oxidant, computed at IDSCRF(PCM)-B3LYP/DZVP level in formamide at 343K.

| Species | $E_{\text{tot/a.u.}}$ | ZPE/a.u. | G/a.u.      |
|---------|-----------------------|----------|-------------|
| TBPB    | -653.065243           | 0.229537 | -653.1058   |
| COM1-d  | -3213.818587          | 0.388317 | -3213.89391 |
| TS1-d   | -3213.800412          | 0.387104 | -3213.86976 |
| INT1-d  | -3213.825792          | 0.388399 | -3213.89385 |
| TS2-d   | -3462.281901          | 0.487019 | -3462.36459 |
| INT2-d  | -2980.915420          | 0.262812 | -2980.97355 |
| BP      | -840.245782           | 0.208094 | -840.28724  |
| COM1-e  | -3400.995947          | 0.366737 | -3401.07415 |
| TS1-e   | -3400.979148          | 0.364677 | -3401.05246 |
| INT1-e  | -3401.022427          | 0.366670 | -3401.09566 |
| TS2-e   | -3649.471928          | 0.464866 | -3649.55894 |
| INT2-e  | -2980.915420          | 0.262812 | -2980.97355 |

**Table S3-4.** The total energies ( $E_{\text{tot/a.u.}}=E_{\text{elec/a.u.}}+ZPE/\text{a.u.}$ ), zero-point energies ( $ZPE/\text{a.u.}$ ) and Gibbs free energies ( $G/\text{a.u.}$ ) for the reduction process, involved in the discussion on  $\text{Cu}(\text{OAc})_2$  as catalyst, computed at IDSCRF(PCM)-B3LYP/DZVP level in formamide at 343K.

| Species                                     | $E_{\text{tot/a.u.}}$ | $ZPE/\text{a.u.}$ | $G/\text{a.u.}$ |
|---------------------------------------------|-----------------------|-------------------|-----------------|
| pre-CAT-OAc                                 | -4194.4863            | 0.102112          | -4194.5514      |
| $\text{H}_2\text{O}\dots\text{H}_2\text{O}$ | -152.85524            | 0.045041          | -152.87081      |
| LE-INT1                                     | -4595.8091            | 0.358786          | -4595.89574     |
| LE-TS1                                      | -4595.8059            | 0.354065          | -4595.89224     |
| LE-INT2                                     | -4595.8152            | 0.359110          | -4595.90541     |
| LE-TS2                                      | -4595.7663            | 0.355331          | -4595.85415     |
| LE-INT3                                     | -4595.7889            | 0.357411          | -4595.87667     |
| LE-INT4a                                    | -2345.6747            | 0.205065          | -2345.72728     |
| LE-INT4b                                    | -2250.0871            | 0.150249          | -2250.13237     |
| CAT-OAc                                     | -2097.8395            | 0.113066          | -2097.87784     |
| $\text{N}\dots\text{H}_2\text{O}$           | -400.135521           | 0.129899          | -400.16913      |

TS(double radical):  $\left[ \begin{array}{c} \text{R}_2 \\ | \\ \text{O}_b \\ \vdots \\ \text{O}_a \\ | \\ \text{R}_1 \end{array} \right]$

| Oxidant<br> | TS(double radical) |            | radical a+<br>radical b |            | Expt.yield(%) |
|-------------|--------------------|------------|-------------------------|------------|---------------|
|             | $\Delta E$         | $\Delta G$ | $\Delta E$              | $\Delta G$ |               |
| <br>(TBHP)  | —                  | —          | 33.5                    | 34.4       | 99            |
| <br>(CPBA)  | —                  | —          | 32.8                    | 32.8       | 20            |
| <br>(DTBP)  | —                  | —          | 24.5                    | 19.1       | n.d           |
| <br>(TBPB)  | 25.4               | 25.3       | 23.8                    | 18.8       | n.r.          |
| <br>(BP)    | 23.8               | 19.1       | 18.6                    | 13.3       | n.d.          |

**Table S4.** The relative energies ( $\Delta E$ , kcal/mol) and Gibbs free energies ( $\Delta G$ , kcal/mol) for different oxidants to form the correspondent radicals.

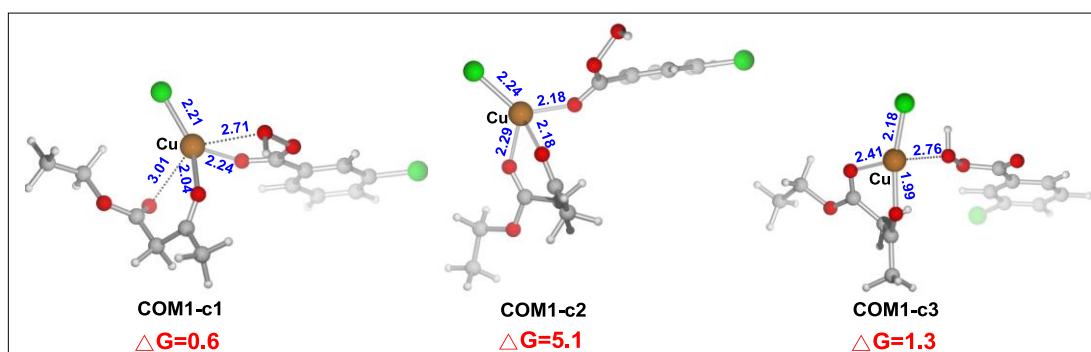

**Scheme S1.** Comparative structures and Gibbs free-energies ( $\Delta G$ , kcal/mol) at B3LYP/DZVP level of theory of the complex COM1-b1, COM1-b2 and COM1-b3.

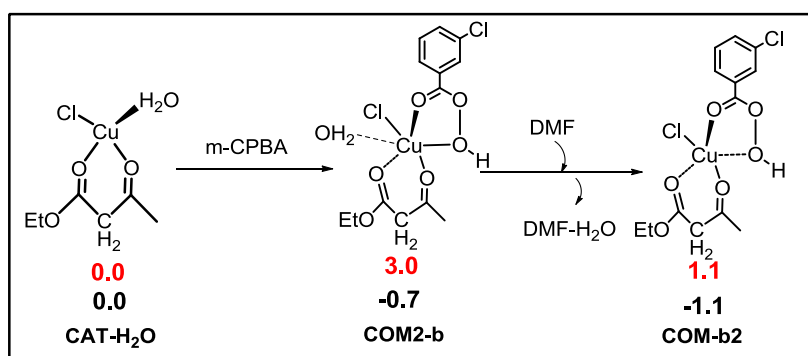

**Figure S1.** The relative energies ( $\Delta E$ , kcal/mol) and Gibbs free energies ( $\Delta G$ , kcal/mol) for the recycling of catalyst step of 1b with the schematic representation of stationary points along the reaction coordinates.

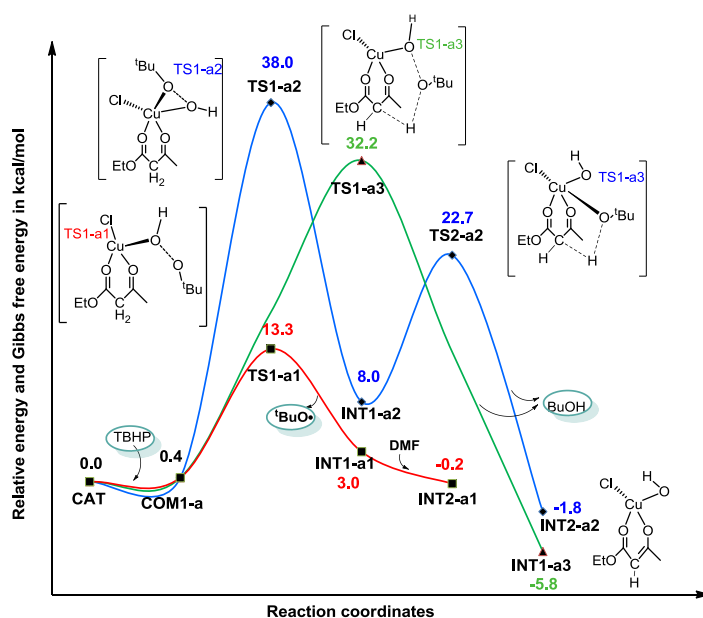

**Figure S2.** Gibbs free-energy profiles ( $\Delta G$ , kcal/mol) for the oxidation step of 1a with the schematic representation of stationary points along the reaction coordinates.

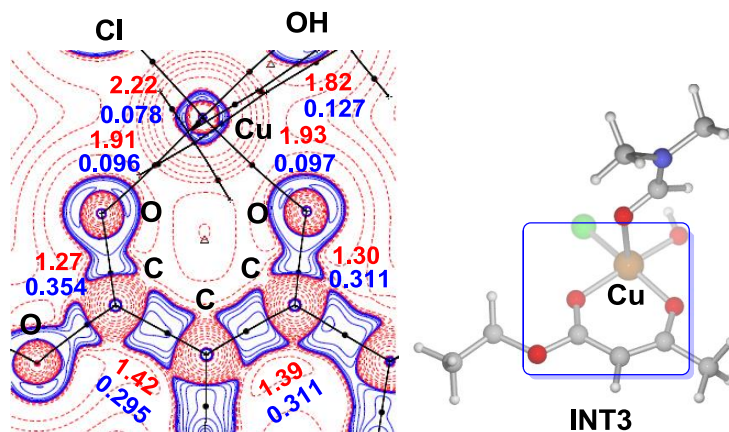

**Figure S3.** ORTEP plot of INT3, in which the weak interatomic interactions are represented by black dashed lines. Depiction of the “onion layer” 2-D isodensity surfaces was provided from the Laplacian of electron densities  $\nabla^2\rho$  in different planes selected, with the bond lengths (Å), bond paths, electron densities ( $\rho_b$  in au), and bond critical points shown in red text, solid black lines, blue text, and small black dots, respectively.

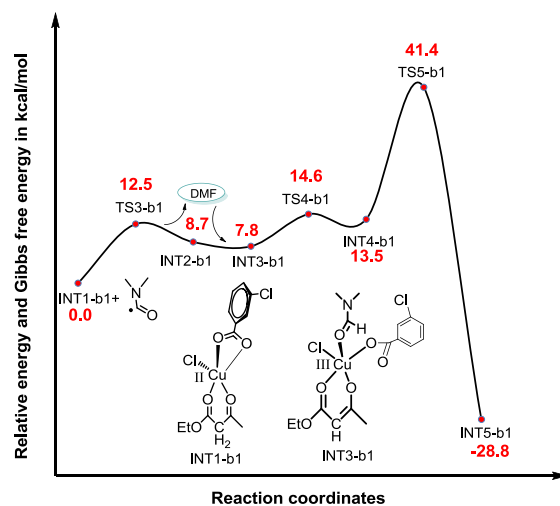

**Figure S4.** Gibbs free-energy profiles ( $\Delta G$ , kcal/mol) for INT1-b1  $\rightarrow$  INT5-b1 steps, involved m-CPBA as oxidant.

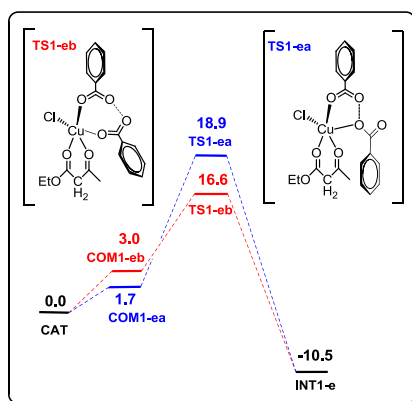

**Figure S5.** Gibbs free-energy profiles ( $\Delta G$ , kcal/mol) for the oxidation step, involved BP as oxidant, with the schematic representation of stationary points along the reaction coordinates.

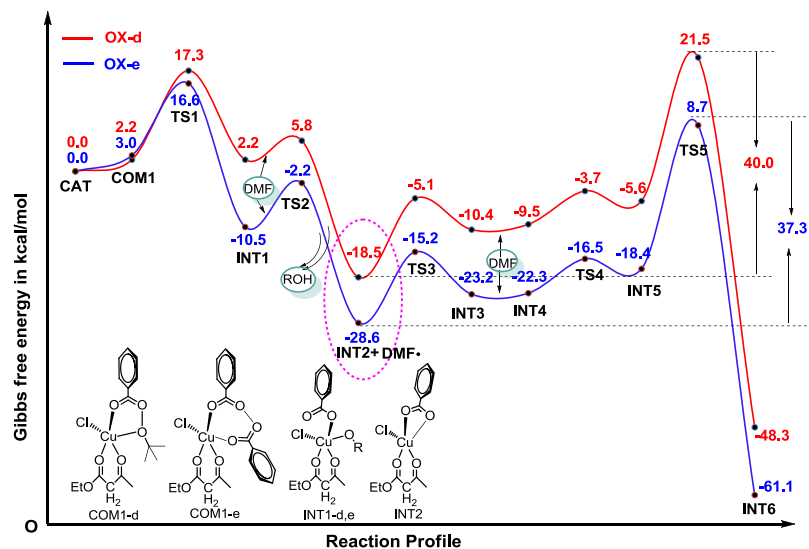

**Figure S6.** Gibbs free-energy profiles ( $\Delta G$ , kcal/mol) for the entire catalytic cycle, involved in the discussion on TBPB (**OX-d**) and BP (**OX-e**) as oxidant, computed at B3LYP+IDSCRF/DZVP level in acetonitrile at 343K.

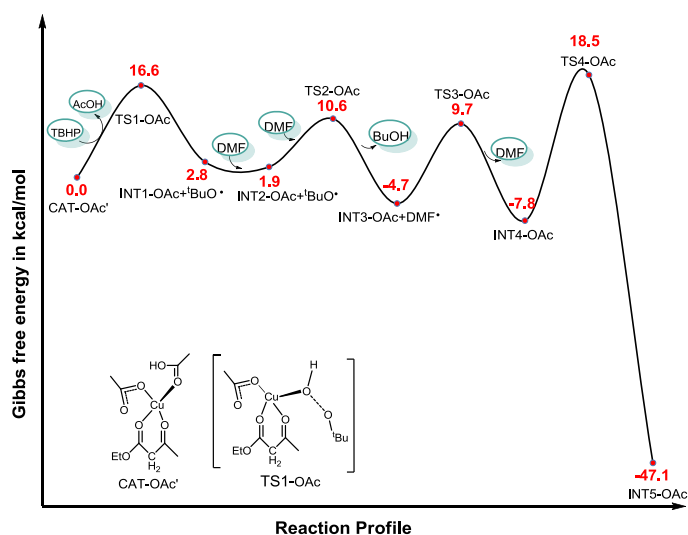

**Figure S7.** Gibbs free-energy profiles ( $\Delta G$ , kcal/mol) for the entire catalytic cycle, involved in the discussion on CuOAc as catalyst, computed at B3LYP+IDSCRF/DZVP level in acetonitrile at 343K.



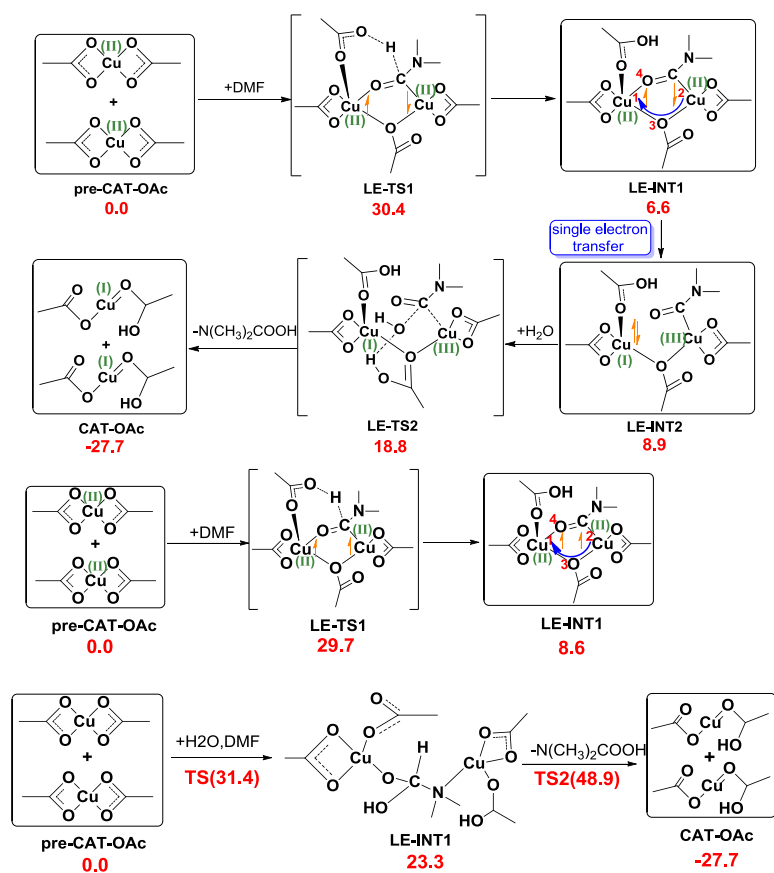

Figure S8. Gibbs free-energy profiles ( $\Delta G$ , kcal/mol) for the other probable reduction steps of  $\text{CuCl}_2$  and  $\text{Cu}(\text{OAc})_2$ .

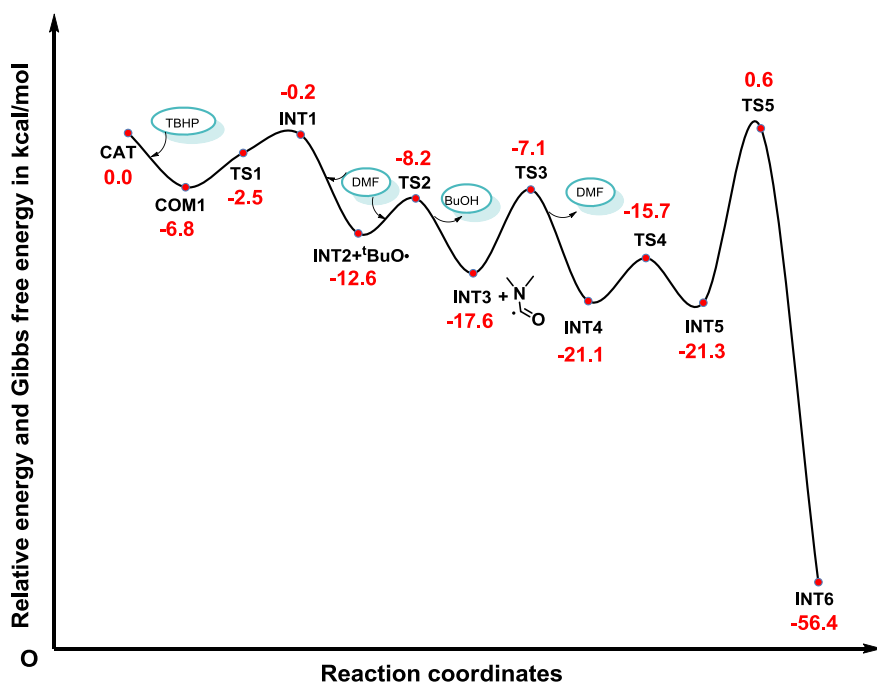

Figure S9. Gibbs free-energy profiles ( $\Delta G$ , kcal/mol) for the entire catalytic cycle, involved in the discussion on TBHP as oxidant, computed at M06L+IDSCRF/DZVP level in acetonitrile at 343K.
